# Supplementary material
Source: PubMed Central journal article supplement (PMC2633938)

# **Mild Conditions for Pd-Catalyzed Carboamination of Terminal-, $\alpha$ -Disubstituted-, and $\beta$ -Disubstituted $\gamma$ -Aminoalkenes. Scope, Limitations, and Mechanism of Pyrrolidine Formation.**

**Myra Beaudoin Bertrand, Joshua D. Neukom and John P. Wolfe\***

*Department of Chemistry, University of Michigan, 930 N. University Ave., Ann Arbor, MI, 48109-1055*

## **Supporting Information**

Experimental procedures and characterization data for new compounds in Tables 1–5 and equations 2–12 (146 pages).

## **Table of Contents**

|                                                                          |     |
|--------------------------------------------------------------------------|-----|
| General Considerations                                                   | S1  |
| Synthesis of Substrates                                                  | S2  |
| Synthesis of Functionalized Pyrrolidines via Coupling with Aryl Bromides | S12 |
| Deuterium-Labeling Experiments                                           | S41 |
| References                                                               | S46 |
| $^1\text{H}$ NMR and $^{13}\text{C}$ NMR Spectra for New Compounds       | S48 |

Standard Proton

File: mbb-2-179-HNMR-500

Pulse Sequence: s2pul

Solvent: cdcl3

Ambient temperature

Operator: myrabort

File: mbb-2-179-HNMR-500

INOVA-500 "Md.Chem.LSA,UMich.Edu"

Relax. delay 0.100 sec

Pulse 45.0 degrees

Acq. time 3.000 sec

Width 8003.2 Hz

8 repetitions

OBSERVE H1, 499.9042358 MHz

DATA PROCESSING

Line broadening 0.2 Hz

FT size 65536

Total time 0 min, 31 sec

Acquisition date: Jun 13 2007

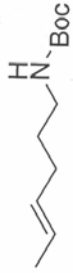

25

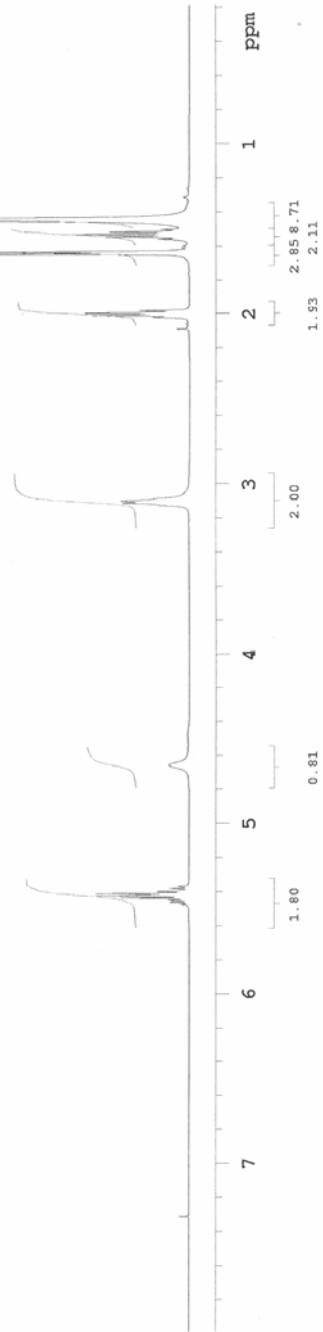

Standard Carbon

| INDEX | FREQUENCY PPM | HEIGHT  |
|-------|---------------|---------|
| 1     | 18594.655     | 155.883 |
| 2     | 16370.286     | 130.232 |
| 3     | 15767.760     | 125.439 |
| 4     | 9906.820      | 78.813  |
| 5     | 9712.115      | 77.264  |
| 6     | 9679.894      | 77.007  |
| 7     | 9648.134      | 76.755  |
| 8     | 5032.753      | 40.037  |
| 9     | 3736.101      | 29.722  |
| 10    | 3559.347      | 28.316  |
| 11    | 2309.646      | 18.374  |
| 12    | 2232.316      | 17.759  |

File: mbb-2-179-C13-500

Pulse Sequence: s2pul

Solvent: cdcl3

Ambient temperature

Operator: myrbert

File: mbb-2-179-C13-500

INOVA-500 "Md.Chem.LSA,UMich.Edu"

Relax. delay 0.100 sec

Pulse 45.0 degrees

Acq. time 1.300 sec

Width 30165.9 Hz

224 repetitions

OBSERVE C13, 125.7010313 MHz

DECOUPLE H1, 499.967532 MHz

Power 31 dB

continuously on

WALTZ-16 modulated

DATA PROCESSING

Line broadening 1.0 Hz

FT size 131072

Total time 5 min, 18 sec

Acquisition date: Jun 13 2007

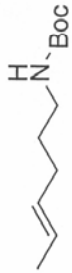

25

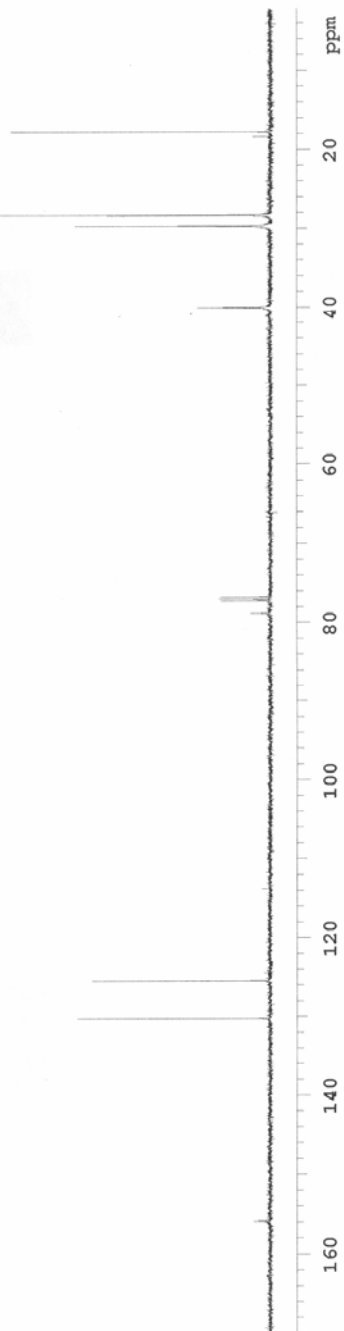

Standard Proton

File: mbb-9-63-co-iso-HNMR

Pulse Sequence: szpul

Solvent: cdcl3

Ambient temperature

Operator: myrabort

File: mbb-9-63-co-iso-HNMR

INOVA-500 "Ml.Chem.LSA.DM.ch.Edu"

Relax. delay 0.100 sec

Pulse 45.0 degrees

Acq. time 3.000 sec

Width 8003.2 Hz

16 repetitions

OBSERVE H1, 499.9042639 MHz

DATA PROCESSING

Line broadening 0.2 Hz

FT size 65536

Total time 0 min, 55 sec

Acquisition date: Jun 18 2007

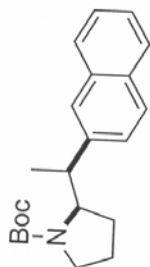

26

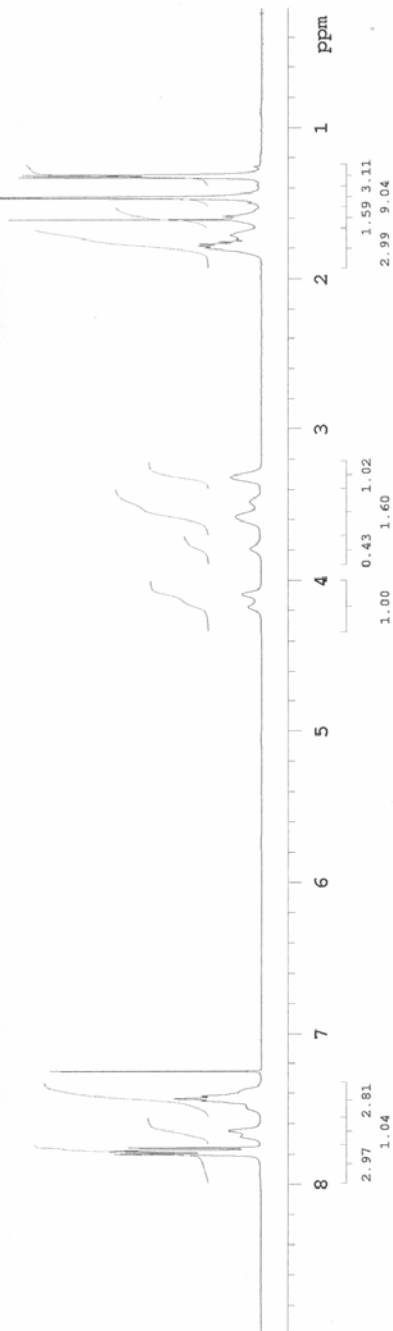

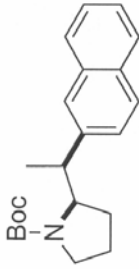

26

| INDEX | FREQUENCY PPM | HEIGHT  |
|-------|---------------|---------|
| 1     | 19469.550     | 154.888 |
| 2     | 19230.197     | 152.984 |
| 3     | 17784.409     | 141.482 |
| 4     | 16774.521     | 133.448 |
| 5     | 16619.402     | 132.214 |
| 6     | 16046.334     | 127.655 |
| 7     | 16027.922     | 127.508 |
| 8     | 15952.894     | 126.911 |
| 9     | 15821.710     | 125.868 |
| 10    | 15752.206     | 125.315 |
| 11    | 9974.579      | 79.352  |
| 12    | 9711.750      | 77.261  |
| 13    | 9679.990      | 77.008  |
| 14    | 9648.230      | 76.755  |
| 15    | 7865.046      | 62.569  |
| 16    | 5995.326      | 47.695  |
| 17    | 5930.425      | 47.179  |
| 18    | 5216.967      | 41.503  |
| 19    | 5093.147      | 40.518  |
| 20    | 3585.220      | 28.522  |
| 21    | 3364.278      | 26.764  |
| 22    | 3261.632      | 25.948  |
| 23    | 3060.944      | 24.351  |
| 24    | 2970.265      | 23.630  |
| 25    | 1659.805      | 13.204  |
| 26    | 1622.981      | 12.911  |

Standard Carbon

File: mbb-9-63-C13-500

Pulse Sequence: s2pul

Solvent: cdcl3

Ambient temperature

Operator: myrabort

File: mbb-9-63-C13-500

INOVA-500 "Ml.Chem.LSA,UMich.Edu"

Relax. delay 0.100 sec

Pulse 45.0 degrees

Acq. time 1.300 sec

Width 30165.9 Hz

13056 repetitions

OBSERVE C13, 125.7010266 MHz

DECOUPLE H1, 499.9067532 MHz

Power 31 dB

continuously on

WALTZ-16 modulated

DATA PROCESSING

Line broadening 1.0 Hz

FT size 131072

Total time 5 hr, 6 min, 43 sec

Acquisition date: Jun 19 2007

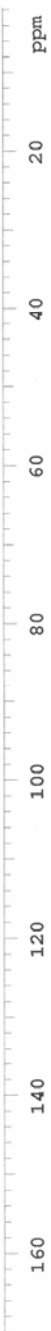

Standard Proton

File: mbb-9-74-HNMR  
Pulse Sequence: s2pul  
Solvent: cdcl3  
Ambient temperature  
Operator: myrabert  
File: mbb-9-74-HNMR  
INOVA-500 "Md. Chem. LSA, UMICH. EdU"

Relax. delay 0.100 sec  
Pulse 45.0 degrees  
Acq. time 3.000 sec  
Width 8003.2 Hz  
8 repetitions  
OBSERVE H1, 499.9042638 MHz  
DATA PROCESSING  
Line broadening 0.2 Hz  
FT size 65536  
Total time 0 min, 31 sec  
Acquisition date: Jun 25 2007

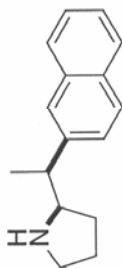

**26a**

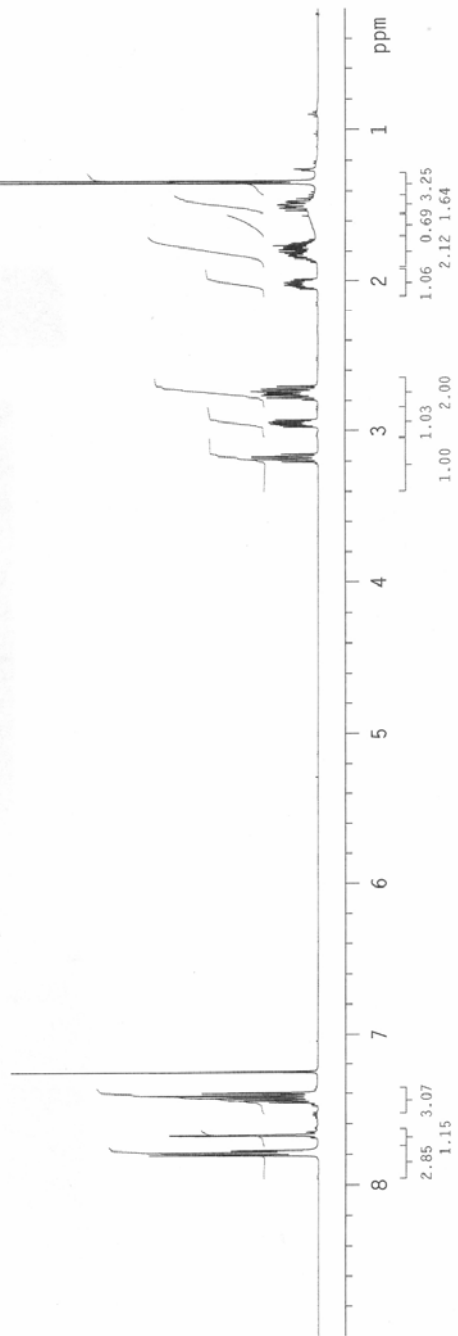

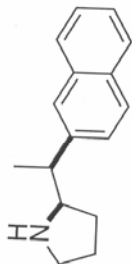

**26a**

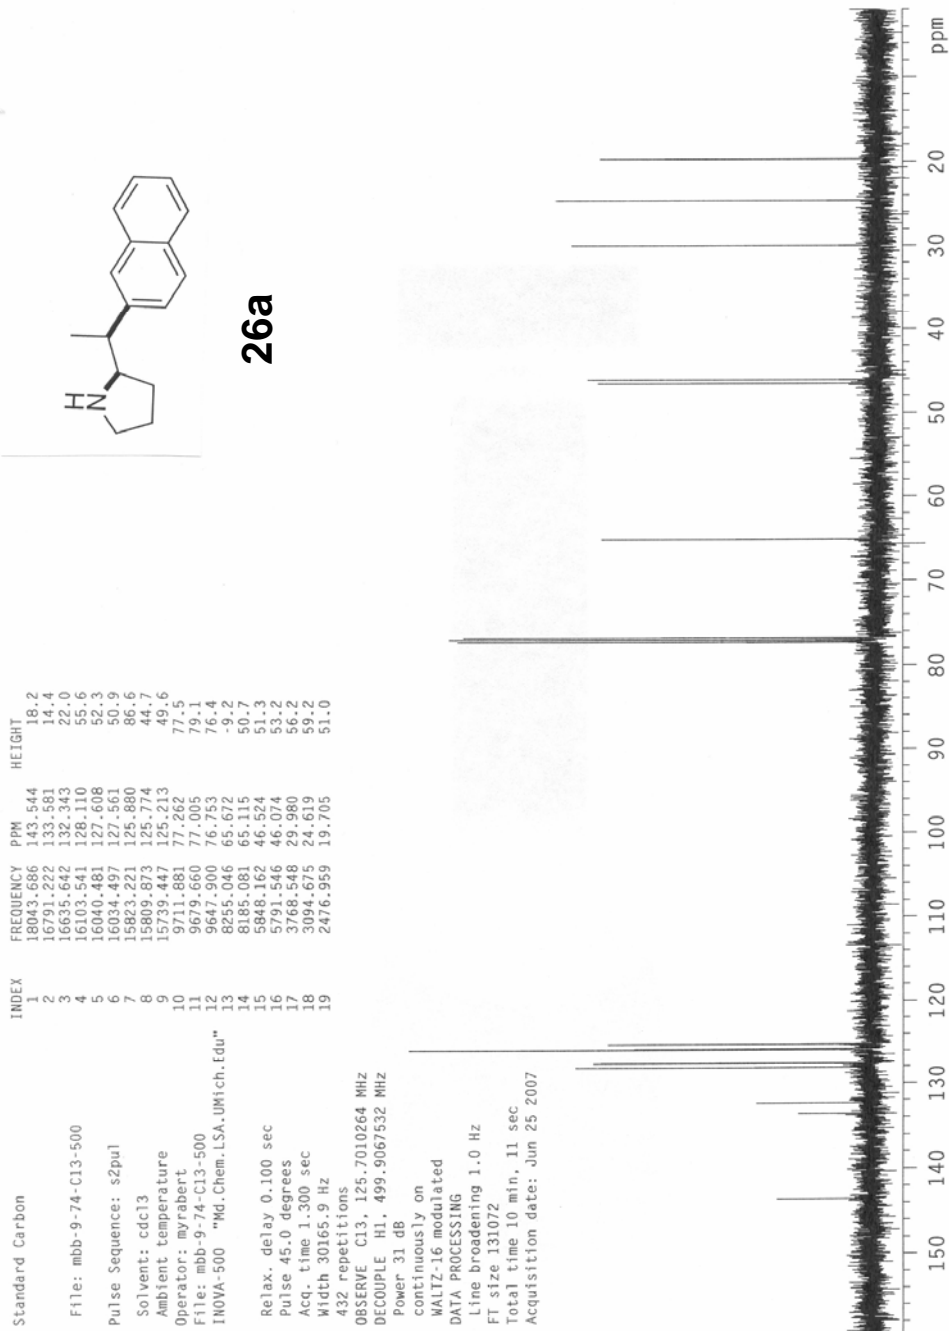

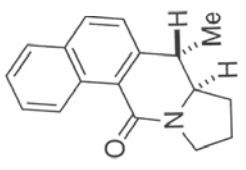

**S2**

Std proton

File: mbb-9-203-iso-top

Pulse Sequence: s2pul

Solvent: cdcl3

Ambient temperature

Operator: myrabert

File: mbb-9-203-iso-top

INOVA-400 "Md.Chem.LSA.UMich.Edu"

Relax. delay 0.500 sec

Pulse 45.0 degrees

Acq. time 3.000 sec

Width 6399.5 Hz

16 repetitions

OBSERVE H1, 399.9649487 MHz

DATA PROCESSING

Line broadening 0.2 Hz

FT size 65536

Total time 1 min, 3 sec

Acquisition date: Sep 23 2007

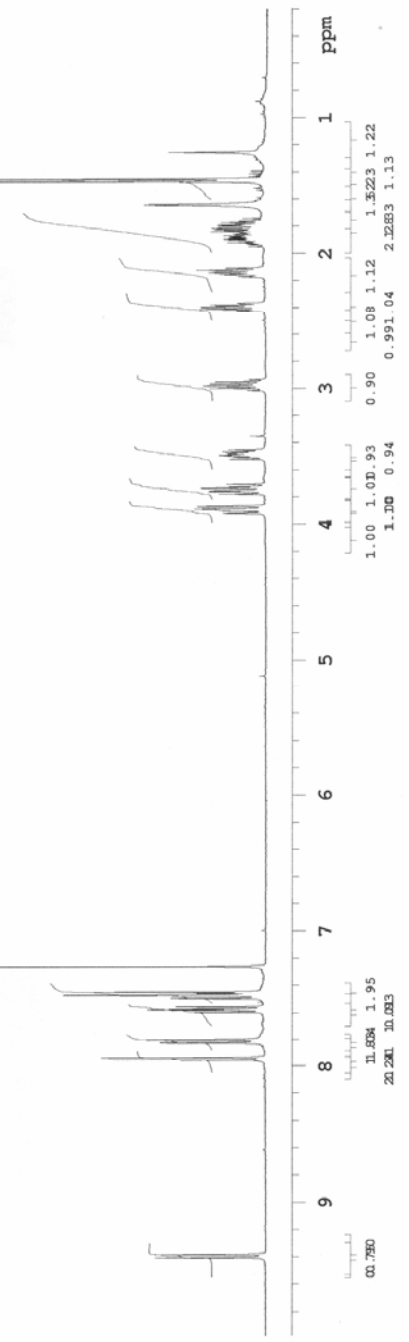



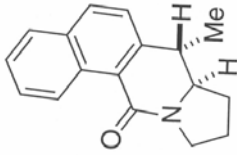

**S2**

| INDEX | FREQUENCY FPM | HEIGHT  |
|-------|---------------|---------|
| 1     | 14260.219     | 141.792 |
| 2     | 13356.294     | 132.804 |
| 3     | 13295.149     | 132.196 |
| 4     | 13207.482     | 131.325 |
| 5     | 12854.605     | 127.816 |
| 6     | 12823.664     | 127.508 |
| 7     | 12770.622     | 126.981 |
| 8     | 12642.437     | 125.706 |
| 9     | 12232.835     | 121.633 |
| 10    | 7776.568      | 77.324  |
| 11    | 7744.891      | 77.009  |
| 12    | 7712.476      | 76.687  |
| 13    | 6195.622      | 61.604  |
| 14    | 4590.364      | 45.643  |
| 15    | 3964.910      | 39.424  |
| 16    | 3346.087      | 33.271  |
| 17    | 2341.235      | 23.279  |
| 18    | 1467.515      | 14.592  |

Std Carbon

File: mbb-9-203-iso-top-C13-CDCl3-409

Pulse Sequence: s2pul

Solvent: cdcl3

Ambient temperature

Operator: myrabort

File: mbb-9-203-iso-top-C13-CDCl3-402

INOVA-400 "Md.Chem.USA.UMich.Edu"

Relax. delay 0.100 sec

Pulse 45.0 degrees

Acq. time 1.300 sec

Width 24140.0 Hz

560 repetitions

OBSERVE C13, 100.5712668 MHz

DECOUPLE H1, 399.9669644 MHz

Power 39 dB

continuously on

WALTZ-16 modulated

DATA PROCESSING

Line broadening 0.8 Hz

FT size 65536

Total time 13 min, 9 sec

Acquisition date: Sep 23 2007

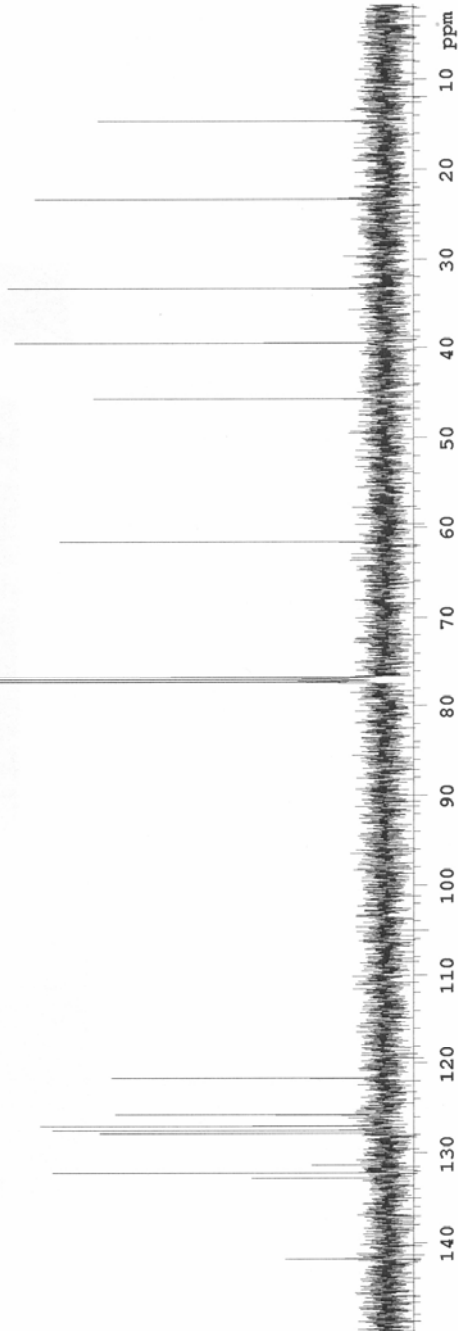

Std proton

File: mbb-10-48-HMR-400

Pulse Sequence: s2pul

Solvent: cdcl3

Temp: 23.0 C / 296.1 K

Operator: myrabort

File: mbb-10-48-HMR-400

INOVA-400 "Md.Chem.LSA,UMich,Eda"

Relax. delay 0.500 sec

Pulse 45.0 degrees

Acq. time 3.000 sec

Width 6599.5 Hz

8 repetitions

OBSERVE H1, 399.9649524 MHz

DATA PROCESSING

Line broadening 0.2 Hz

FT size 65536

Total time 0 min, 35 sec

Acquisition date: Nov 20 2007

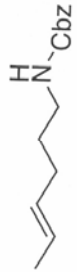

27

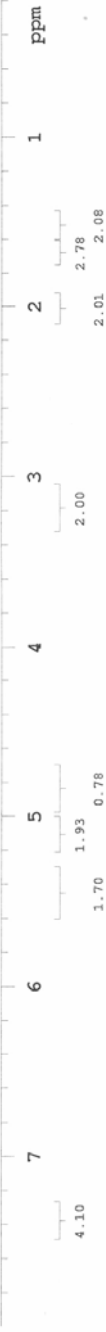

Std Carbon

File: mbb-10-48-C13-400

Pulse Sequence: s2pul

Solvent: cdcl3

Temp. 23.0 C / 296.1 K

Operator: myrabort

File: mbb-10-48-C13-400

INOVA-400 "Md.Chem.LSA,UMich.Edu"

Relax. delay 0.100 sec

Pulse 30.0 degrees

Acq. time 1.300 sec

Width 24140.0 Hz

112 repetitions

OBSERVE C13, 100.5712728 MHz

DECOUPLE H1, 399.9669644 MHz

Power 39 dB

continuously on

WALTZ-16 modulated

DATA PROCESSING

Line broadening 0.8 Hz

Ft size 65536

Total time 2 min, 37 sec

Acquisition date: Nov 20 2007

| INDEX | FREQUENCY PPM | HEIGHT |
|-------|---------------|--------|
| 1     | 15720.275     | 12.1   |
| 2     | 13736.566     | 34.6   |
| 3     | 13082.908     | 40.3   |
| 4     | 12917.152     | 151.7  |
| 5     | 12878.107     | 66.8   |
| 6     | 12873.687     | 64.7   |
| 7     | 12640.154     | 44.5   |
| 8     | 7776.496      | 92.4   |
| 9     | 7744.818      | 88.5   |
| 10    | 7712.403      | 89.4   |
| 11    | 6687.661      | 47.0   |
| 12    | 4075.342      | 44.6   |
| 13    | 2982.823      | 56.2   |
| 14    | 2978.403      | 53.9   |
| 15    | 1793.798      | 90.4   |

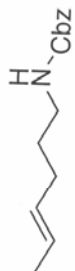

27

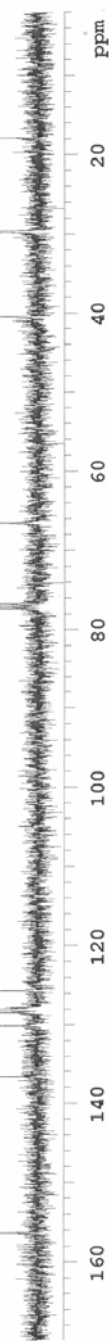

Std proton

File: mbb-9-140-HNMR-400

Pulse Sequence: s2pul

Solvent: cdcl3

Temp: 22.0 C / 295.1 K

Operator: myrabert

File: mbb-9-140-HNMR-400

INOVA-400 "Md.Chem.LSA.UNMich.Edu"

Relax. delay 0.500 sec

Pulse 45.0 degrees

Acq. time 3.000 sec

Width 6399.5 Hz

8 repetitions

OBSERVE H1, 399.9619426 MHz

DATA PROCESSING

Line broadening 0.2 Hz

FT size 65536

Total time 0 min, 35 sec

Acquisition date: Aug 3 2007

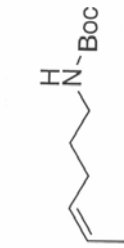

28

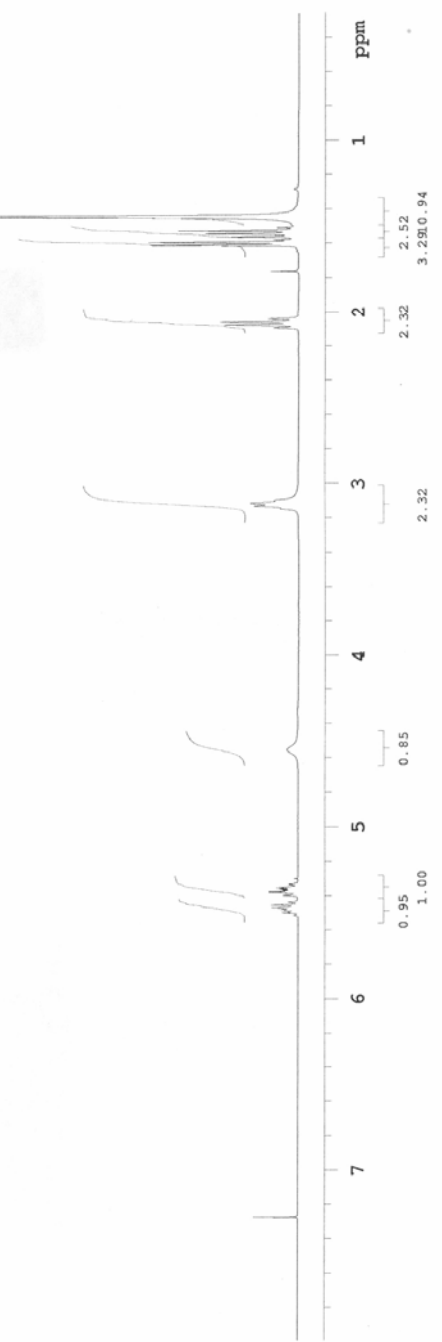

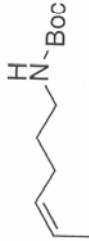

28

Std Carbon

| INDEX | FREQUENCY PPM | HEIGHT  |
|-------|---------------|---------|
| 1     | 15681.967     | 155.929 |
| 2     | 13019.552     | 129.456 |
| 3     | 12531.123     | 124.599 |
| 4     | 7944.462      | 78.993  |
| 5     | 7776.496      | 77.323  |
| 6     | 7764.709      | 77.206  |
| 7     | 7744.818      | 77.008  |
| 8     | 7713.140      | 76.693  |
| 9     | 4044.400      | 40.214  |
| 10    | 2996.820      | 29.798  |
| 11    | 2855.375      | 28.392  |
| 12    | 2753.711      | 27.381  |
| 13    | 2422.935      | 24.092  |
| 14    | 1278.112      | 12.709  |

File: mbb-9-140-C13-400  
Pulse Sequence: s2pul  
Solvent: cdcl3  
Temp: 22.0 C / 295.1 K  
Operator: myrabort  
File: mbb-9-140-C13-400  
INOVA-400 "Md.Chem.USA,DMich.Edu"

Relax. delay 0.100 sec  
Pulse 45.0 degrees  
Acq. time 1.300 sec  
Width 24140.0 Hz  
400 repetitions  
OBSERVE C13, 100.5712669 MHZ  
DECOUPLE H1, 399.9669644 MHZ  
Power 39 dB  
continuously on  
WALTZ-16 modulated  
DATA PROCESSING  
Line broadening 0.8 Hz  
FT size 65536  
Total time 9 min, 23 sec  
Acquisition date: Aug 3 2007

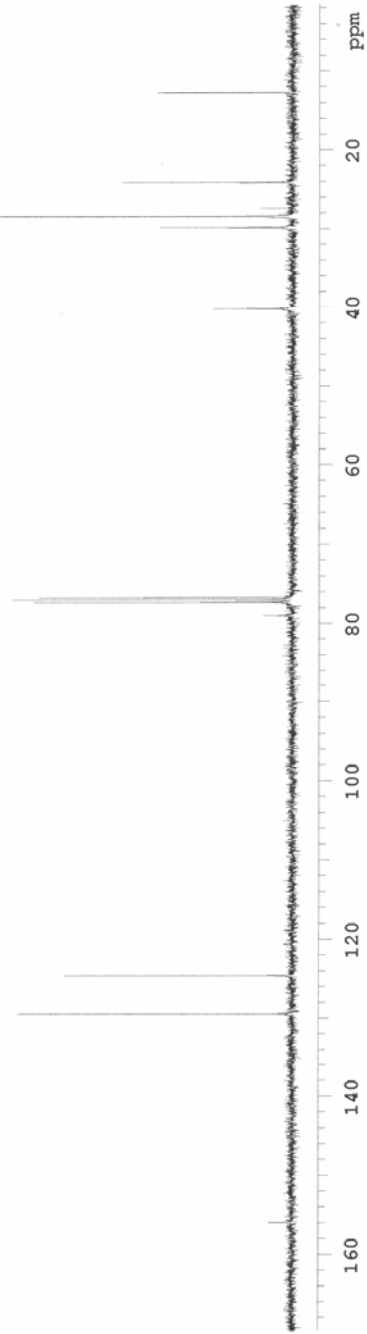

Std proton

File: mbb-10-35A-iso-secondcolumn

Pulse Sequence: s2pul

Solvent: cdcl3

Temp: 23.0 C / 296.1 K

Operator: myrabort

File: mbb-10-35A-iso-secondcolumn

INOVA-400 "Md.Chem.LSA,UMich.Edu"

Relax. delay 0.500 sec

Pulse 45.0 degrees

Acq. time 3.000 sec

Width 6399.5 Hz

16 repetitions

OBSERVE HL, 399.9649575 MHz

DATA PROCESSING

Line broadening 0.2 Hz

FT size 65536

Total time 1 min, 3 sec

Acquisition date: Oct 25 2007

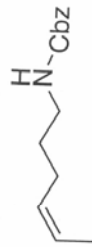

29

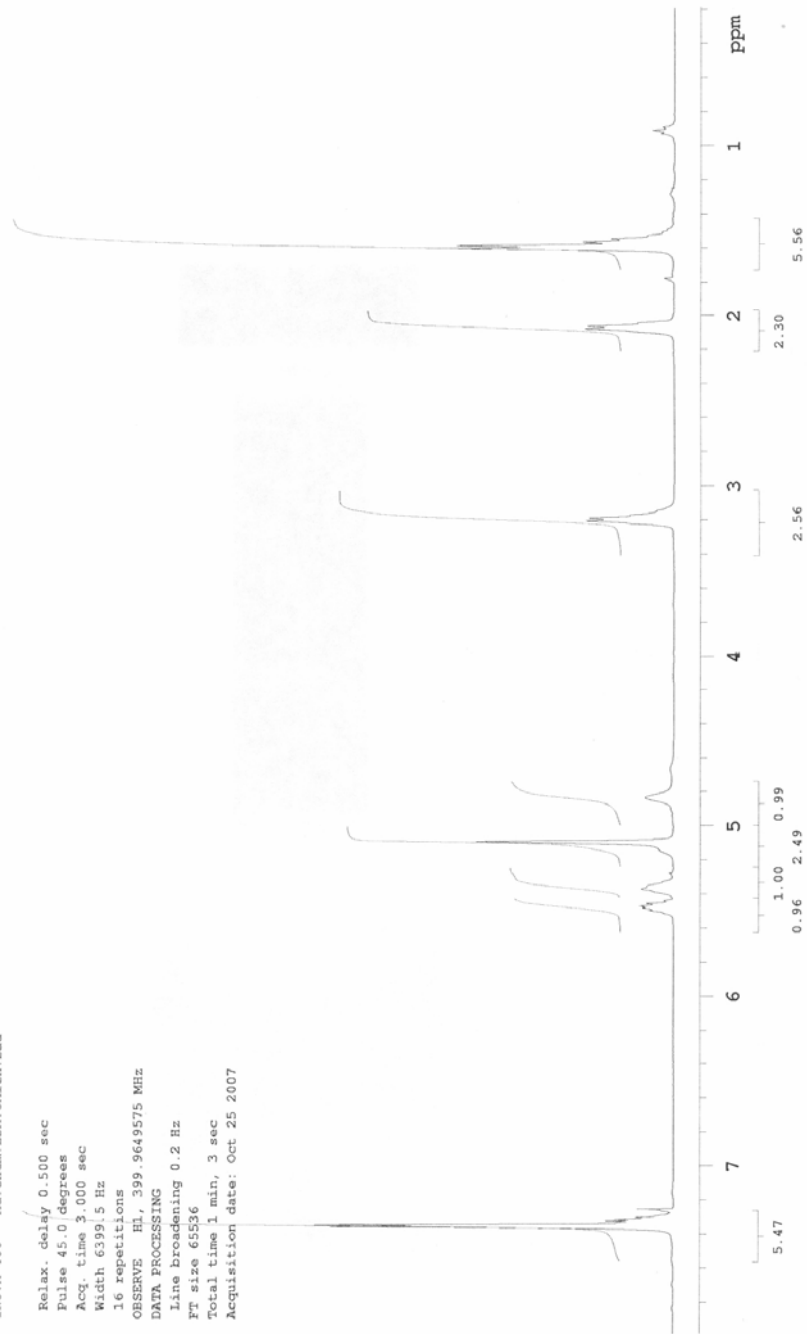

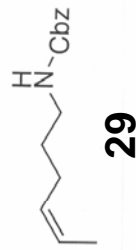

| INDEX | FREQUENCY PPM | HEIGHT |
|-------|---------------|--------|
| 1     | 15721.400     | 13.4   |
| 2     | 13738.218     | 26.0   |
| 3     | 13001.523     | 40.1   |
| 4     | 12917.540     | 159.6  |
| 5     | 12878.495     | 78.5   |
| 6     | 12874.812     | 75.1   |
| 7     | 12541.826     | 48.1   |
| 8     | 7776.885      | 97.6   |
| 9     | 7744.470      | 92.2   |
| 10    | 7712.792      | 96.2   |
| 11    | 6688.787      | 48.6   |
| 12    | 4089.728      | 41.6   |
| 13    | 2980.265      | 48.1   |
| 14    | 2414.484      | 47.9   |
| 15    | 1277.027      | 51.4   |

Std Carbon  
 File: mbb-10-35A-C13-400  
 Pulse Sequence: sZpul  
 Solvent: cdcl3  
 Temp: 23.0 C / 296.1 K  
 Operator: myrabort  
 File: mbb-10-35A-C13-400  
 INOVA-400 "Md.Chem.LSA.UMich.Edu"  
 Relax. delay 0.100 sec  
 Pulse 30.0 degrees  
 Acq. time 1.300 sec  
 Width 24140.0 Hz  
 112 repetitions  
 OBSERVE C13, 100.5712746 MHz  
 DECOUPLE H1, 399.9669644 MHz  
 Power 39 dB  
 continuously on  
 WALTZ-16 modulated  
 DATA PROCESSING  
 Line broadening 0.8 Hz  
 FT size 65536  
 Total time 2 min, 37 sec  
 Acquisition date: Oct 25 2007

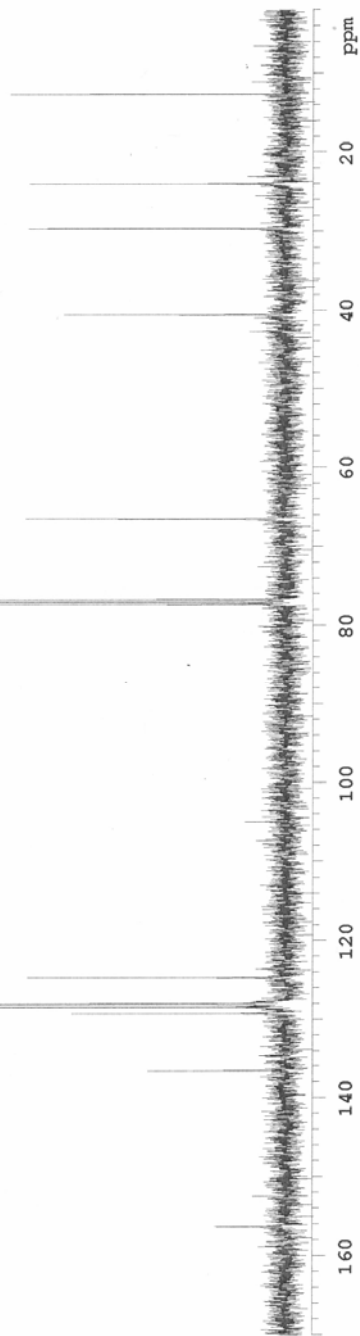

Std proton

File: mbb-10-37-iso-RNMR-400

Pulse Sequence: szpul

Solvent: cdcl3

Temp.: 23.0 C / 296.1 K

Operator: myrabort

File: mbb-10-37-iso-RNMR-400

INOVA-400 "Md.Chem.USA.UMich.Edu"

Relax. delay 0.500 sec

Pulse 45.0 degrees

Acq. time 3.000 sec

Width 6399.5 Hz

16 repetitions

OBSERVE H1, 399.9649442 MHz

DATA PROCESSING

Line broadening 0.2 Hz

FT size 65536

Total time 1 min, 3 sec

Acquisition date: Oct 29 2007

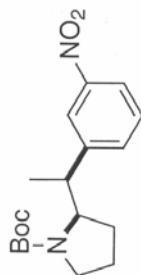

30

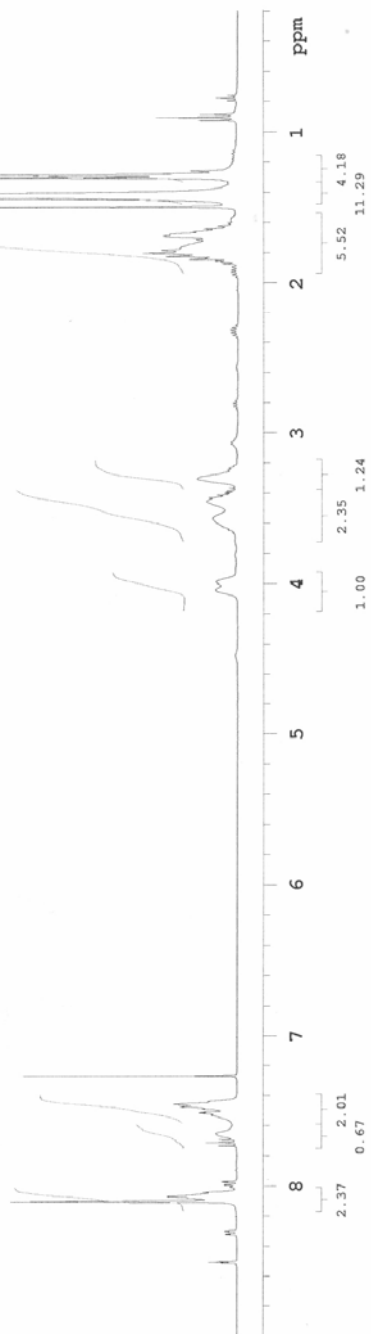



| INDEX | FREQUENCY PPM | HEIGHT  | INDEX  | FREQUENCY PPM | HEIGHT |
|-------|---------------|---------|--------|---------------|--------|
| 1     | 15556.003     | 154.676 | 9.040  | 2704.364      | 26.890 |
| 2     | 15285.636     | 151.988 | -3.841 | 2659.426      | 26.443 |
| 3     | 14896.661     | 148.120 | 4.342  | 2485.566      | 24.714 |
| 4     | 14691.860     | 146.084 | 53.043 | 2428.840      | 24.150 |
| 5     | 14683.757     | 146.003 | 4.544  | 2357.381      | 23.440 |
| 6     | 14111.345     | 140.312 | 4.945  | 2210.779      | 21.982 |
| 7     | 13539.670     | 134.628 | 8.346  | 1362.106      | 13.544 |
| 8     | 13502.835     | 134.261 | 8.2    |               |        |
| 9     | 13415.905     | 133.397 | 5.1    |               |        |
| 10    | 13404.118     | 133.280 | 14.1   |               |        |
| 11    | 13379.807     | 133.038 | 12.3   |               |        |
| 12    | 13102.073     | 130.277 | 11.3   |               |        |
| 13    | 13036.507     | 129.625 | 5.6    |               |        |
| 14    | 12995.989     | 129.222 | 4.8    |               |        |
| 15    | 12959.154     | 128.855 | 11.5   |               |        |
| 16    | 12397.793     | 123.274 | 12.6   |               |        |
| 17    | 12323.387     | 122.534 | 52.1   |               |        |
| 18    | 12282.132     | 122.124 | 12.9   |               |        |
| 19    | 12277.712     | 122.080 | 11.7   |               |        |
| 20    | 12249.717     | 121.801 | 4.6    |               |        |
| 21    | 12237.194     | 121.677 | 8.9    |               |        |
| 22    | 12202.569     | 121.333 | 17.9   |               |        |
| 23    | 12181.941     | 121.127 | 7.2    |               |        |
| 24    | 8004.146      | 79.587  | 5.5    |               |        |
| 25    | 7964.364      | 79.191  | 5.8    |               |        |
| 26    | 7776.507      | 77.323  | 233.1  |               |        |
| 27    | 7765.457      | 77.213  | 12.5   |               |        |
| 28    | 7744.829      | 77.008  | 238.4  |               |        |
| 29    | 7712.415      | 76.686  | 229.4  |               |        |
| 30    | 6513.812      | 64.768  | 9.2    |               |        |
| 31    | 6266.283      | 62.307  | 9.5    |               |        |
| 32    | 4759.742      | 47.327  | 8.9    |               |        |
| 33    | 4717.014      | 46.902  | 7.6    |               |        |
| 34    | 4173.333      | 41.496  | 7.8    |               |        |
| 35    | 4109.978      | 40.866  | 9.5    |               |        |
| 36    | 4000.210      | 39.775  | 5.9    |               |        |
| 37    | 2864.964      | 28.487  | 49.1   |               |        |
| 38    | 2857.597      | 28.414  | 269.3  |               |        |
| 39    | 2835.496      | 28.194  | 6.5    |               |        |

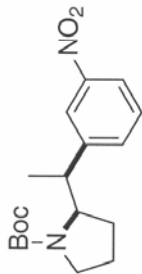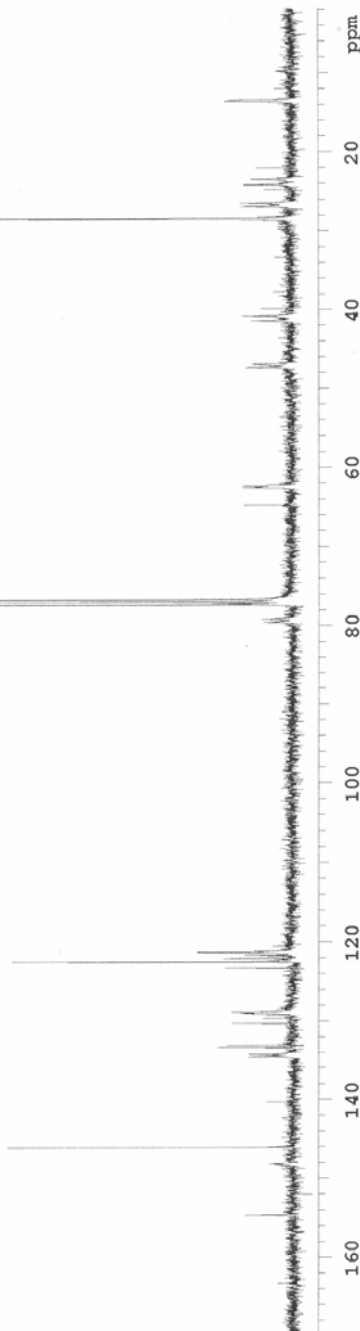

Std proton

File: mbb-10-38-cr

Pulse Sequence: s2pul

Solvent: cdcl3

Temp. 23.0 C / 296.1 K

Operator: myrabert

File: mbb-10-38-cr

INOVA-400 "Md. Chem. LSA, UMfich. Edu"

Relax. delay 0.500 sec

Pulse 45.0 degrees

Acq. time 3.000 sec

Width 6399.5 Hz

8 repetitions

OBSERVE H1, 399.9649515 MHz

DATA PROCESSING

Line broadening 0.2 Hz

FT size 65536

Total time 0 min, 35 sec

Acquisition date: Oct 25 2007

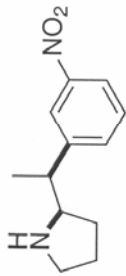

**30a**

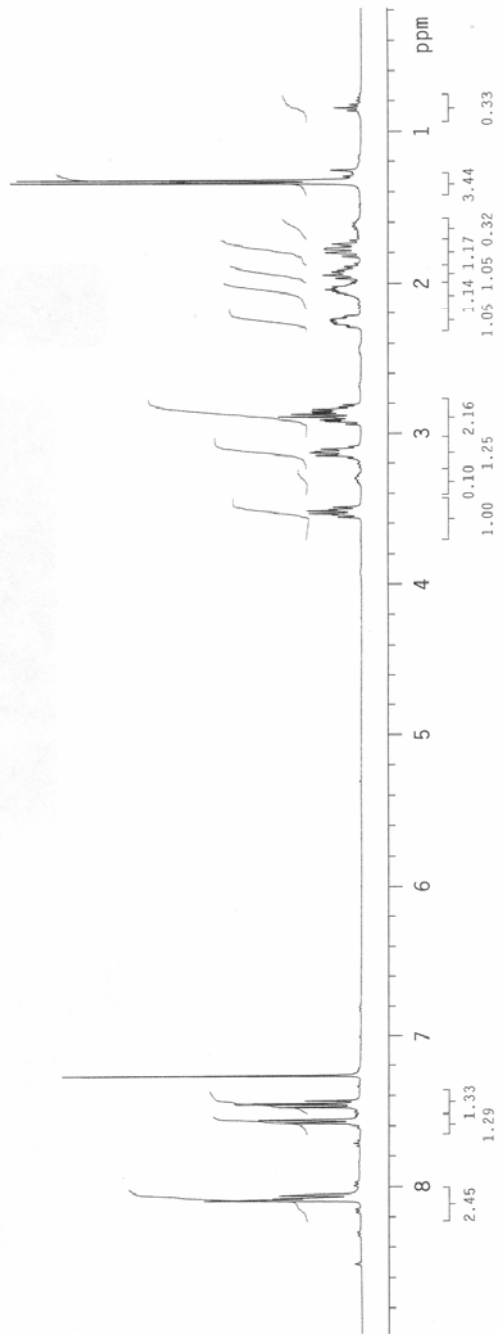

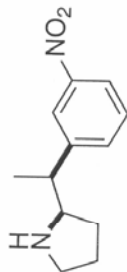

**30a**

| Std Carbon | INDEX | FREQUENCY PPM | HEIGHT  |
|------------|-------|---------------|---------|
|            | 1     | 14924.314     | 148.395 |
|            | 2     | 14543.443     | 144.608 |
|            | 3     | 13424.404     | 133.482 |
|            | 4     | 13055.320     | 129.812 |
|            | 5     | 12329.675     | 122.596 |
|            | 6     | 12295.051     | 122.252 |
|            | 7     | 7776.902      | 77.327  |
|            | 8     | 7745.224      | 77.012  |
|            | 9     | 7712.810      | 76.690  |
|            | 10    | 6539.255      | 65.021  |
|            | 11    | 4510.398      | 44.848  |
|            | 12    | 4295.283      | 42.709  |
|            | 13    | 2964.076      | 29.472  |
|            | 14    | 2363.669      | 23.502  |
|            | 15    | 1991.639      | 19.803  |

Relax. delay 0.100 sec  
 Pulse 30.0 degrees  
 Acq. time 1.300 sec  
 Width 24140.0 Hz  
 208 repetitions  
 OBSERVE C13, 100.5712680 MHz  
 DECOUPLE H1, 399.9669644 MHz  
 Power 39 dB  
 continuously on  
 WALTZ-16 modulated  
 DATA PROCESSING  
 Line broadening 0.8 Hz  
 FT size 65536  
 Total time 4 min, 53 sec  
 Acquisition date: Oct 25 2007

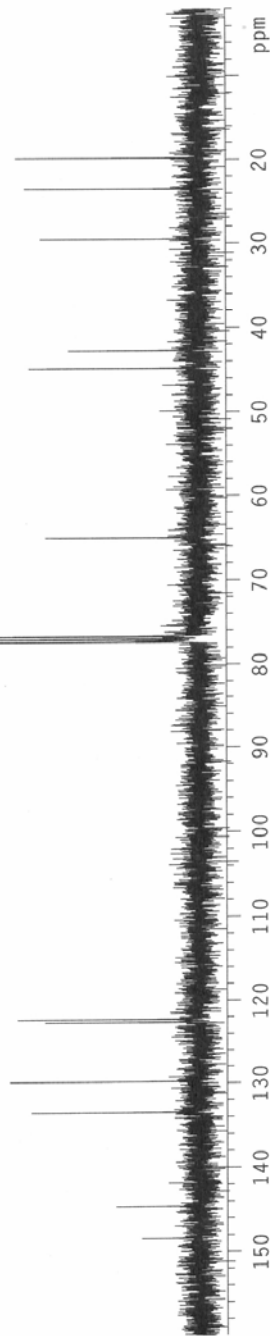

Std proton

File: mbb-10-22-HNMR-400

Pulse Sequence: szpul

Solvent: cdcl3

Temp.: 23.0 C / 296.1 K

Operator: myrabort

File: mbb-10-22-HNMR-400

INOVA-400 "Ml.Chem.LSA.UMi.ch.Bdu"

Relax. delay 0.500 sec

Pulse 45.0 degrees

Acq. time 3.000 sec

Width 6399.5 Hz

16 repetitions

OBSERVE H1, 399.9649435 MHz

DATA PROCESSING

Line broadening 0.2 Hz

FT size 65536

Total time 1 min, 3 sec

Acquisition date: Oct 15 2007

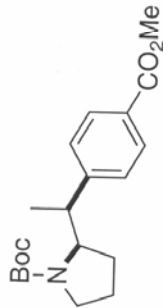

32

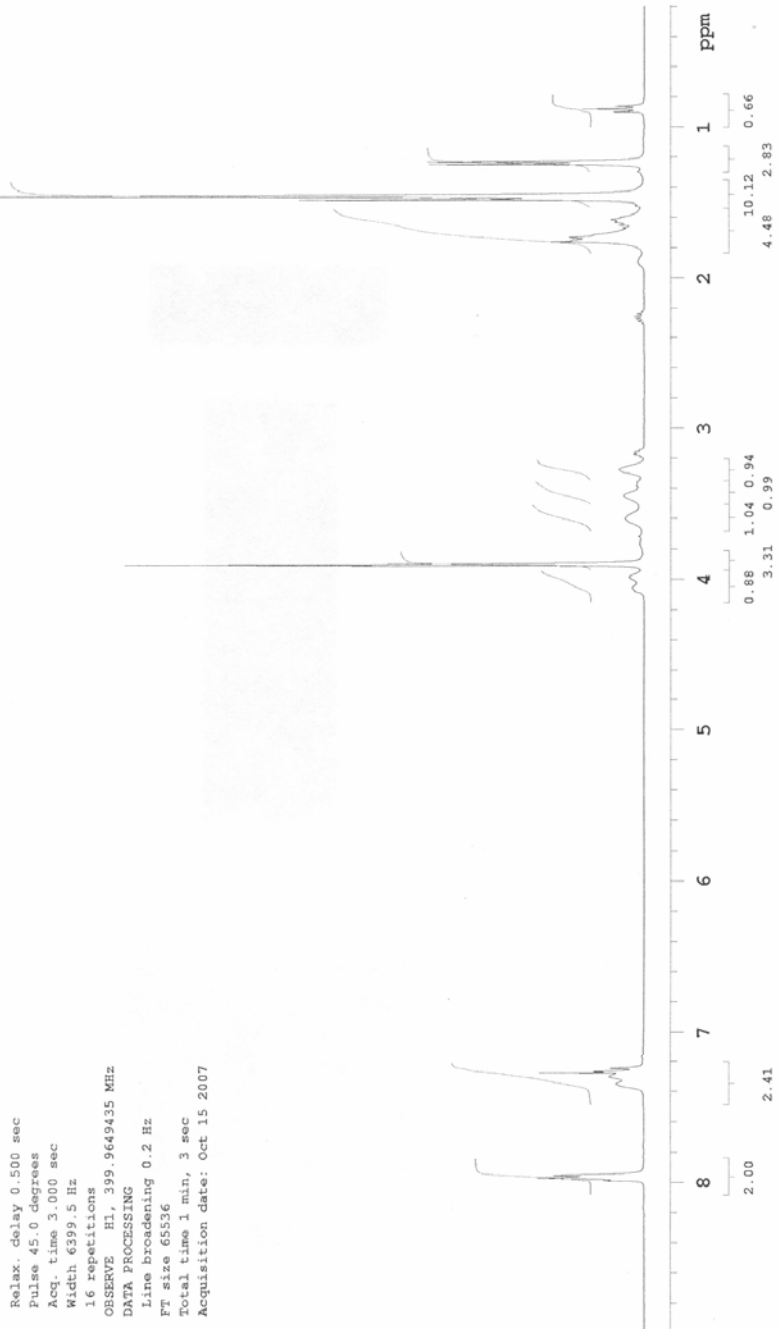

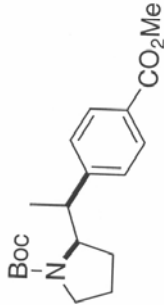

32

Std Carbon

File: mbb-10-22-C13-400

Pulse Sequence: sZpul

Solvent: cdcl3

Temp. 23.0 C / 296.1 K

Operator: myrabort

File: mbb-10-22-C13-400

INOVN-400 "Ml.Chem.LSA.DMch.Edu"

Relax. delay 0.100 sec

Pulse 45.0 degrees

Acq. time 1.300 sec

Width 24140.0 Hz

1968 repetitions

OBSERVE C13, 100.5712685 MHz

DECOUPLE H1, 399.9669644 MHz

Power 39 dB

continuously on

MALTZ-16 modulated

DATA PROCESSING

Line broadening 0.8 Hz

FT size 65536

Total time 46 min, 13 sec

Acquisition date: Oct 15 2007

| INDEX | FREQUENCY PPM | HEIGHT  |
|-------|---------------|---------|
| 1     | 16802.346     | 167.069 |
| 2     | 16781.718     | 166.864 |
| 3     | 15564.699     | 154.763 |
| 4     | 15023.228     | 149.379 |
| 5     | 13070.250     | 129.960 |
| 6     | 13021.629     | 129.477 |
| 7     | 12918.491     | 128.451 |
| 8     | 12858.082     | 127.850 |
| 9     | 12785.886     | 127.133 |
| 10    | 7987.057      | 79.417  |
| 11    | 7776.362      | 77.322  |
| 12    | 7764.575      | 77.205  |
| 13    | 7743.948      | 77.000  |
| 14    | 7712.270      | 76.685  |
| 15    | 6278.662      | 62.430  |
| 16    | 5230.345      | 52.006  |
| 17    | 5224.452      | 51.948  |
| 18    | 4780.225      | 47.531  |
| 19    | 4733.813      | 47.069  |
| 20    | 4185.712      | 41.619  |
| 21    | 4102.466      | 40.792  |
| 22    | 2863.345      | 28.471  |
| 23    | 2696.116      | 26.808  |
| 24    | 2626.130      | 26.112  |
| 25    | 2433.852      | 24.200  |
| 26    | 2363.866      | 23.504  |
| 27    | 1316.286      | 13.088  |
| 28    | 978.880       | 9.733   |

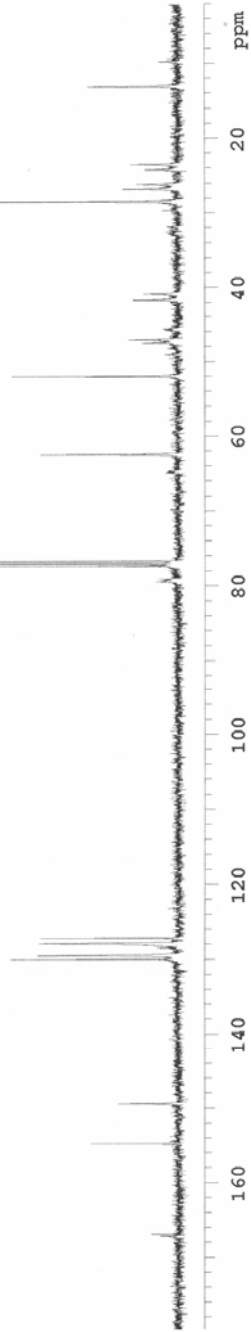

Std proton

File: mbb-10-21-cr  
Pulse Sequence: s2pul  
Solvent: cdcl3  
Temp: 23.0 C / 296.1 K  
Operator: myrabert  
File: mbb-10-21-cr  
INOVA-400 "Md.Chem.LSA,UMich.Edu"

Relax. delay 0.500 sec  
Pulse 45.0 degrees  
Acq. time 3.000 sec  
Width 6399.5 Hz  
16 repetitions  
OBSERVE H1, 399.9649463 MHz  
DATA PROCESSING  
Line broadening 0.2 Hz  
FT size 65536  
Total time 1 min, 3 sec  
Acquisition date: Oct 13 2007

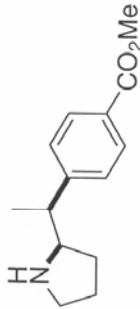

**32a**

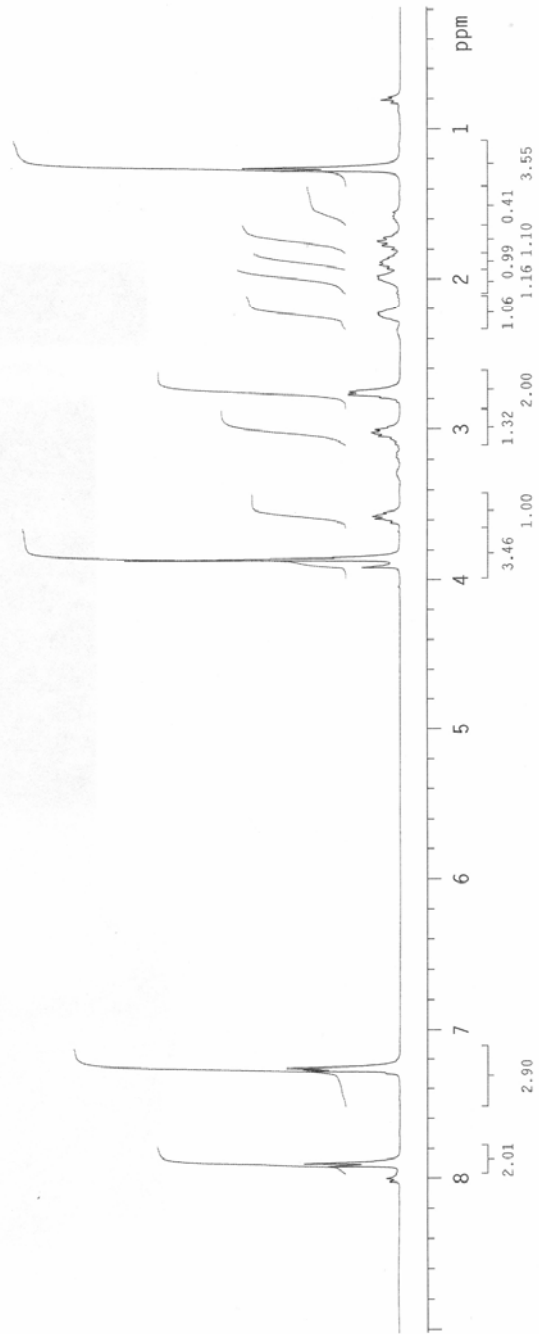

Std Carbon

File: mbb-10-21-cr-C13-400

Pulse Sequence: sz2pul

Solvent: cdcl3

Temp: 23.0 C / 296.1 K

Operator: myrabort

File: mbb-10-21-cr-C13-400

INOVA-400 "Md.Chem.LSA.UMich.Edu"

Relax. delay 0.100 sec

Pulse 45.0 degrees

Acq. time 1.300 sec

Width 24140.0 Hz

352 repetitions

OBSERVE C13, 100.5712666 MHz

DECOUPLE H1, 399.9669644 MHz

Power 39 dB

continuously on

WALTZ-16 modulated

DATA PROCESSING

Line broadening 0.8 Hz

FT size 65536

Total time 8 min, 16 sec

Acquisition date: Oct 13 2007

| INDEX | FREQUENCY PPM | HEIGHT |
|-------|---------------|--------|
| 1     | 16768.129     | 8.6    |
| 2     | 14860.826     | 10.7   |
| 3     | 13105.283     | 7.7    |
| 4     | 13078.025     | 59.0   |
| 5     | 12985.201     | 9.3    |
| 6     | 12827.549     | 7.8    |
| 7     | 12816.498     | 51.0   |
| 8     | 7776.033      | 45.7   |
| 9     | 7744.355      | 49.1   |
| 10    | 7712.677      | 46.5   |
| 11    | 6502.288      | 28.8   |
| 12    | 5235.910      | 25.7   |
| 13    | 4527.946      | 28.3   |
| 14    | 4353.349      | 23.0   |
| 15    | 2991.201      | 26.7   |
| 16    | 2377.534      | 26.1   |
| 17    | 2019.501      | 28.7   |

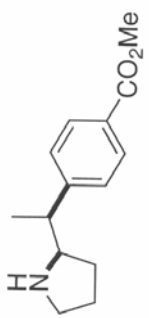

**32a**

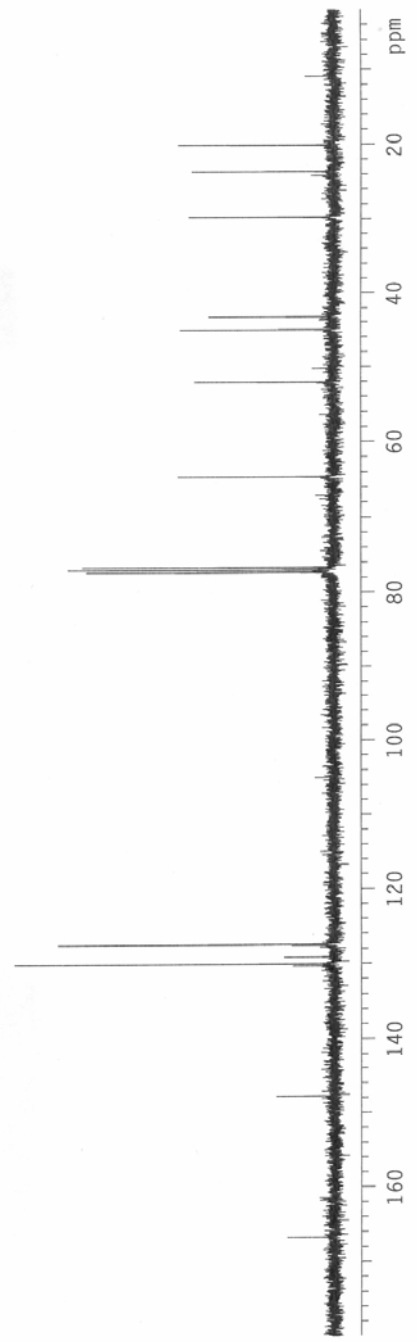

Std proton

File: mbb-10-56-HNMR-400

Pulse Sequence: s2pul

Solvent: cdcl3

Ambient temperature

Operator: myrabort

File: mbb-10-56-HNMR-400

INOVA-400 "Md.Chem.LSA.UMich.Edu"

Relax. delay 0.500 sec

Pulse 45.0 degrees

Acq. time 3.000 sec

Width 6399.5 Hz

8 repetitions

OBSERVE H1, 399.9649486 MHz

DATA PROCESSING

Line broadening 0.2 Hz

FT size 65536

Total time 0 min, 35 sec

Acquisition date: Nov 30 2007

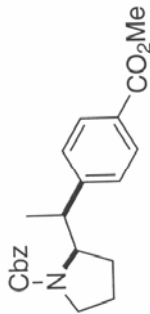

34

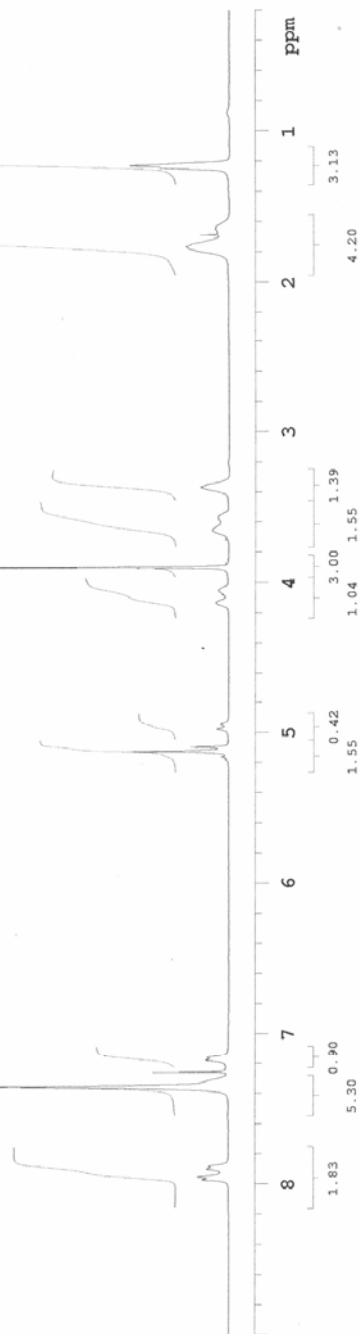



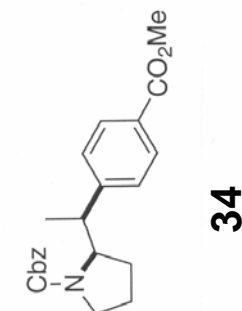

| INDEX | FREQUENCY PPM | HEIGHT  |
|-------|---------------|---------|
| 1     | 16803.186     | 167.077 |
| 2     | 15607.531     | 155.189 |
| 3     | 15001.231     | 149.160 |
| 4     | 13776.108     | 136.979 |
| 5     | 13733.379     | 136.554 |
| 6     | 13075.511     | 130.012 |
| 7     | 13018.785     | 129.448 |
| 8     | 12993.738     | 129.199 |
| 9     | 12919.332     | 128.459 |
| 10    | 12886.917     | 128.137 |
| 11    | 12863.343     | 127.903 |
| 12    | 12847.872     | 127.749 |
| 13    | 7777.203      | 77.330  |
| 14    | 7765.415      | 77.213  |
| 15    | 7744.788      | 77.008  |
| 16    | 7713.110      | 76.693  |
| 17    | 6745.830      | 67.075  |
| 18    | 6692.051      | 66.540  |
| 19    | 6341.385      | 63.054  |
| 20    | 6293.499      | 62.578  |
| 21    | 5227.502      | 51.978  |
| 22    | 4775.908      | 47.488  |
| 23    | 4762.648      | 47.356  |
| 24    | 4203.497      | 41.796  |
| 25    | 4092.992      | 40.697  |
| 26    | 2985.004      | 29.680  |
| 27    | 2705.060      | 26.897  |
| 28    | 2612.973      | 25.981  |
| 29    | 2439.849      | 24.260  |
| 30    | 2368.390      | 23.549  |
| 31    | 1348.805      | 13.411  |
| 32    | 1315.653      | 13.082  |

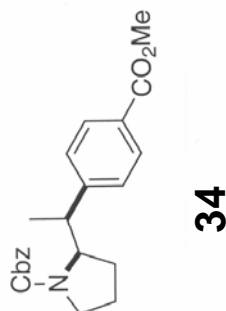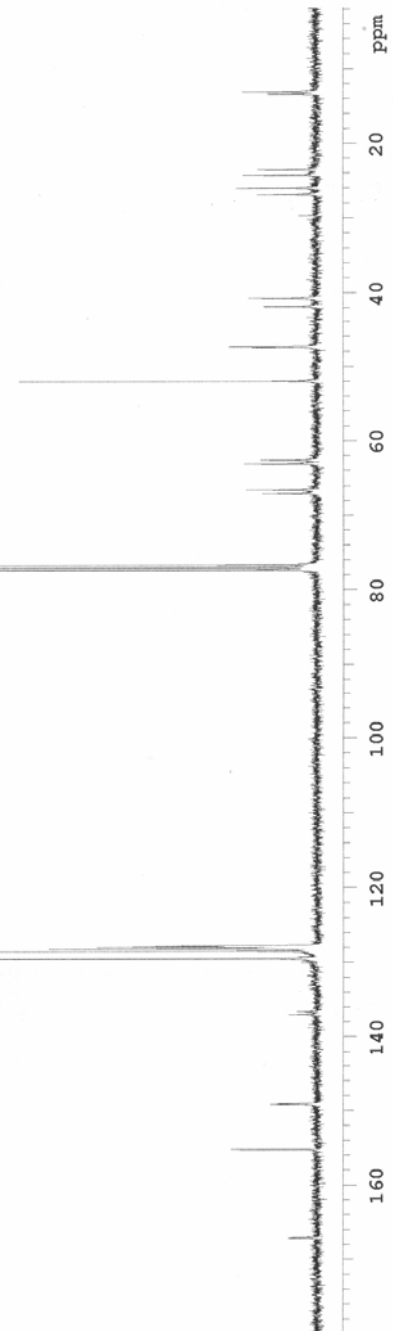

Std proton

File: mbb-10-69-HNMR-400

Pulse Sequence: sZpul

Solvent: cdcl3

Ambient temperature

Operator: Myzabert

File: mbb-10-69-HNMR-400

INOVA-400 "Kr. chem. lsa.umich.edu"

Relax. delay 0.500 sec

Pulse 45.0 degrees

Acq. time 3.000 sec

Width 6399.5 Hz

8 repetitions

OBSERVE H1, 399.9649478 MHz

DATA PROCESSING

Line broadening 0.2 Hz

FT size 65536

Total time 0 min, 35 sec

Acquisition date: Dec 14 2007

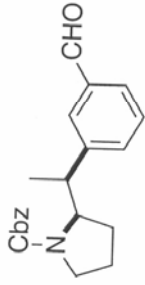

35

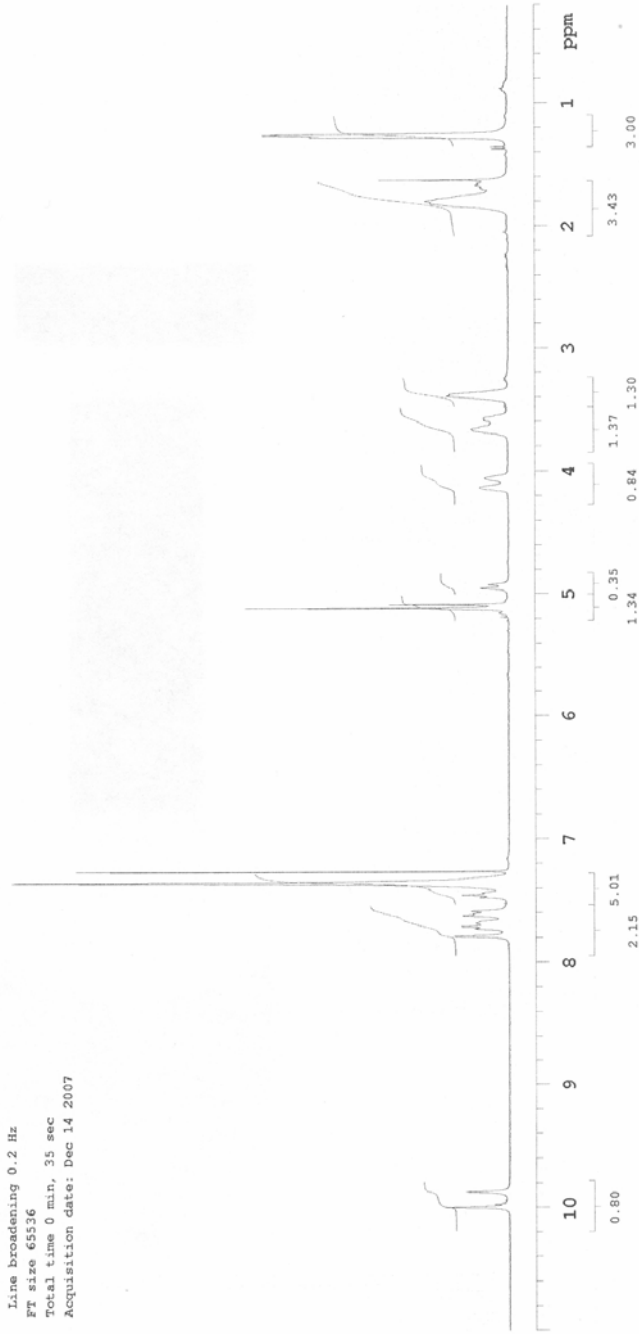

Std Carbon

File: mbb-10-69-C13-400

Pulse Sequence: #2pul

Solvent: cdcl3

Ambient temperature

Operator: myrabort

File: mbb-10-69-C13-400

INOVA-400 "Kr. chem. isa. umich.edu"

Relax. delay 0.100 sec

Pulse 30.0 degrees

Acq. time 1.300 sec

Width 24140.0 Hz

6688 repetitions

OBSERVE C13, 100.5712678 MHz

DECOUPLE H1, 399.9669644 MHz

Power 39 dB

continuously on

WALTZ-16 modulated

DATA PROCESSING

Line broadening 0.8 Hz

FT size 65536

Total time 2 hr, 37 min, 5 sec

Acquisition date: Dec 14 2007

| INDEX | FREQUENCY PPM | HEIGHT  |
|-------|---------------|---------|
| 1     | 19369.700     | 192.597 |
| 2     | 19354.230     | 192.443 |
| 3     | 15606.664     | 155.180 |
| 4     | 14567.187     | 144.844 |
| 5     | 13712.622     | 136.347 |
| 6     | 13524.028     | 134.472 |
| 7     | 13490.140     | 134.135 |
| 8     | 12955.299     | 128.817 |
| 9     | 12922.148     | 128.487 |
| 10    | 12883.103     | 128.099 |
| 11    | 12865.423     | 127.923 |
| 12    | 12844.059     | 127.711 |
| 13    | 7777.072      | J7-369- |
| 14    | 7765.285      | J7-313- |
| 15    | 7744.658      | J7-001- |
| 16    | 7712.980      | J6-692- |
| 17    | 6747.910      | 67.096  |
| 18    | 6694.868      | 66.568  |
| 19    | 6344.938      | 63.089  |
| 20    | 6305.893      | 62.701  |
| 21    | 4771.358      | 47.443  |
| 22    | 4761.781      | 47.347  |
| 23    | 4177.582      | 41.539  |
| 24    | 4062.658      | 40.396  |
| 25    | 2708.613      | 26.932  |
| 26    | 2612.106      | 25.973  |
| 27    | 2441.193      | 24.273  |
| 28    | 2367.523      | 23.541  |
| 29    | 1368.565      | 13.608  |
| 30    | 1329.520      | 13.220  |

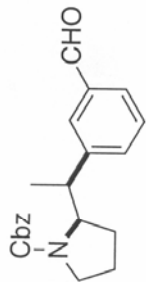

35

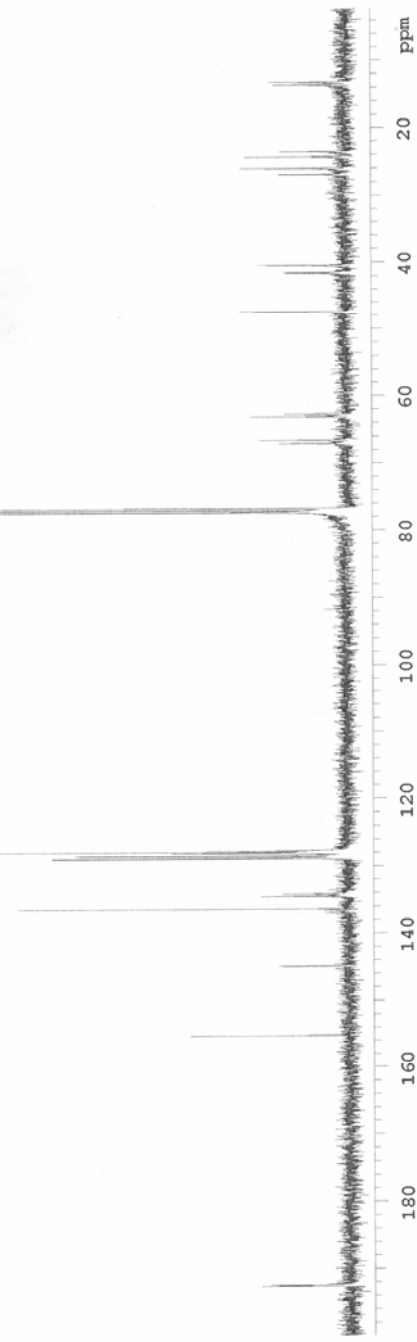

Std proton

File: mbb-9-201-HNMR-400

Pulse Sequence: s2pul

Solvent: cdcl3

Temp: 23.0 C / 296.1 K

Operator: myrabort

File: mbb-9-201-HNMR-400

INOVA-400 "M.D.Chem.LSA,UMich.Edu"

Relax. delay 0.500 sec

Pulse 45.0 degrees

Acq. time 3.000 sec

Width 6399.5 Hz

8 repetitions

OBSERVE H1, 399.9649520 MHz

DATA PROCESSING

Line broadening 0.2 Hz

FT size 65536

Total time 0 min, 35 sec

Acquisition date: Sep 21 2007

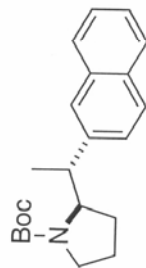

36

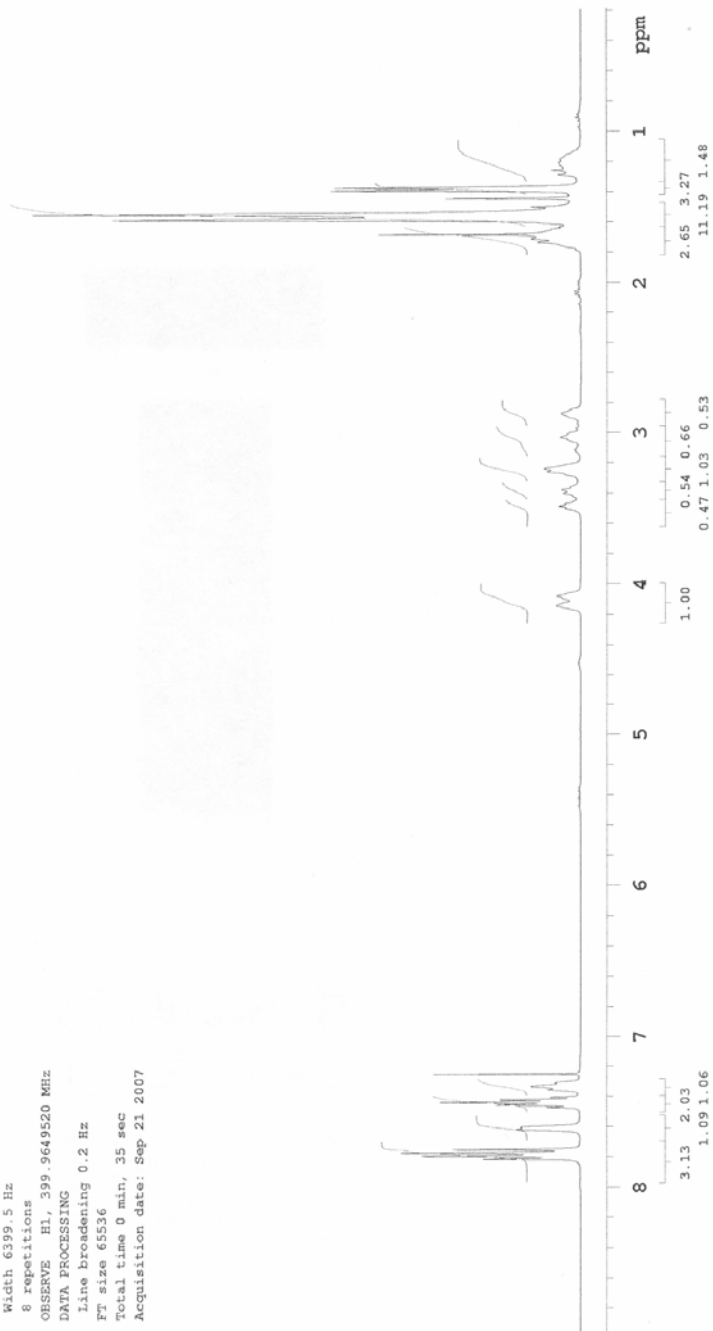

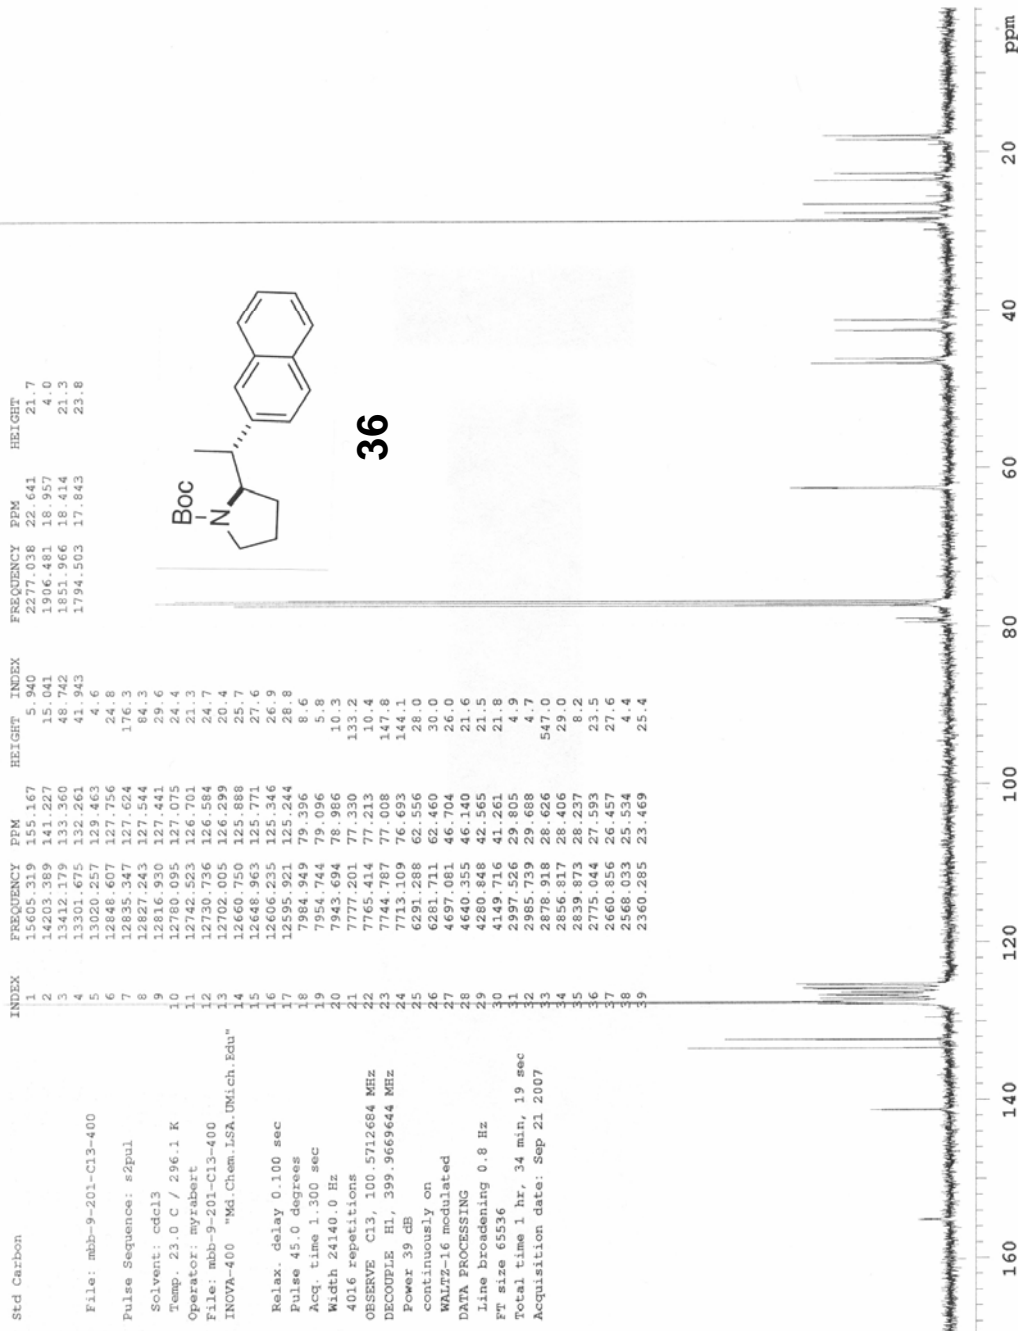

| INDEX | FREQUENCY PPM | HEIGHT  | INDEX | FREQUENCY PPM | HEIGHT  |
|-------|---------------|---------|-------|---------------|---------|
| 1     | 15605.319     | 155.167 | 5     | 13020.257     | 129.463 |
| 2     | 14203.389     | 141.227 | 6     | 12848.607     | 127.756 |
| 3     | 13412.179     | 133.360 | 7     | 12835.347     | 127.624 |
| 4     | 13301.675     | 132.261 | 8     | 12827.243     | 127.544 |
| 5     | 13020.257     | 129.463 | 9     | 12816.930     | 127.441 |
| 6     | 12848.607     | 127.756 | 10    | 12780.095     | 127.075 |
| 7     | 12835.347     | 127.624 | 11    | 12742.523     | 126.701 |
| 8     | 12827.243     | 127.544 | 12    | 12730.736     | 126.584 |
| 9     | 12816.930     | 127.441 | 13    | 12702.005     | 126.299 |
| 10    | 12780.095     | 127.075 | 14    | 12660.750     | 125.888 |
| 11    | 12742.523     | 126.701 | 15    | 12648.963     | 125.771 |
| 12    | 12730.736     | 126.584 | 16    | 12606.235     | 125.346 |
| 13    | 12702.005     | 126.299 | 17    | 12595.921     | 125.244 |
| 14    | 12660.750     | 125.888 | 18    | 7984.949      | 79.396  |
| 15    | 12648.963     | 125.771 | 19    | 7954.744      | 79.096  |
| 16    | 12606.235     | 125.346 | 20    | 7943.694      | 78.966  |
| 17    | 12595.921     | 125.244 | 21    | 7777.201      | 77.330  |
| 18    | 7984.949      | 79.396  | 22    | 7765.414      | 77.213  |
| 19    | 7954.744      | 79.096  | 23    | 7744.787      | 77.008  |
| 20    | 7943.694      | 78.966  | 24    | 7713.109      | 76.693  |
| 21    | 7777.201      | 77.330  | 25    | 6291.288      | 62.556  |
| 22    | 7765.414      | 77.213  | 26    | 6281.711      | 62.460  |
| 23    | 7744.787      | 77.008  | 27    | 4697.081      | 46.704  |
| 24    | 7713.109      | 76.693  | 28    | 4640.355      | 46.140  |
| 25    | 6291.288      | 62.556  | 29    | 4280.848      | 42.565  |
| 26    | 6281.711      | 62.460  | 30    | 4149.716      | 41.261  |
| 27    | 4697.081      | 46.704  | 31    | 2997.526      | 29.805  |
| 28    | 4640.355      | 46.140  | 32    | 2985.739      | 29.688  |
| 29    | 4280.848      | 42.565  | 33    | 2878.918      | 28.626  |
| 30    | 4149.716      | 41.261  | 34    | 2856.817      | 28.406  |
| 31    | 2997.526      | 29.805  | 35    | 2839.873      | 28.237  |
| 32    | 2985.739      | 29.688  | 36    | 2775.044      | 27.593  |
| 33    | 2878.918      | 28.626  | 37    | 2660.856      | 26.457  |
| 34    | 2856.817      | 28.406  | 38    | 2568.033      | 25.534  |
| 35    | 2839.873      | 28.237  | 39    | 2360.285      | 23.469  |
| 36    | 2775.044      | 27.593  |       |               |         |
| 37    | 2660.856      | 26.457  |       |               |         |
| 38    | 2568.033      | 25.534  |       |               |         |
| 39    | 2360.285      | 23.469  |       |               |         |

Std Carbon

File: mbb-9-201-C13-400

Pulse Sequence: sZpul

Solvent: cdcl3

Temp: 23.0 C / 296.1 K

Operator: myrabort

File: mbb-9-201-C13-400

INOVN-400 "Ml.Chem.LSA,UMich.Edu"

Relax. delay 0.100 sec

Pulse 45.0 degrees

Acq. time 1.300 sec

Width 24140.0 Hz

4016 repetitions

OBSERVE C13, 100.5712684 MHz

DECOUPLE H1, 399.9669644 MHz

Power 39 dB

continuously on

WALTZ-16 modulated

DATA PROCESSING

Line broadening 0.8 Hz

FT size 65536

Total time 1 hr, 34 min, 19 sec

Acquisition date: Sep 21 2007

STANDARD PROTON PARAMETERS

File: mbb-9-204-HNMR-400  
Pulse Sequence: s2pul  
Solvent: cdcl3  
Ambient temperature  
Operator: myrabert  
File: mbb-9-204-HNMR-400  
VMRS-401 "Md.Chem.LSA,UMich.Edu"

Relax. delay 1.000 sec  
Pulse 45.0 degrees  
Acq. time 2.556 sec  
Width 6410.3 Hz  
8 repetitions  
OBSERVE H1, 400.5297577 MHZ  
DATA PROCESSING  
FT size 32768  
Total time 0 min, 35 sec  
Acquisition date: May 20 2008

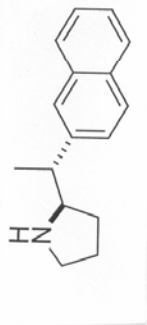

**36a**

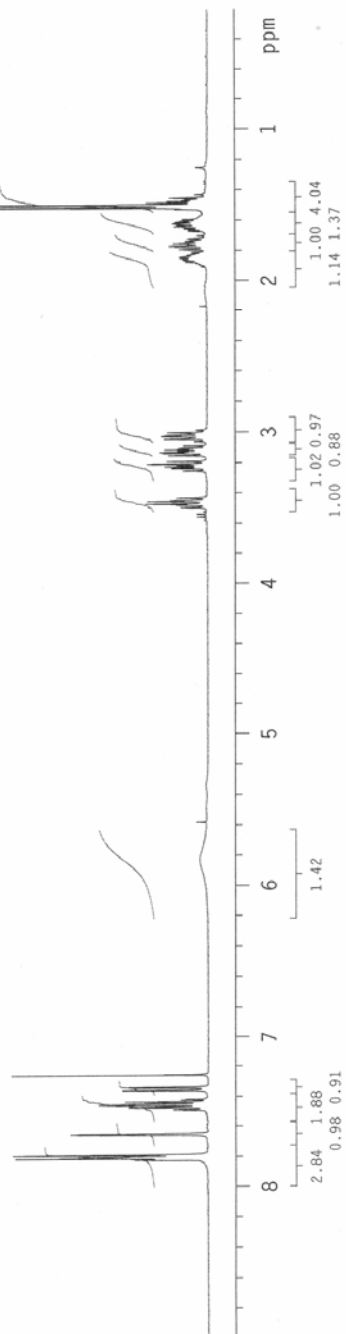

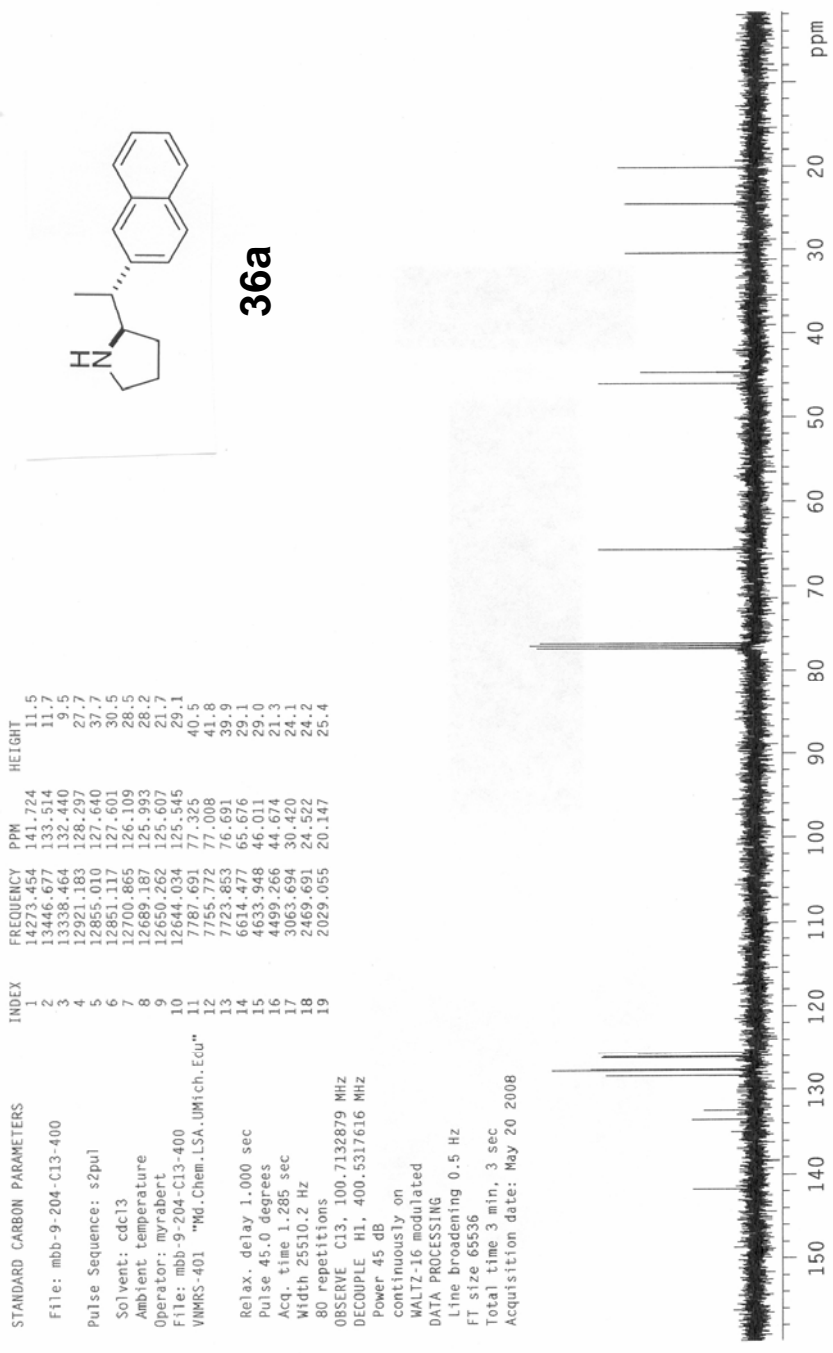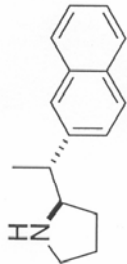

**36a**

STANDARD CARBON PARAMETERS

File: mbb-9-204-C13-400

Pulse Sequence: s2pul

Solvent: cdcl3

Ambient temperature

Operator: myrabort

File: mbb-9-204-C13-400

VNMRS-401 "Md.Chem.LSA,UMich.Edu"

Relax. delay 1.000 sec

Pulse 45.0 degrees

Acq. time 1.285 sec

Width 25510.2 Hz

80 repetitions

OBSERVE C13, 100.7132879 MHz

DECUPLE H1, 400.5317616 MHz

Power 45 dB

continuously on

WALTZ-16 modulated

DATA PROCESSING

Line broadening 0.5 Hz

FT size 65536

Total time 3 min, 3 sec

Acquisition date: May 20 2008

Standard Proton

File: mbb-10-6-HNMR-500

Pulse Sequence: s2pul

Solvent: cdcl3

Ambient temperature

Operator: myrabert

File: mbb-10-6-HNMR-500

INOVA-500 "Md.Chem.LSA.UMich.Edu"

Relax. delay 0.100 sec

Pulse 45.0 degrees

Acq. time 3.000 sec

Width 8003.2 Hz

8 repetitions

OBSERVE H1, 499.9042609 MHz

DATA PROCESSING

Line broadening 0.2 Hz

FT size 65536

Total time 0 min, 31 sec

Acquisition date: Oct 4 2007

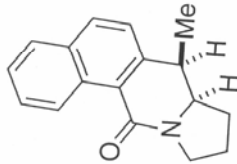

**S3**

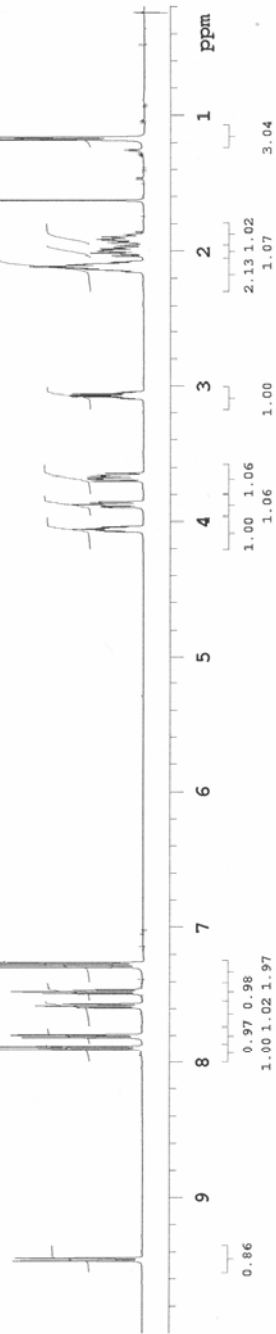



Std Carbon

File: mbb-10-6-C13-400

Pulse Sequence: s2pul

Solvent: cdcl3

Temp. 23.0 C / 296.1 K

Operator: myrabort

File: mbb-10-6-C13-400

INOVA-400 "Md.Chem.ISA.UMich.Edu"

Relax. delay 0.100 sec

Pulse 45.0 degrees

Acq. time 1.300 sec

Width 24140.0 Hz

512 repetitions

OBSERVE C13, 100.5712662 MHz

DECOUPLE H1, 399.9669644 MHz

Power 39 dB

continuously on

WALTZ-16 modulated

DATA PROCESSING

Line broadening 0.8 Hz

FT size 65536

Total time 12 min, 1 sec

Acquisition date: Oct 4 2007

| INDEX | FREQUENCY FPM | HEIGHT  |
|-------|---------------|---------|
| 1     | 14562.158     | 144.794 |
| 2     | 13390.076     | 133.140 |
| 3     | 13320.090     | 132.444 |
| 4     | 13236.844     | 131.617 |
| 5     | 12872.917     | 127.998 |
| 6     | 12825.032     | 127.522 |
| 7     | 12756.519     | 126.841 |
| 8     | 12637.911     | 125.661 |
| 9     | 12582.659     | 125.112 |
| 10    | 7776.463      | 77.323  |
| 11    | 7748.785      | 77.008  |
| 12    | 7712.370      | 76.686  |
| 13    | 5859.583      | 58.263  |
| 14    | 4604.992      | 45.788  |
| 15    | 3796.101      | 37.745  |
| 16    | 2871.549      | 28.552  |
| 17    | 2380.911      | 23.674  |
| 18    | 1497.614      | 14.891  |

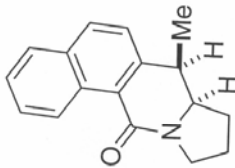

S3

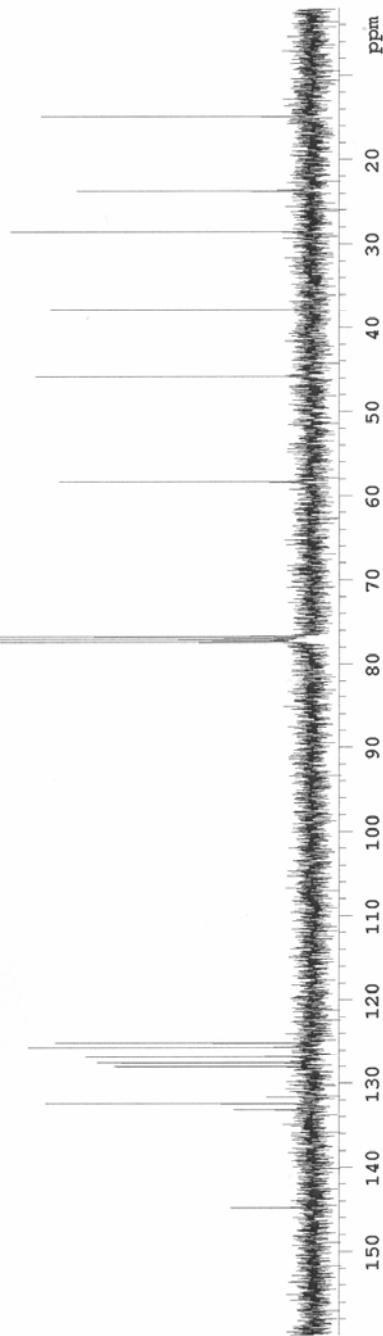

Std proton

File: mbb-10-15-HNMR-400

Pulse Sequence: s2pal

Solvent: cdcl3

Ambient temperature

Operator: myrabort

File: mbb-10-15-HNMR-400

INOVA-400 "Md.Chem.LSA,UMich.Edu"

Relax. delay 0.500 sec

Pulse 45.0 degrees

Acq. time 3.000 sec

Width 6399.5 Hz

16 repetitions

OBSERVE H1, 399.9649400 MHz

DATA PROCESSING

Line broadening 0.2 Hz

Ft size 65536

Total time 1 min, 3 sec

Acquisition date: Oct 10 2007

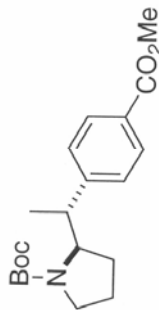

37

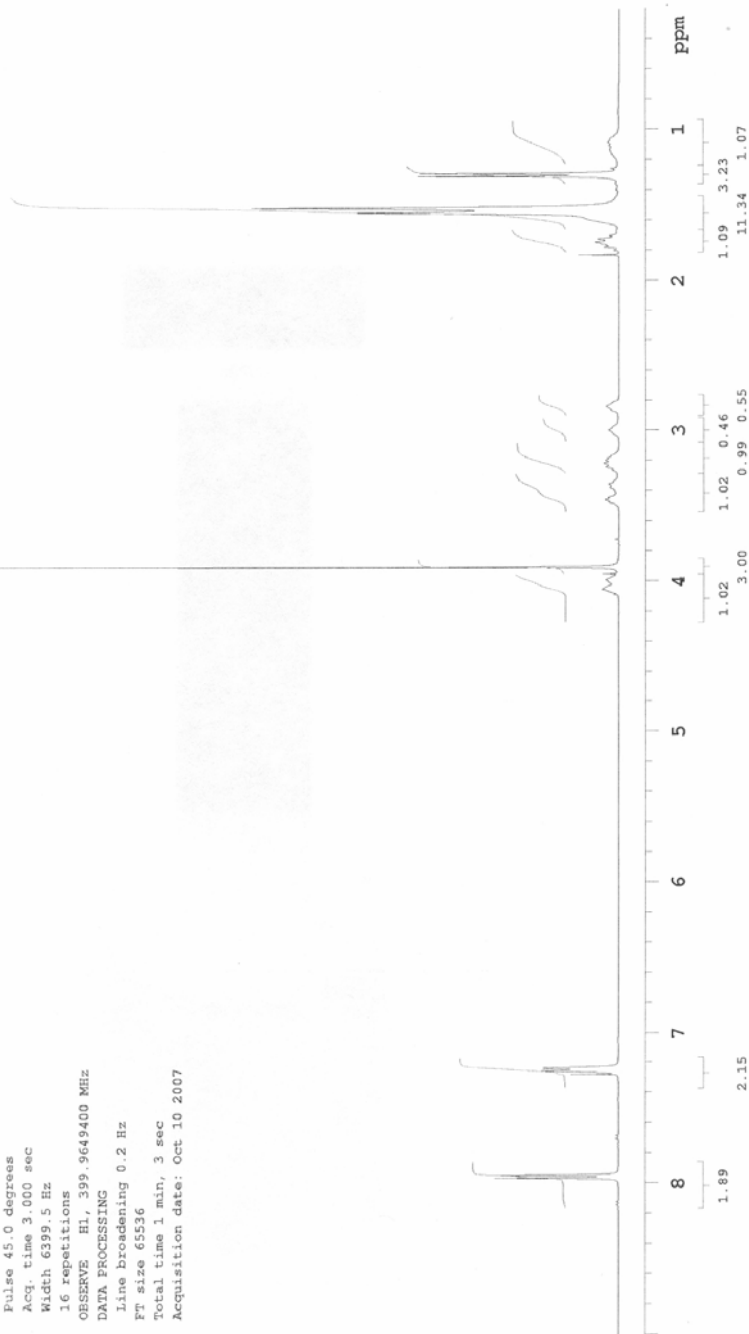

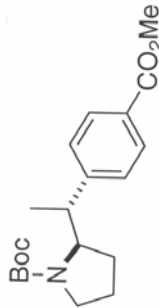

37

| INDEX | FREQUENCY PPM | HEIGHT  |
|-------|---------------|---------|
| 1     | 16808.356     | 167.129 |
| 2     | 15590.599     | 155.020 |
| 3     | 14982.826     | 148.977 |
| 4     | 13089.521     | 130.152 |
| 5     | 13018.798     | 129.448 |
| 6     | 12995.961     | 129.221 |
| 7     | 12904.611     | 128.313 |
| 8     | 12878.826     | 128.057 |
| 9     | 12791.896     | 127.192 |
| 10    | 7992.330      | 79.469  |
| 11    | 7954.022      | 79.068  |
| 12    | 7776.479      | 77.323  |
| 13    | 7765.428      | 77.213  |
| 14    | 7744.801      | 77.008  |
| 15    | 7713.123      | 76.693  |
| 16    | 6274.358      | 62.387  |
| 17    | 6264.781      | 62.292  |
| 18    | 5225.305      | 51.956  |
| 19    | 4699.305      | 46.726  |
| 20    | 4643.316      | 46.169  |
| 21    | 4260.972      | 42.368  |
| 22    | 4110.686      | 40.873  |
| 23    | 2870.829      | 28.545  |
| 24    | 2748.537      | 27.329  |
| 25    | 2624.773      | 26.059  |
| 26    | 2349.986      | 23.366  |
| 27    | 2266.002      | 22.531  |
| 28    | 1801.148      | 17.909  |
| 29    | 1732.635      | 17.228  |

Std Carbon

File: mbb-10-15-C13-400

Pulse Sequence: s2pul

Solvent: cdcl3

Ambient temperature

Operator: myrbert

File: mbb-10-15-C13-400

INOVA-400 "Ml.Chem.LSA.DM.ch.Bdu"

Relax. delay 0.100 sec

Pulse 45.0 degrees

Acq. time 1.300 sec

Width 24140.0 Hz

1136 repetitions

OBSERVE C13, 100.5712691 MHZ

DECOUPLE H1, 399.9669644 MHZ

Power 39 dB

continuously on

MALTZ-16 modulated

DATA PROCESSING

Line broadening 0.8 Hz

FT size 65536

Total time 26 min, 41 sec

Acquisition date: Oct 10 2007

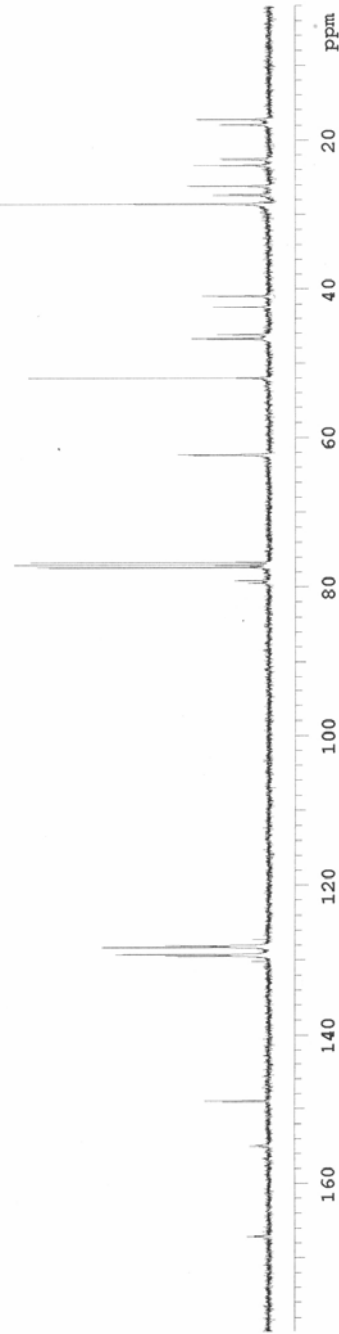

Std proton

File: mbb-10-18-cr-HNMR-400

Pulse Sequence: s2pul

Solvent: cdc13

Ambient temperature

Operator: myrabert

File: mbb-10-18-cr-HNMR-400

INOVA-400 "Kr.chem.lsa.umich.edu"

Relax. delay 0.500 sec

Pulse 45.0 degrees

Acq. time 3.000 sec

Width 6399.5 Hz

8 repetitions

OBSERVE H1, 399.9649402 MHz

DATA PROCESSING

Line broadening 0.2 Hz

FT size 65536

Total time 0 min, 35 sec

Acquisition date: Oct 11 2007

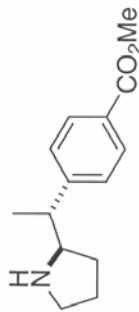

**37a**

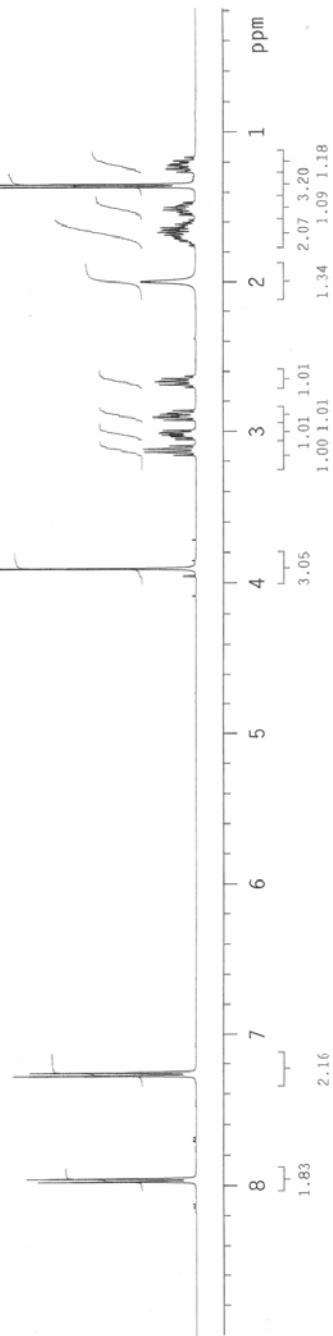

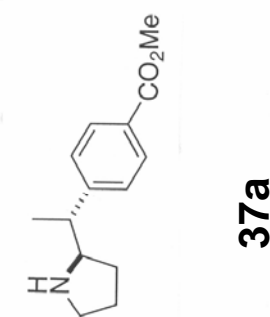

| INDEX | FREQUENCY PPM | HEIGHT  |
|-------|---------------|---------|
| 1     | 16799.040     | 167.036 |
| 2     | 15207.043     | 151.207 |
| 3     | 13036.740     | 129.627 |
| 4     | 12881.298     | 128.081 |
| 5     | 12827.519     | 127.547 |
| 6     | 7776.004      | 77.318  |
| 7     | 7744.326      | 77.003  |
| 8     | 7711.911      | 76.681  |
| 9     | 6519.202      | 64.822  |
| 10    | 5223.356      | 51.937  |
| 11    | 4692.199      | 46.655  |
| 12    | 4650.208      | 46.238  |
| 13    | 3048.634      | 30.313  |
| 14    | 2537.367      | 25.230  |
| 15    | 1980.426      | 19.692  |

Std Carbon  
 File: mbb-10-18-cr-C13-400  
 Pulse Sequence: sZpul  
 Solvent: cdc13  
 Ambient temperature  
 Operator: myrabort  
 File: mbb-10-18-cr-C13-400  
 INOVA-400 "Kr.chem.lsa.umich.edu"  
 Relax. delay 0.100 sec  
 Pulse 45.0 degrees  
 Acq. time 1.300 sec  
 Width 24140.0 Hz  
 64 repetitions  
 OBSERVE C13, 100.6712703 MHz  
 DECOUPLE H1, 399.9669644 MHz  
 Power 39 dB  
 continuously on  
 WALTZ-16 modulated  
 DATA PROCESSING  
 Line broadening 0.8 Hz  
 FT size 65536  
 Total time 1 min, 30 sec  
 Acquisition date: Oct 11 2007

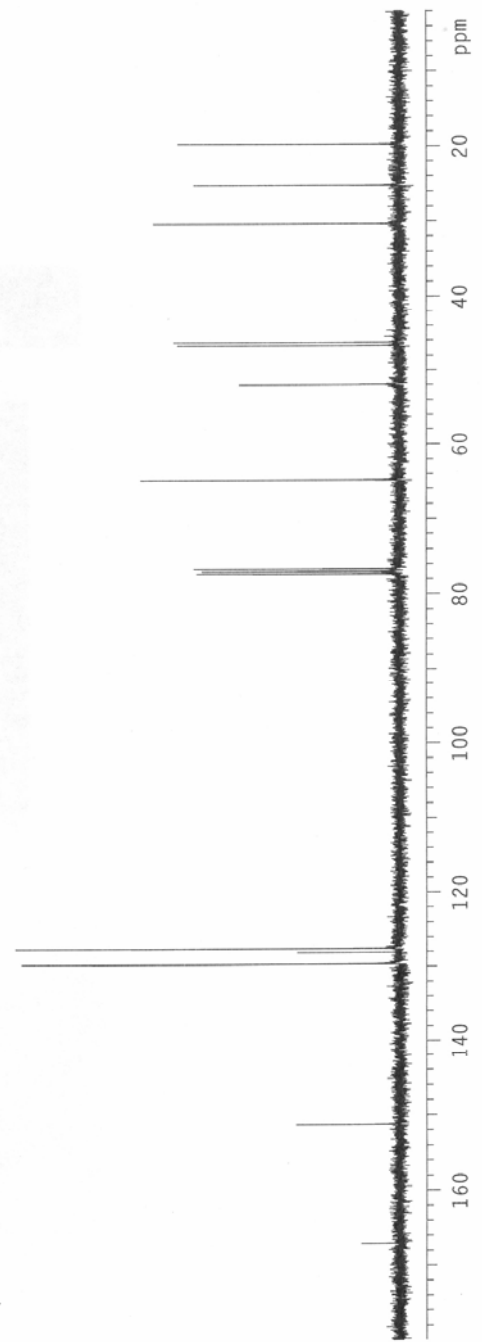

Std proton

File: mbb-10-24-HNMR-400

Pulse Sequence: s2pul

Solvent: cdcl3

Temp. 23.0 C / 296.1 K

Operator: myzabert

File: mbb-10-24-HNMR-400

INOVA-400 "Md.Chem.LSA,UMich.Edu"

Relax. delay 0.500 sec

Pulse 45.0 degrees

Acq. time 3.000 sec

Width 6399.5 Hz

8 repetitions

OBSERVE H1, 399.9649455 MHz

DATA PROCESSING

Line broadening 0.2 Hz

FT size 65536

Total time 0 min, 35 sec

Acquisition date: Oct 18 2007

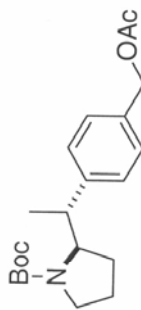

38

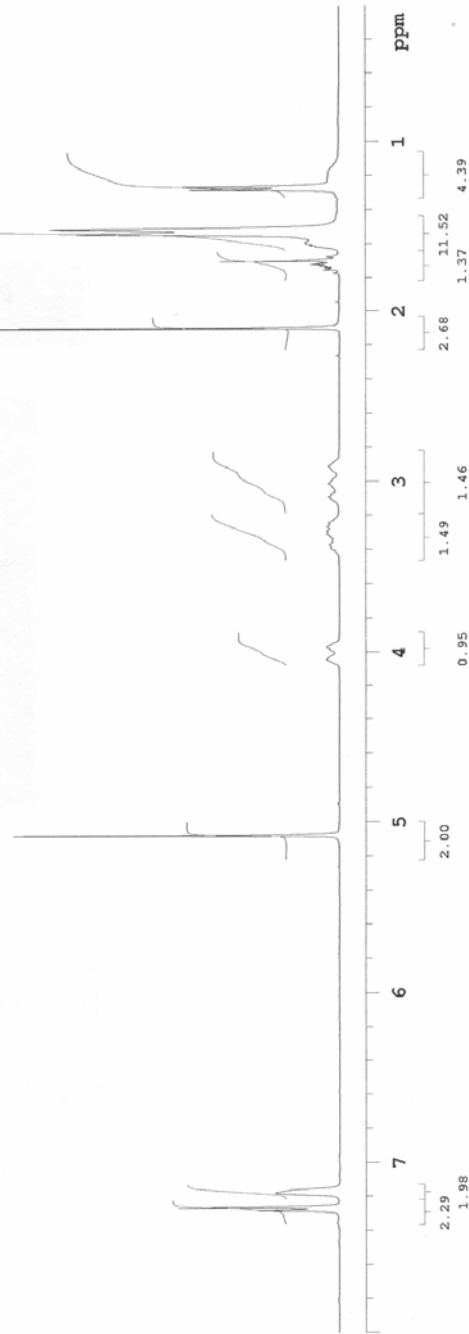

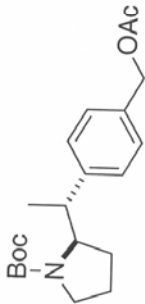

**38**

Std Carbon

| INDEX | FREQUENCY FPM | HEIGHT  |
|-------|---------------|---------|
| 1     | 17189.274     | 170.916 |
| 2     | 15599.487     | 155.109 |
| 3     | 14456.873     | 143.748 |
| 4     | 13471.912     | 133.954 |
| 5     | 13452.758     | 133.763 |
| 6     | 12917.181     | 128.438 |
| 7     | 12893.607     | 128.204 |
| 8     | 12878.137     | 128.050 |
| 9     | 7981.327      | 79.360  |
| 10    | 7943.755      | 78.966  |
| 11    | 7776.526      | 77.324  |
| 12    | 7765.475      | 77.214  |
| 13    | 7744.848      | 77.009  |
| 14    | 7712.433      | 76.666  |
| 15    | 6651.593      | 66.138  |
| 16    | 6281.035      | 62.454  |
| 17    | 6270.722      | 62.351  |
| 18    | 4697.142      | 46.705  |
| 19    | 4641.153      | 46.148  |
| 20    | 4233.761      | 42.097  |
| 21    | 4120.310      | 40.969  |
| 22    | 2874.559      | 28.582  |
| 23    | 2762.582      | 27.469  |
| 24    | 2652.077      | 26.370  |
| 25    | 2353.716      | 23.403  |
| 26    | 2269.733      | 22.568  |
| 27    | 2115.764      | 21.037  |
| 28    | 1828.453      | 18.181  |
| 29    | 1784.251      | 17.741  |

File: mbb-10-24-C13-400  
Pulse Sequence: s2pul  
Solvent: cdcl3  
Temp. 23.0 C / 296.1 K  
Operator: myrabort  
File: mbb-10-24-C13-400  
INOVA-400 "Md.Chem.LSA.UMich.Edu"

Relax. delay 0.100 sec  
Pulse 45.0 degrees  
Acq. time 1.300 sec  
Width 24140.0 Hz  
3632 repetitions  
OBSERVE C13, 100.5712676 MHz  
DECOUPLE H1, 399.9669644 MHz  
Power 39 dB  
continuously on  
WALTZ-16 modulated  
DATA PROCESSING  
Line broadening 0.8 Hz  
FT size 65536  
Total time 1 hr, 25 min, 18 sec  
Acquisition date: Oct 18 2007

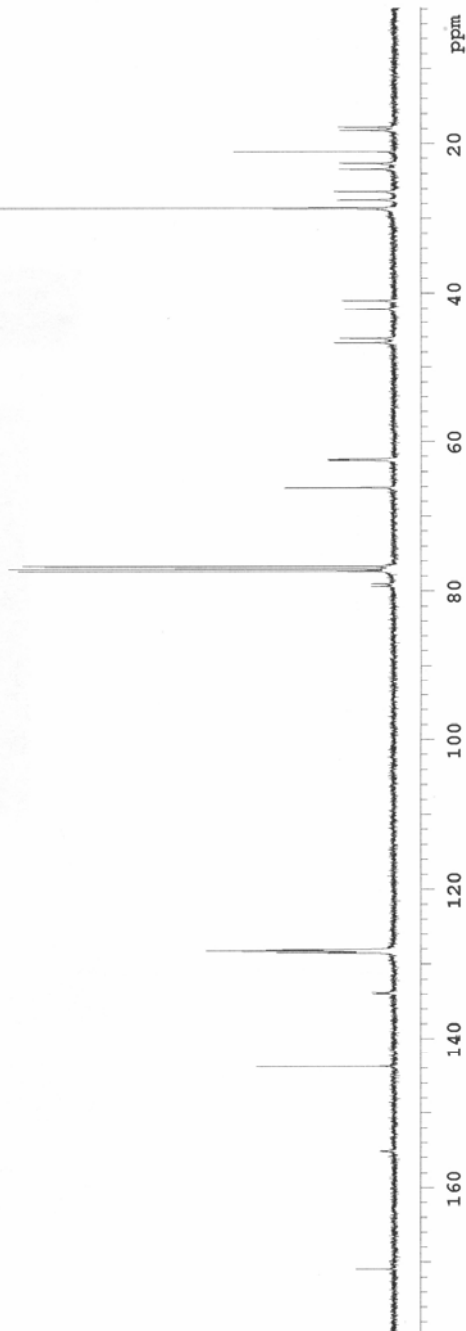

Standard Proton

File: mbb-10-31-HNMR-cr-500

Pulse Sequence: s2pu1

Solvent: cdcl3

Ambient temperature

Operator: myrabert

File: mbb-10-31-HNMR-cr-500

INOYA-500 "Kr.chem.lsa.umich.edu"

Relax. delay 0.100 sec

Pulse 45.0 degrees

Acq. time 3.000 sec

Width 8003.2 Hz

8 repetitions

OBSERVE H1, 499.9042566 MHz

DATA PROCESSING

Line broadening 0.2 Hz

FT size 65536

Total time 0 min, 31 sec

Acquisition date: Oct 18 2007

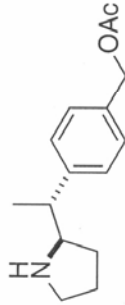

**38a**

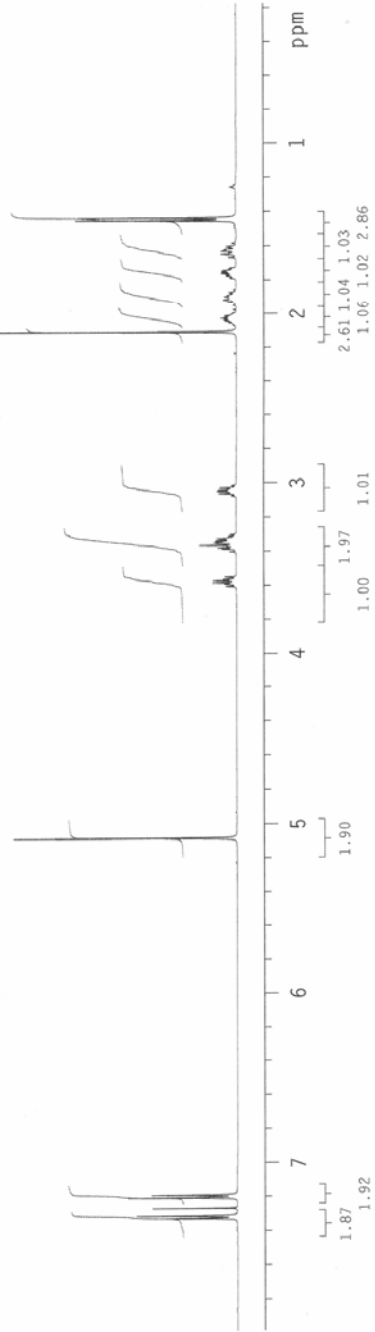



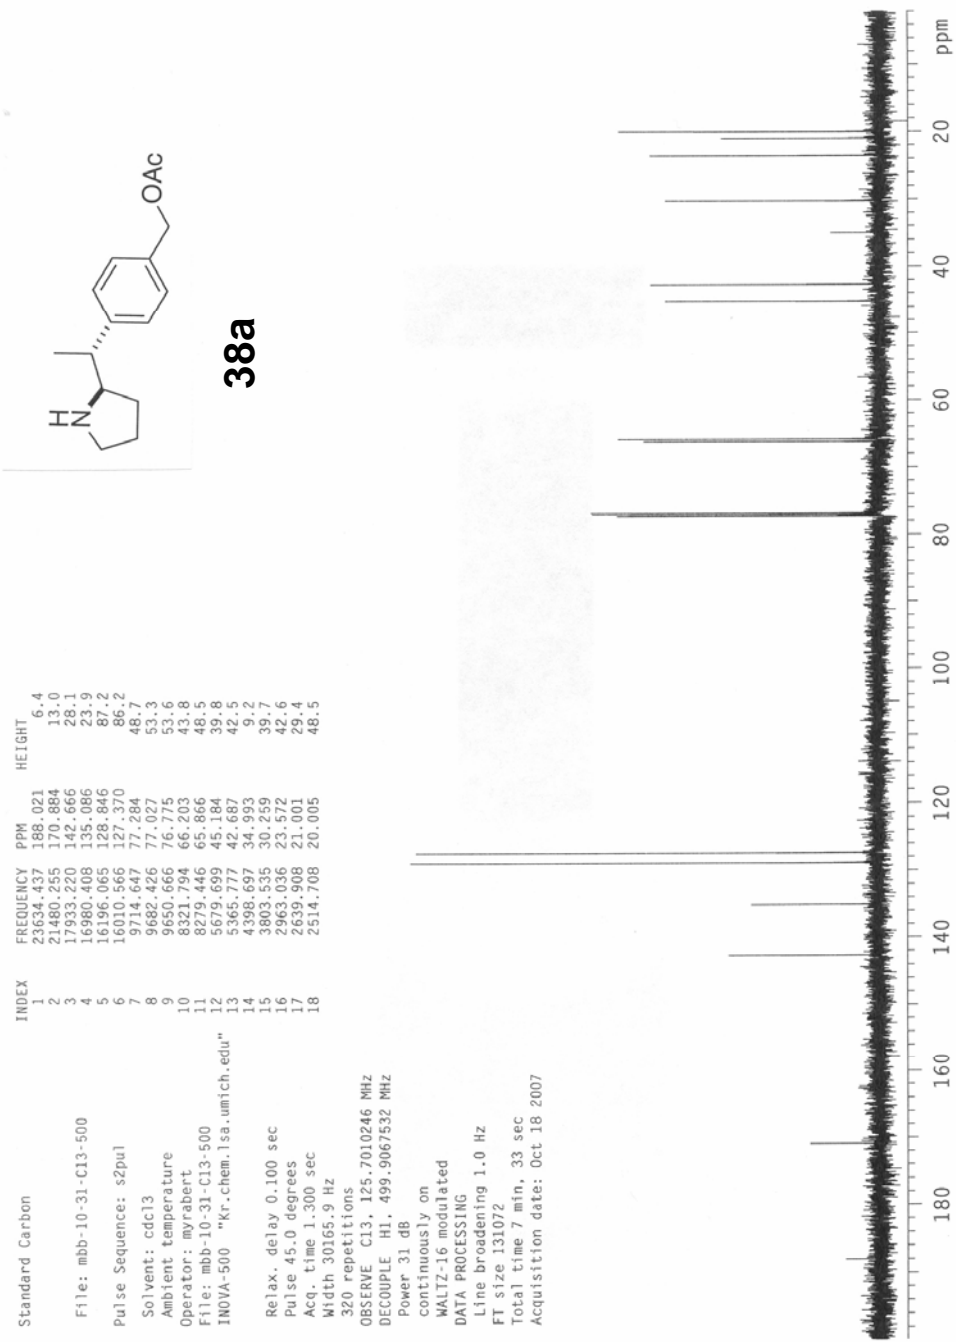

Std proton

File: mbb-10-72-HNMR-400

Pulse Sequence: s2pul

Solvent: cdcl3

Ambient temperature

Operator: myrabort

File: mbb-10-72-HNMR-400

INOVA-400 "M4.Chem.LSA.UMich.Edu"

Relax. delay 0.500 sec

Pulse 45.0 degrees

Acq. time 3.000 sec

Width 6399.5 Hz

8 repetitions

OBSERVE H1, 399.9649445 MHz

DATA PROCESSING

Line broadening 0.2 Hz

FT size 65536

Total time 0 min, 35 sec

Acquisition date: Dec 17 2007

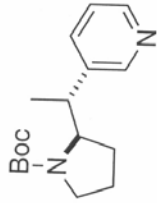

39

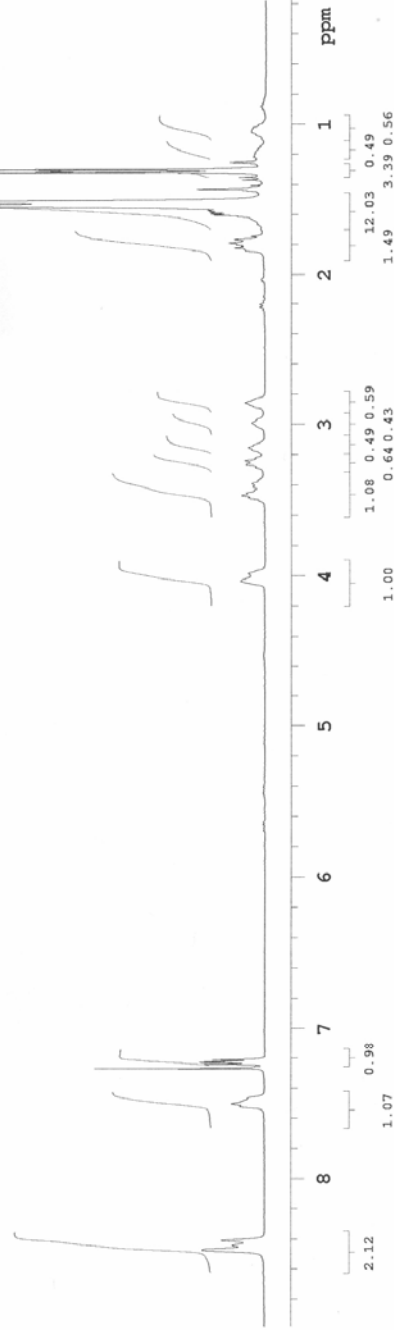



Std proton

File: mbb-10-50-HNMR-400

Pulse Sequence: s2pul

Solvent: cdcl3

Temp. 23.0 C / 296.1 K

Operator: myrabert

File: mbb-10-50-HNMR-400

INOVA-400 "Md.Chem.LSA,UMich.Edu"

Relax. delay 0.500 sec

Pulse 45.0 degrees

Acq. time 3.000 sec

Width 6399.5 Hz

8 repetitions

OBSERVE H1, 399.9649477 MHz

DATA PROCESSING

Line broadening 0.2 Hz

FT size 65536

Total time 0 min, 35 sec

Acquisition date: Nov 28 2007

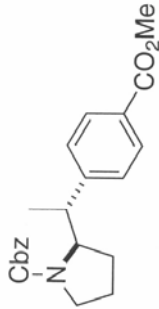

40

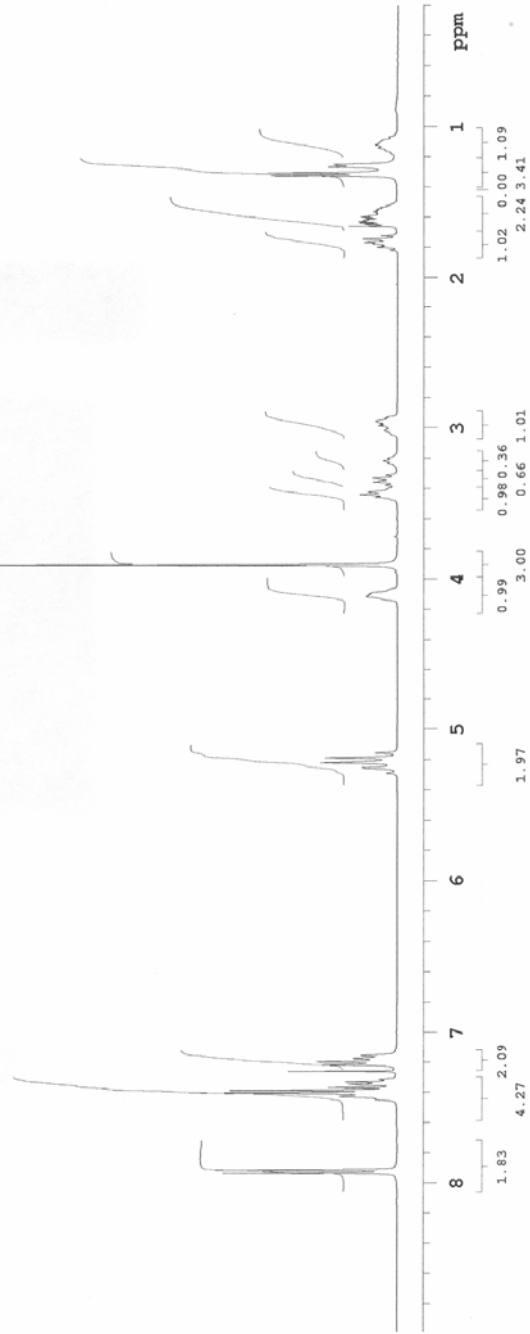

Std Carbon

File: mbb-10-50-C13-400

Pulse Sequence: s2pul

Solvent: cdcl3

Temp. 23.0 C / 296.1 K

Operator: myrabort

File: mbb-10-50-C13-400

INOVA-400 "Md.Chem.LSA.UMi.ch.Edh"

Relax. delay 0.100 sec

Pulse 30.0 degrees

Acq. time 1.300 sec

Width 24140.0 Hz

3680 repetitions

OBSERVE C13, 100.5712684 MHz

DECOUPLE H1, 399.9669644 MHz

Power 39 dB

continuously on

WALTZ-16 modulated

DATA PROCESSING

Line broadening 0.8 Hz

FT size 65536

Total time 1 hr, 26 min, 26 sec

Acquisition date: Nov 28 2007

| INDEX | FREQUENCY FPM | HEIGHT  |
|-------|---------------|---------|
| 1     | 16806.146     | 167.107 |
| 2     | 15623.014     | 155.343 |
| 3     | 14948.938     | 148.640 |
| 4     | 14939.361     | 148.545 |
| 5     | 13793.064     | 137.147 |
| 6     | 13759.913     | 136.818 |
| 7     | 13017.325     | 129.434 |
| 8     | 13005.538     | 129.317 |
| 9     | 12920.081     | 128.467 |
| 10    | 12903.137     | 128.298 |
| 11    | 12885.456     | 128.123 |
| 12    | 12879.563     | 128.064 |
| 13    | 12864.829     | 127.918 |
| 14    | 12852.305     | 127.793 |
| 15    | 7776.479      | 77.323  |
| 16    | 7764.692      | 77.206  |
| 17    | 7744.801      | 77.008  |
| 18    | 7712.386      | 76.686  |
| 19    | 6738.476      | 67.002  |
| 20    | 6699.431      | 66.614  |
| 21    | 6331.820      | 62.959  |
| 22    | 6276.568      | 62.409  |
| 23    | 5229.725      | 52.000  |
| 24    | 4708.882      | 46.821  |
| 25    | 4682.361      | 46.558  |
| 26    | 4238.134      | 42.141  |
| 27    | 4112.159      | 40.888  |
| 28    | 2984.280      | 29.673  |
| 29    | 2740.434      | 27.249  |
| 30    | 2627.719      | 26.128  |
| 31    | 2354.406      | 23.410  |
| 32    | 2271.159      | 22.583  |
| 33    | 1776.837      | 17.667  |
| 34    | 1745.159      | 17.352  |

40

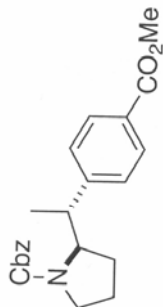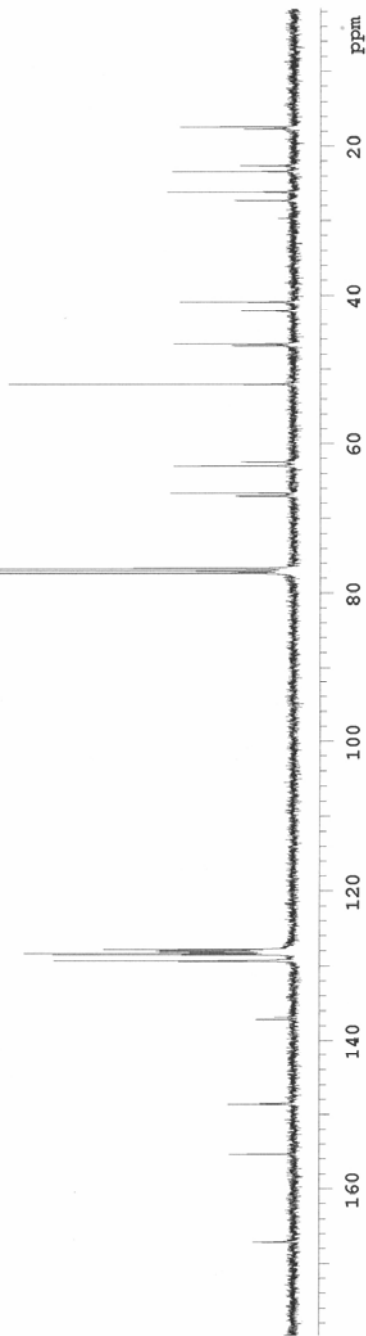

Std proton

File: mbb-10-66-HNMR-400

Pulse Sequence: s2pul

Solvent: cdcl3

Ambient temperature

Operator: myrabort

File: mbb-10-66-HNMR-400

INOVA-400 "Md.Chem.LSA.UMich.Edu"

Relax. delay 0.500 sec

Pulse 45.0 degrees

Acq. time 3.000 sec

Width 6399.5 Hz

8 repetitions

OBSERVE H1, 399.9649467 MHz

DATA PROCESSING

Line broadening 0.2 Hz

FT size 65536

Total time 0 min, 35 sec

Acquisition date: Dec 11 2007

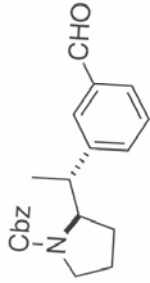

41

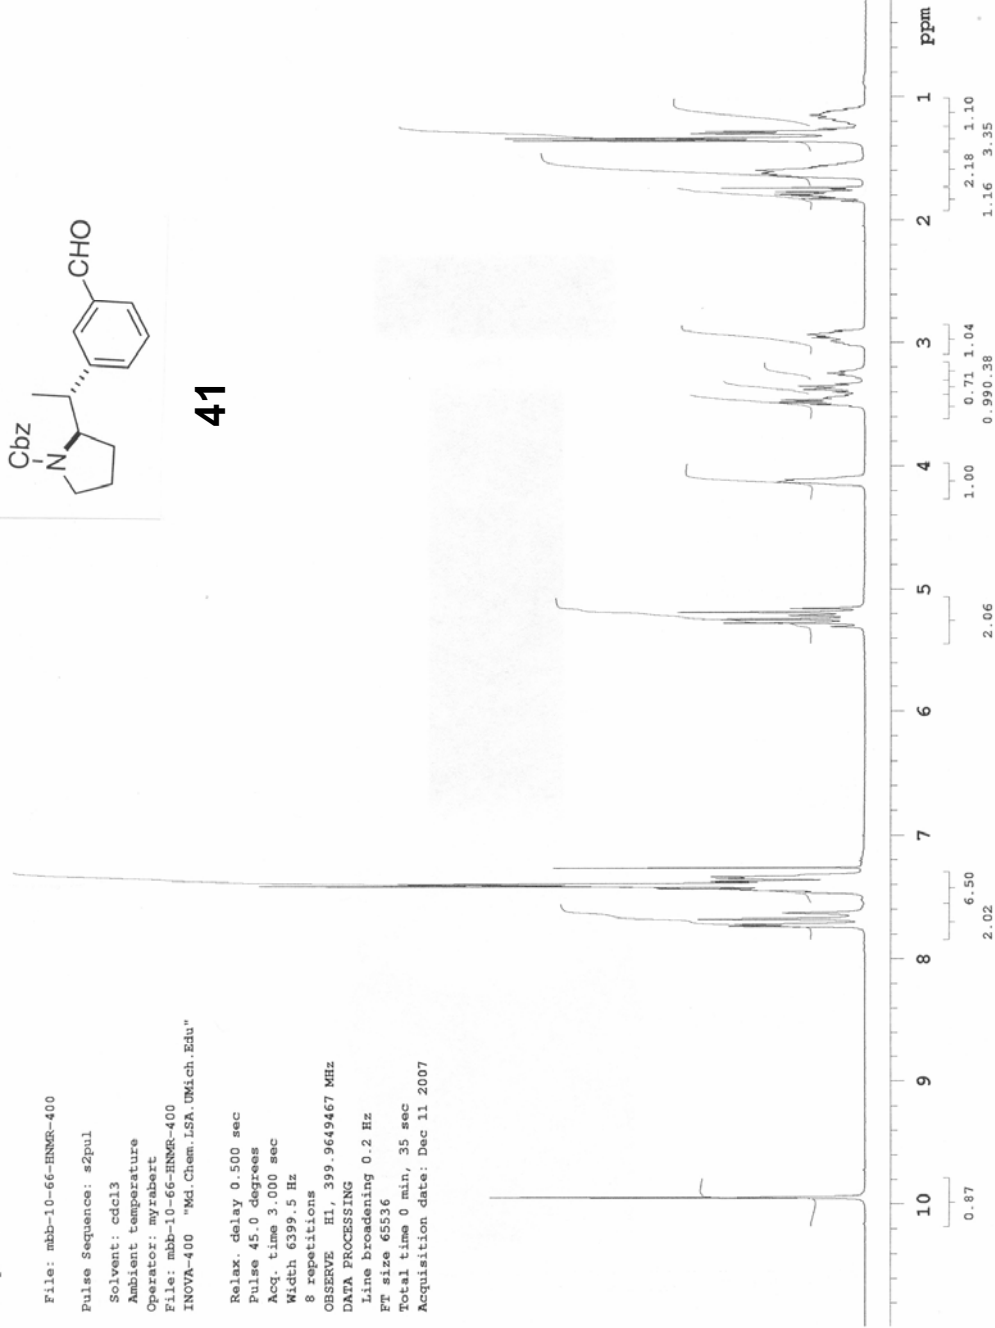

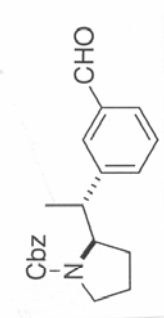

41

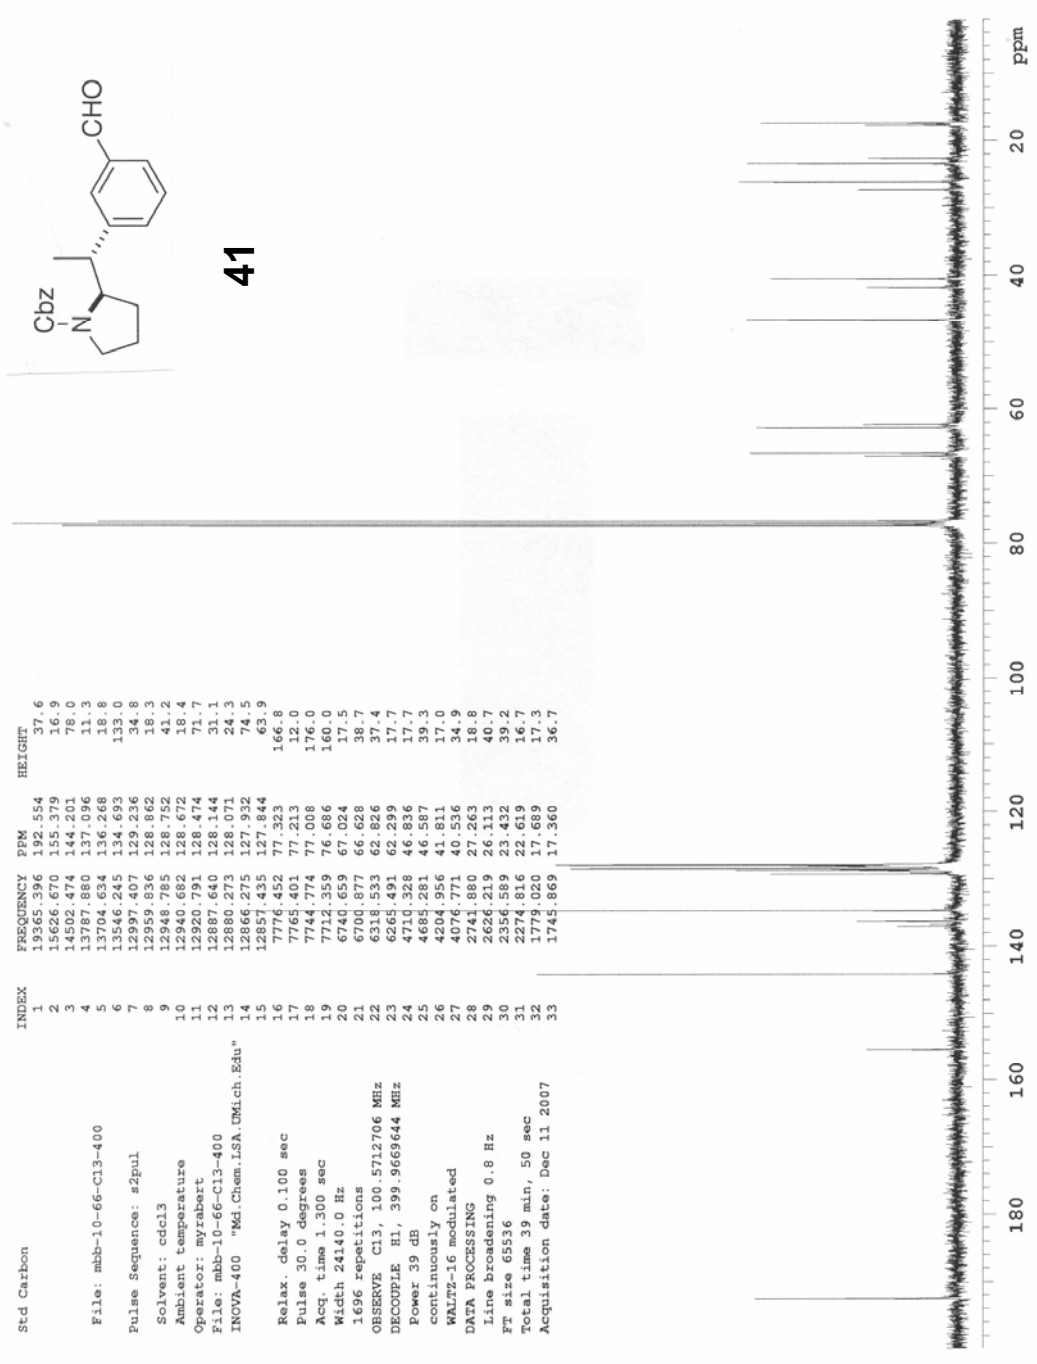

| INDEX | FREQUENCY PPM | HEIGHT  |
|-------|---------------|---------|
| 1     | 19365.396     | 192.554 |
| 2     | 15626.670     | 155.379 |
| 3     | 14502.474     | 144.201 |
| 4     | 13787.880     | 137.096 |
| 5     | 13704.634     | 136.268 |
| 6     | 13546.245     | 134.693 |
| 7     | 12997.407     | 129.236 |
| 8     | 12959.836     | 128.862 |
| 9     | 12948.785     | 128.752 |
| 10    | 12940.682     | 128.672 |
| 11    | 12920.791     | 128.474 |
| 12    | 12887.640     | 128.144 |
| 13    | 12880.273     | 128.071 |
| 14    | 12866.275     | 127.932 |
| 15    | 12857.435     | 127.844 |
| 16    | 7776.452      | 77.323  |
| 17    | 7765.401      | 77.213  |
| 18    | 7744.774      | 77.008  |
| 19    | 7712.359      | 76.686  |
| 20    | 6740.659      | 67.024  |
| 21    | 6700.877      | 66.628  |
| 22    | 6318.533      | 62.826  |
| 23    | 6265.491      | 62.299  |
| 24    | 4710.328      | 46.836  |
| 25    | 4685.281      | 46.587  |
| 26    | 4204.956      | 41.811  |
| 27    | 4076.771      | 40.536  |
| 28    | 2741.880      | 27.263  |
| 29    | 2626.219      | 26.113  |
| 30    | 2356.589      | 23.432  |
| 31    | 2274.816      | 22.619  |
| 32    | 1779.020      | 17.689  |
| 33    | 1745.869      | 17.360  |

Std Carbon

File: mbb-10-66-C13-400

Pulse Sequence: s2pul

Solvent: cdcl3

Ambient temperature

Operator: myrabort

File: mbb-10-66-C13-400

INOVA-400 "Md.Chem.LSA,UMich.Edu"

Relax. delay 0.100 sec

Pulse 30.0 degrees

Acq. time 1.300 sec

Width 24140.0 Hz

1696 repetitions

OBSERVE C13, 100.5712706 MHz

DECOUPLE H1, 399.9669644 MHz

Power 39 dB

continuously on

WALTZ-16 modulated

DATA PROCESSING

Line broadening 0.8 Hz

FT size 65536

Total time 39 min, 50 sec

Acquisition date: Dec 11 2007

Std proton

File: mbb-9-171-iso

Pulse Sequence: s2pu1

Solvent: cdc13

Ambient temperature

Operator: myrabert

File: mbb-9-171-iso

INOVA-400 "Kr.chem.1sa.umich.edu"

Relax. delay 0.500 sec

Pulse 45.0 degrees

Acq. time 3.000 sec

Width 6399.5 Hz

8 repetitions

OBSERVE H1, 399.9649466 MHz

DATA PROCESSING

Line broadening 0.2 Hz

FT size 65536

Total time 0 min, 35 sec

Acquisition date: Aug 21 2007

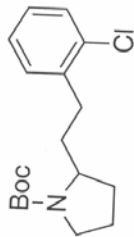

42

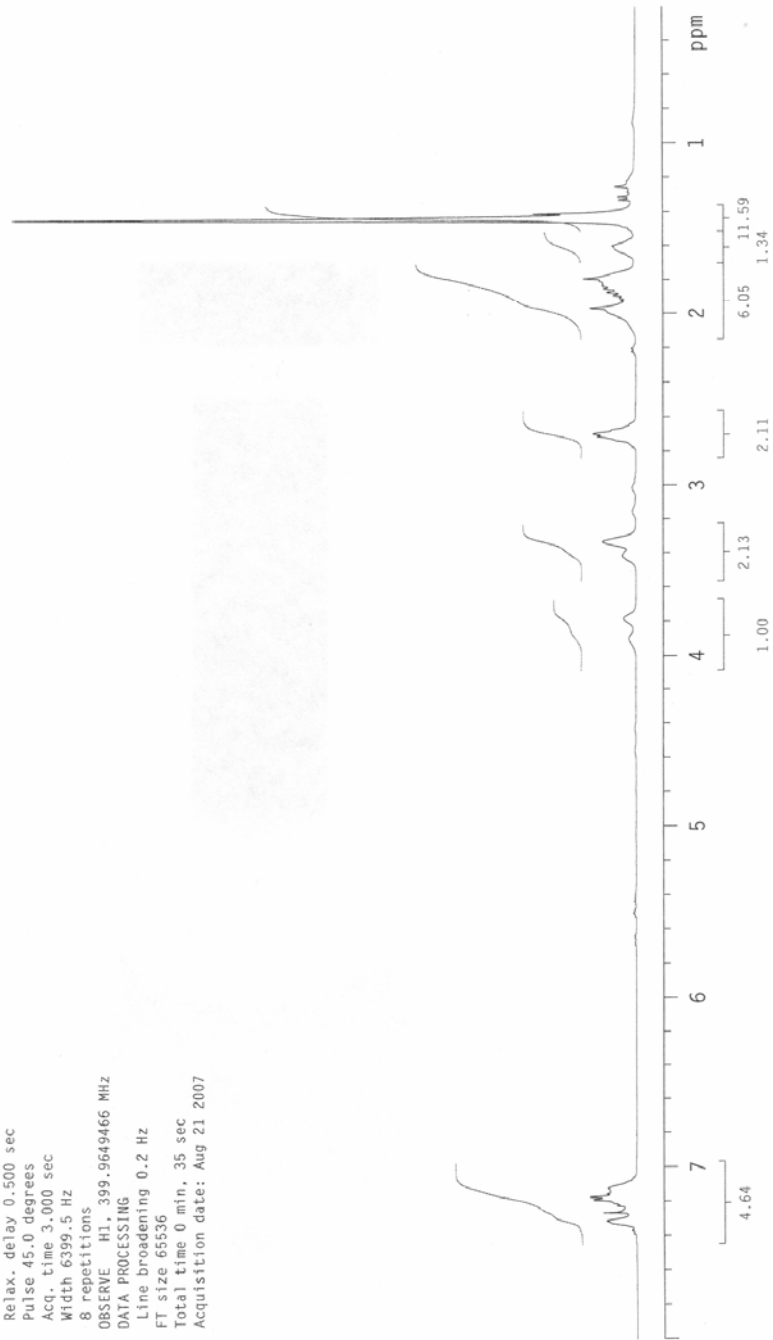



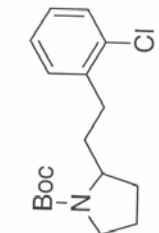

42

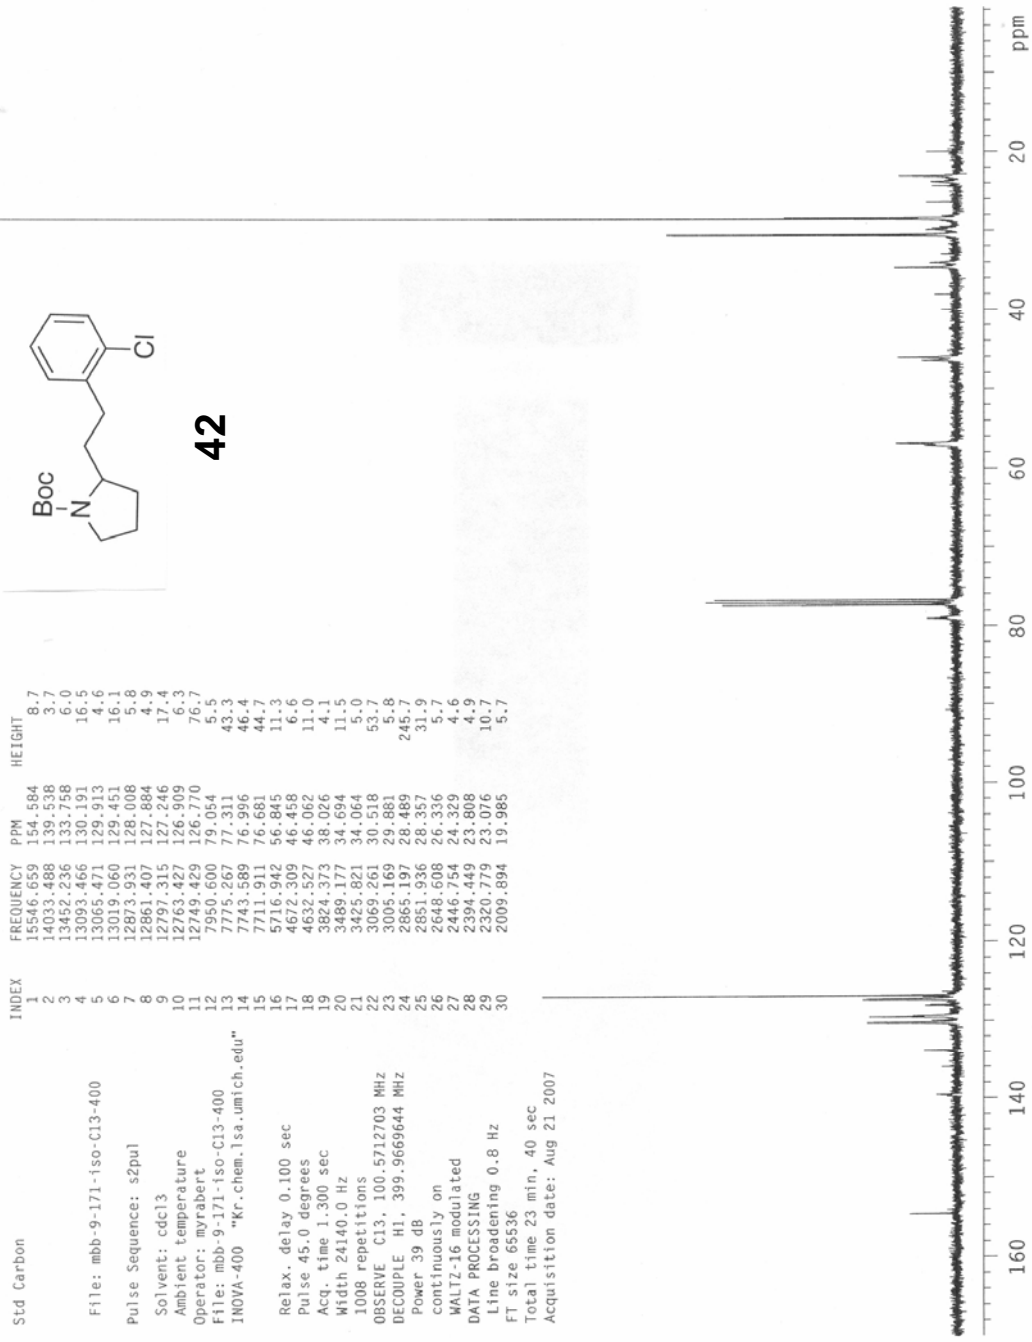

Std Carbon

File: mbb-9-171-iso-C13-400

Pulse Sequence: s2pul

Solvent: cdcl3

Ambient temperature

Operator: mvrabert

File: mbb-9-171-iso-C13-400

INOVA-400 "Kr.chem.lsa.umtch.edu"

Relax. delay 0.100 sec

Pulse 45.0 degrees

Acq. time 1.300 sec

Width 24140.0 Hz

1008 repetitions

OBSERVE C13, 100.5712703 MHZ

DECOUPLE H1, 399.9669644 MHZ

Power 39 dB

continuously on

WALTZ-16 modulated

DATA PROCESSING

Line broadening 0.8 Hz

FT size 65536

Total time 23 min, 40 sec

Acquisition date: Aug 21 2007

Standard Proton

File: mbb-9-66-HNMR-iso-500

Pulse Sequence: s2pul

Solvent: cdcl3

Ambient temperature

Operator: myrabort

File: mbb-9-66-HNMR-iso-500

NOVA-500 "Md.Chem.LSA.UMich.Edu"

Relax. delay 0.100 sec

Pulse 45.0 degrees

Acq. time 3.000 sec

Width 8003.2 Hz

8 repetitions

OBSERVE H1, 499.9042149 MHz

DATA PROCESSING

Line broadening 0.2 Hz

FT size 65536

Total time 0 min, 31 sec

Acquisition date: Jun 21 2007

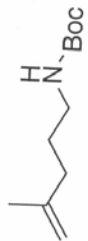

46

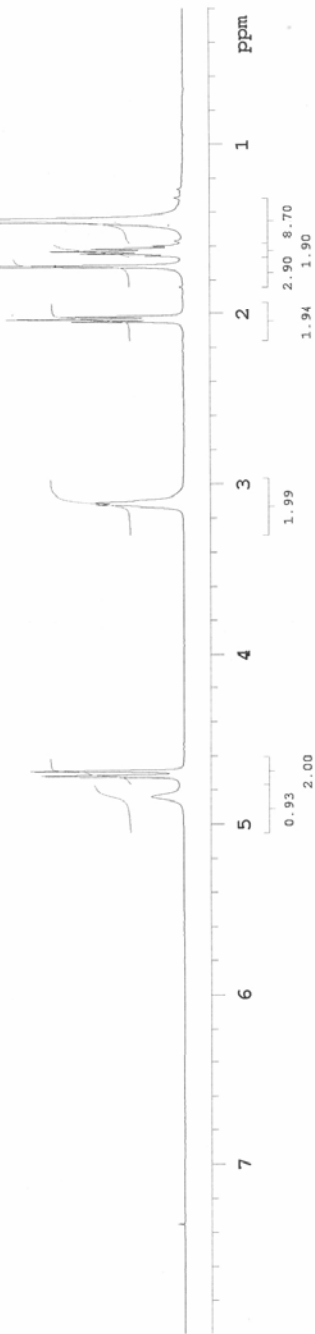

Standard Carbon

| INDEX | FREQUENCY PPM | HEIGHT  |
|-------|---------------|---------|
| 1     | 19586.757     | 155.820 |
| 2     | 18191.602     | 144.721 |
| 3     | 13842.272     | 110.121 |
| 4     | 9884.653      | 78.636  |
| 5     | 9712.042      | 77.263  |
| 6     | 9679.821      | 77.007  |
| 7     | 9648.061      | 76.754  |
| 8     | 5039.585      | 40.092  |
| 9     | 4370.775      | 34.771  |
| 10    | 3546.847      | 28.217  |
| 11    | 3490.231      | 27.766  |
| 12    | 2776.773      | 22.090  |

File: mbb-9-66-C13-500  
Pulse Sequence: szpul  
Solvent: cdcl3  
Ambient temperature  
Operator: myrabort  
File: mbb-9-66-C13-500  
INOVA-500 "Md.Chem.USA.UMich.Edu"

Relax. delay 0.100 sec  
Pulse 45.0 degrees  
Acq. time 1.300 sec  
Width 30165.9 Hz  
240 repetitions  
OBSERVE C13, 125.7010382 MHz  
DECOUPLE H1, 499.9067532 MHz  
Power 31 dB  
continuously on  
WALTZ-16 modulated  
DATA PROCESSING  
Line broadening 1.0 Hz  
FT size 131072  
Total time 5 min, 41 sec  
Acquisition date: Jun 21 2007

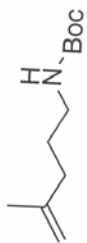

46

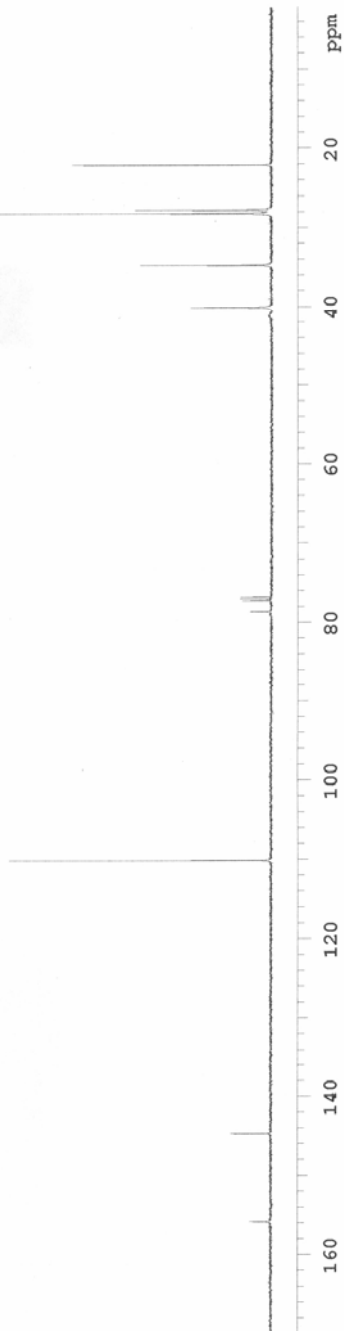

Standard Proton

File: mbb-9-71-iso-HNMR

Pulse Sequence: s2pul

Solvent: cdcl3

Ambient temperature

Operator: myrabort

File: mbb-9-71-iso-HNMR

INOVA-500 "Md.Chem.LSA,UMich.Edu"

Relax. delay 0.100 sec

Pulse 45.0 degrees

Acq. time 3.000 sec

Width 8003.2 Hz

16 repetitions

OBSERVE E1, 499.9042658 MHz

DATA PROCESSING

Line broadening 0.2 Hz

FT size 65536

Total time 0 min, 55 sec

Acquisition date: Jun 23 2007

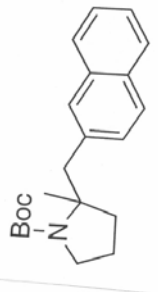

47

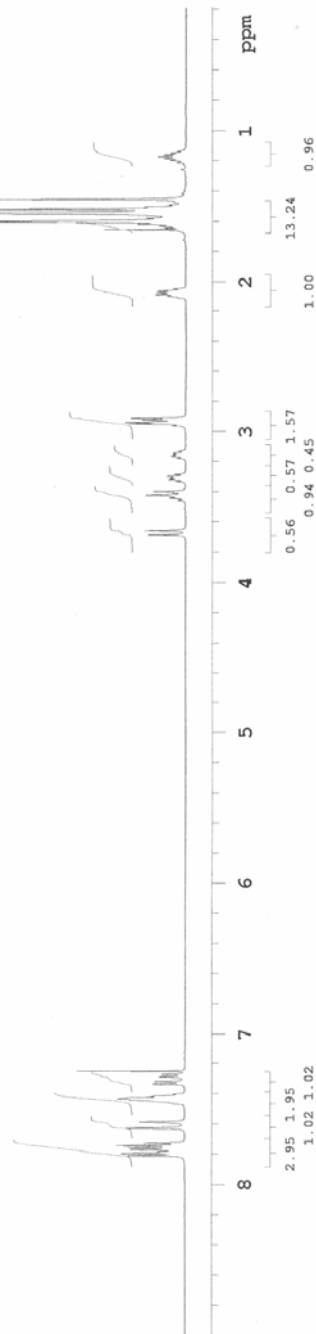

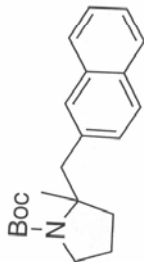

Standard Carbon

File: mbb-9-71-C13-500

Pulse Sequence: s2pul

Solvent: cdcl3

Ambient temperature

Operator: myrabort

File: mbb-9-71-C13-500

INOVA-500 "Md.Chem.LSA.UMich.Edu"

Relax. delay 0.100 sec

Pulse 45.0 degrees

Acq. time 1.300 sec

Width 30165.9 Hz

2656 repetitions

OBSERVE C13, 125.7010286 MHz

DECOUPLE H1, 499.9067532 MHz

Power 31 dB

continuously on

MALZ-16 modulated

DATA PROCESSING

Line broadening 1.0 Hz

FT size 131072

Total time 1 hr, 2 min, 26 sec

Acquisition date: Jun 23 2007

| INDEX | FREQUENCY PPM | HEIGHT  |
|-------|---------------|---------|
| 1     | 19408.538     | 154.402 |
| 2     | 19327.526     | 153.758 |
| 3     | 17169.662     | 136.591 |
| 4     | 17137.441     | 136.335 |
| 5     | 16765.523     | 133.376 |
| 6     | 16597.975     | 132.043 |
| 7     | 16238.945     | 129.187 |
| 8     | 16208.105     | 128.942 |
| 9     | 16187.852     | 128.781 |
| 10    | 16178.646     | 128.707 |
| 11    | 16033.193     | 127.550 |
| 12    | 16027.209     | 127.503 |
| 13    | 15987.624     | 127.188 |
| 14    | 15818.695     | 125.844 |
| 15    | 15796.601     | 125.668 |
| 16    | 15757.016     | 125.353 |
| 17    | 15734.001     | 125.170 |
| 18    | 10002.864     | 79.577  |
| 19    | 9878.124      | 78.584  |
| 20    | 9711.497      | 77.259  |
| 21    | 9679.737      | 77.006  |
| 22    | 9647.516      | 76.750  |
| 23    | 8000.119      | 63.644  |
| 24    | 7936.599      | 63.139  |
| 25    | 6096.338      | 48.499  |
| 26    | 6090.814      | 48.455  |
| 27    | 5590.013      | 44.471  |
| 28    | 5431.672      | 43.211  |
| 29    | 4908.316      | 39.048  |
| 30    | 4755.037      | 37.828  |
| 31    | 3614.886      | 28.758  |
| 32    | 3612.124      | 28.736  |
| 33    | 3409.594      | 27.125  |
| 34    | 3280.251      | 26.096  |
| 35    | 2730.198      | 21.720  |
| 36    | 2676.804      | 21.295  |

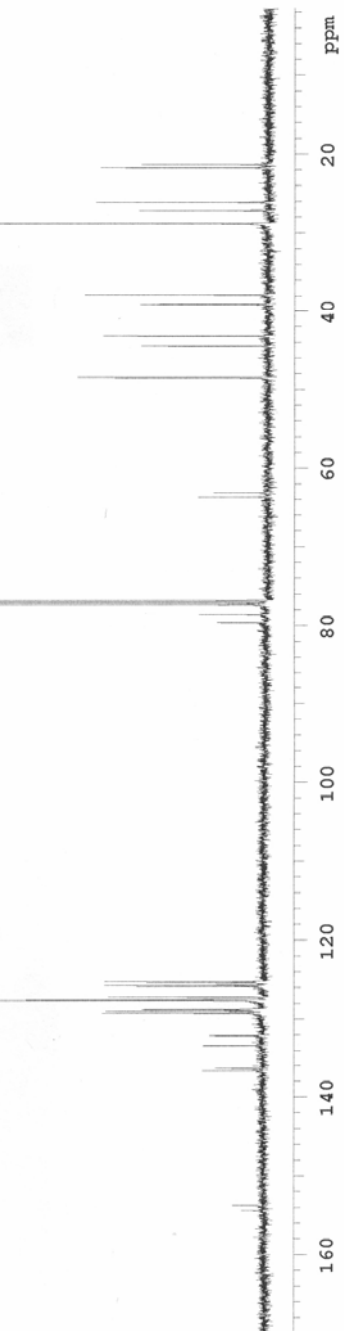



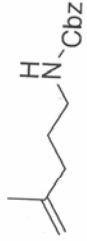

48

| INDEX | FREQUENCY PPM | HEIGHT  |
|-------|---------------|---------|
| 1     | 19649.976     | 156.323 |
| 2     | 18202.808     | 144.810 |
| 3     | 17169.905     | 136.593 |
| 4     | 16146.208     | 128.449 |
| 5     | 16097.417     | 128.061 |
| 6     | 16092.814     | 128.025 |
| 7     | 13879.254     | 110.415 |
| 8     | 9711.740      | 77.261  |
| 9     | 9679.980      | 77.008  |
| 10    | 9647.759      | 76.752  |
| 11    | 8361.694      | 66.520  |
| 12    | 5116.612      | 40.705  |
| 13    | 4376.918      | 34.820  |
| 14    | 3485.326      | 27.727  |
| 15    | 2795.803      | 22.242  |

Standard Carbon

File: mbb-9-81-C13-500

Pulse Sequence: s2pul

Solvent: cdcl3

Ambient temperature

Operator: myrbert

File: mbb-9-81-C13-500

INOVA-500 "Ml.Chem.LSA,UMich.Edu"

Relax. delay 0.100 sec

Pulse 45.0 degrees

Acq. time 1.300 sec

Width 30165.9 Hz

448 repetitions

OBSERVE C13, 125.7010339 MHz

DECOUPLE H1, 499.9067532 MHz

Power 31 dB

continuously on

WALTZ-16 modulated

DATA PROCESSING

Line broadening 1.0 Hz

Ft size 131072

Total time 10 min, 34 sec

Acquisition date: Jul 2 2007

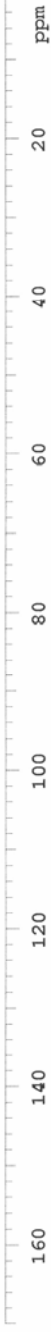

Std proton

File: mbb-10-110-HNMR-400

Pulse Sequence: s2pul

Solvent: cdcl3

Temp: 25.0 C / 298.1 K

Operator: myrabort

File: mbb-10-110-HNMR-400

INOVA-400 "Md.Chem.LSA.UM1ch.Edu"

Relax. delay 0.500 sec

Pulse 45.0 degrees

Acq. time 3.000 sec

Width 6399.5 Hz

8 repetitions

OBSERVE H1. 399.9649226 MHz

DATA PROCESSING

Line broadening 0.2 Hz

FT size 65536

Total time 0 min, 35 sec

Acquisition date: Apr 9 2008

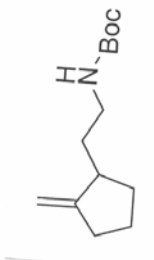

49

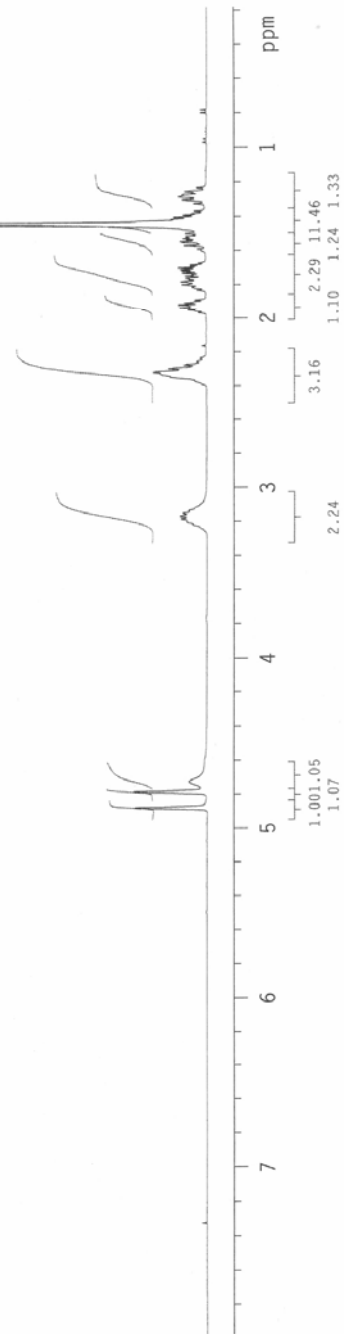



Std Carbon

File: mbb-10-110-C13-400

Pulse Sequence: s2pul

Solvent: cdc13

Temp: 25.0 C / 298.1 K

Operator: myrabort

File: mbb-10-110-C13-400

INOVA-400 "Kr-chem.lsa.umich.edu"

Relax. delay 0.100 sec

Pulse 30.0 degrees

Acq. time 1.300 sec

Width 24140.0 Hz

208 repetitions

OBSERVE C13, 100.5712751 MHz

DECOUPLE H1, 399.9669644 MHz

Power 39 dB

continuously on

WALTZ-16 modulated

DATA PROCESSING

Line broadening 0.8 Hz

FT size 65536

Total time 4 min, 53 sec

Acquisition date: Apr 9 2008

| INDEX | FREQUENCY PPM | HEIGHT |
|-------|---------------|--------|
| 1     | 15682.610     | 23.8   |
| 2     | 15670.087     | 5.7    |
| 3     | 10501.436     | 50.8   |
| 4     | 7919.322      | 5.5    |
| 5     | 7775.666      | 14.1   |
| 6     | 7743.988      | 13.8   |
| 7     | 7711.574      | 14.2   |
| 8     | 4159.968      | 17.5   |
| 9     | 3935.277      | 12.7   |
| 10    | 3471.159      | 16.6   |
| 11    | 3297.299      | 59.2   |
| 12    | 3265.621      | 61.6   |
| 13    | 2843.495      | 162.0  |
| 14    | 2417.685      | 46.3   |
| 15    | -17.827       | -0.177 |

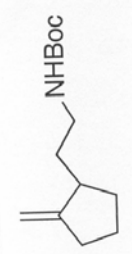

49

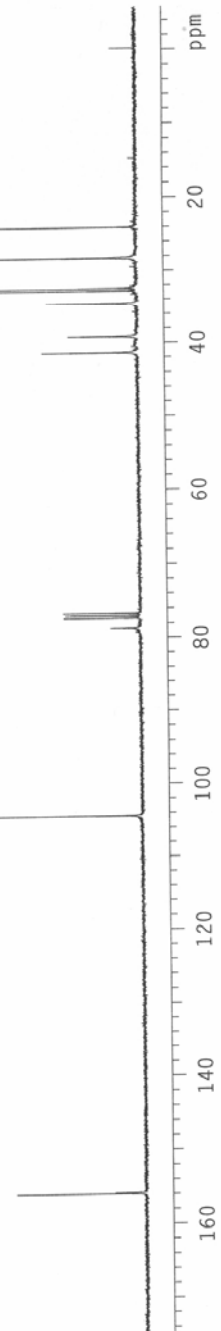

STANDARD PROTON PARAMETERS

File: mbb-10-138B-HNMR-400

Pulse Sequence: s2pul

Solvent: CDCl3

Temp: 25.0 C / 298.1 K

Operator: myrabort

File: mbb-10-138B-HNMR-400

VNMR-400 "Md.Chem.LSA.UMich.Edu"

Relax. del by 1.000 sec

Pulse 45.0 degrees

Acq. time 2.556 sec

Width 6410.3 Hz

8 repetitions

OBSERVE H1 399.5389259 MHz

DATA PROCESSING

FT size 32768

Total time 9 min, 35 sec

Acquisition date: May 7 2008

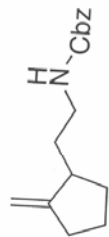

50

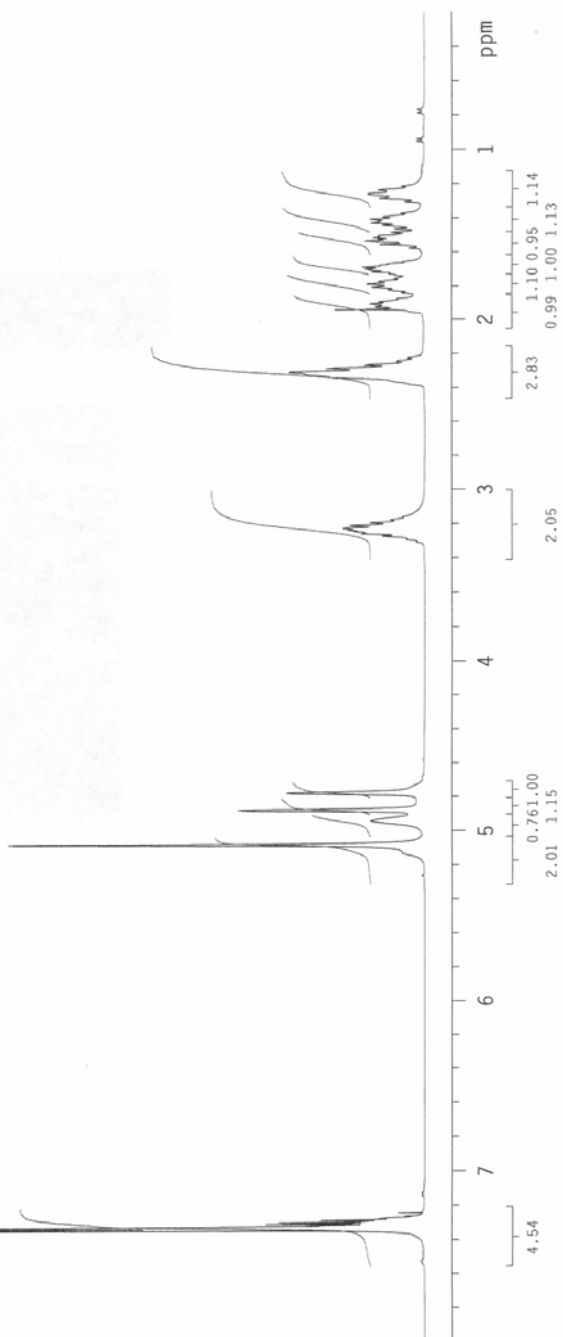



Std proton

File: JDN-II-186-1HNMR-pub

Pulse Sequence: sZpu1

Solvent: cdcl3

Ambient temperature

Operator: jneukom

File: JDN-II-186-1HNMR-pub

INOVA-400 "Kr.chem.lsa.umich.edu"

Relax. delay 0.500 sec

Pulse 45.0 degrees

Acq. time 3.000 sec

Width 6399.5 Hz

8 repetitions

OBSERVE H1, 399.9649342 MHz

DATA PROCESSING

Line broadening 0.2 Hz

FT size 65536

Total time 0 min, 35 sec

Acquisition date: May 12 2008

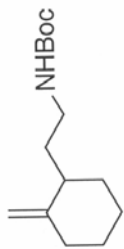

51

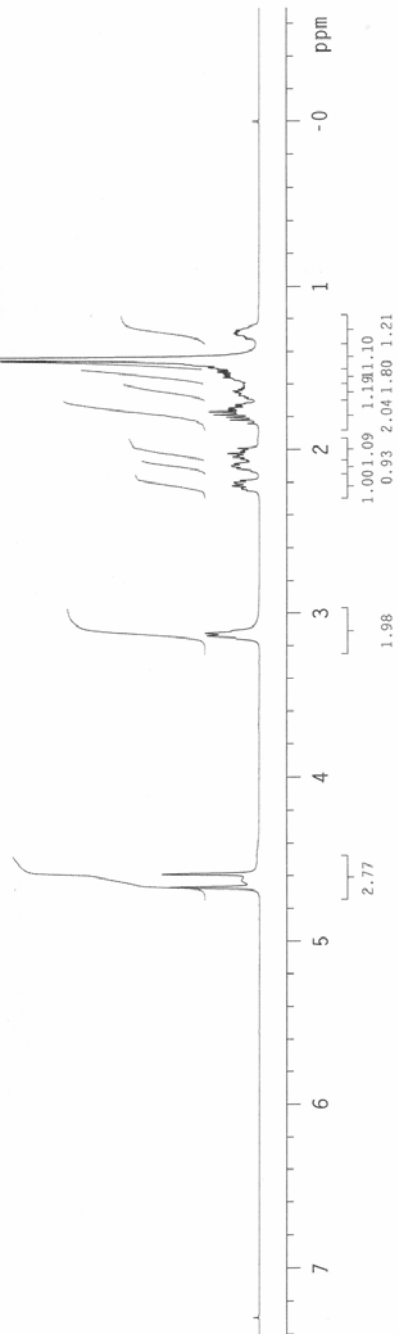

Std Carbon

File: JDN-II-186-13CMR

Pulse Sequence: s2pu1

Solvent: cdcl3

Ambient Temperature

Operator: jdneukom

File: JDN-II-186-13CMR

INOVA-400 "kr.chem.1sa.umich.edu"

Relax. delay 0.100 sec

Pulse 30.0 degrees

Acq. time 1.300 sec

Width 24140.0 Hz

512 repetitions

OBSERVE C13, 100.5712714 MHz

DECOUPLE H1, 399.9669644 MHz

Power 39 dB

continuously on

WALTZ-16 modulated

DATA PROCESSING

Line broadening 0.8 Hz

FT size 65536

Total time 12 min, 1 sec

Acquisition date: May 12 2008

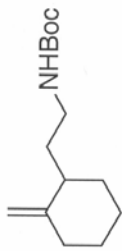

51

| INDEX | FREQUENCY PPM | HEIGHT  |
|-------|---------------|---------|
| 1     | 15675.243     | 155.862 |
| 2     | 15281.111     | 151.943 |
| 3     | 10662.036     | 106.015 |
| 4     | 7928.898      | 78.839  |
| 5     | 7776.402      | 77.322  |
| 6     | 7743.988      | 77.000  |
| 7     | 7712.310      | 76.685  |
| 8     | 4084.089      | 40.609  |
| 9     | 3910.229      | 38.880  |
| 10    | 3458.635      | 34.390  |
| 11    | 3387.175      | 33.679  |
| 12    | 3242.047      | 32.236  |
| 13    | 2875.173      | 28.588  |
| 14    | 2850.862      | 28.347  |
| 15    | 2405.161      | 23.915  |

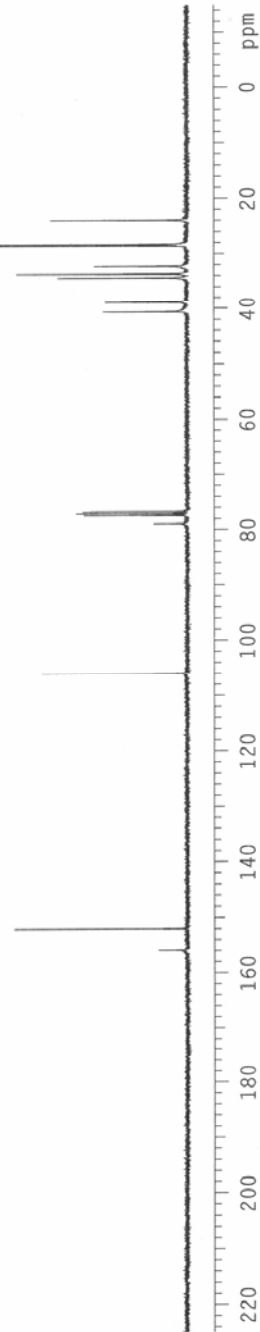

Standard Proton

File: mbb-9-94-iso

Pulse Sequence: s2pul

Solvent: cdcl3

Ambient temperature

Operator: myrabort

File: mbb-9-94-iso

INOVA-500 "Md.Chem.LSA.UMich.Edu"

Relax. delay 0.100 sec

Pulse 45.0 degrees

Acq. time 3.000 sec

Width 8003.2 Hz

8 repetitions

OBSERVE H1, 499.9042567 MHz

DATA PROCESSING

Line broadening 0.2 Hz

FT size 65536

Total time 0 min, 31 sec

Acquisition date: Jul 10 2007

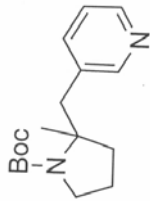

52

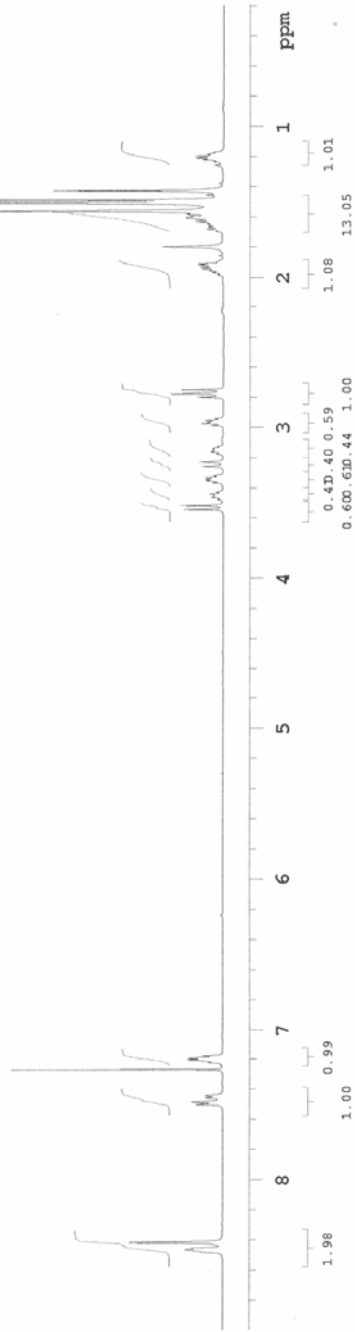

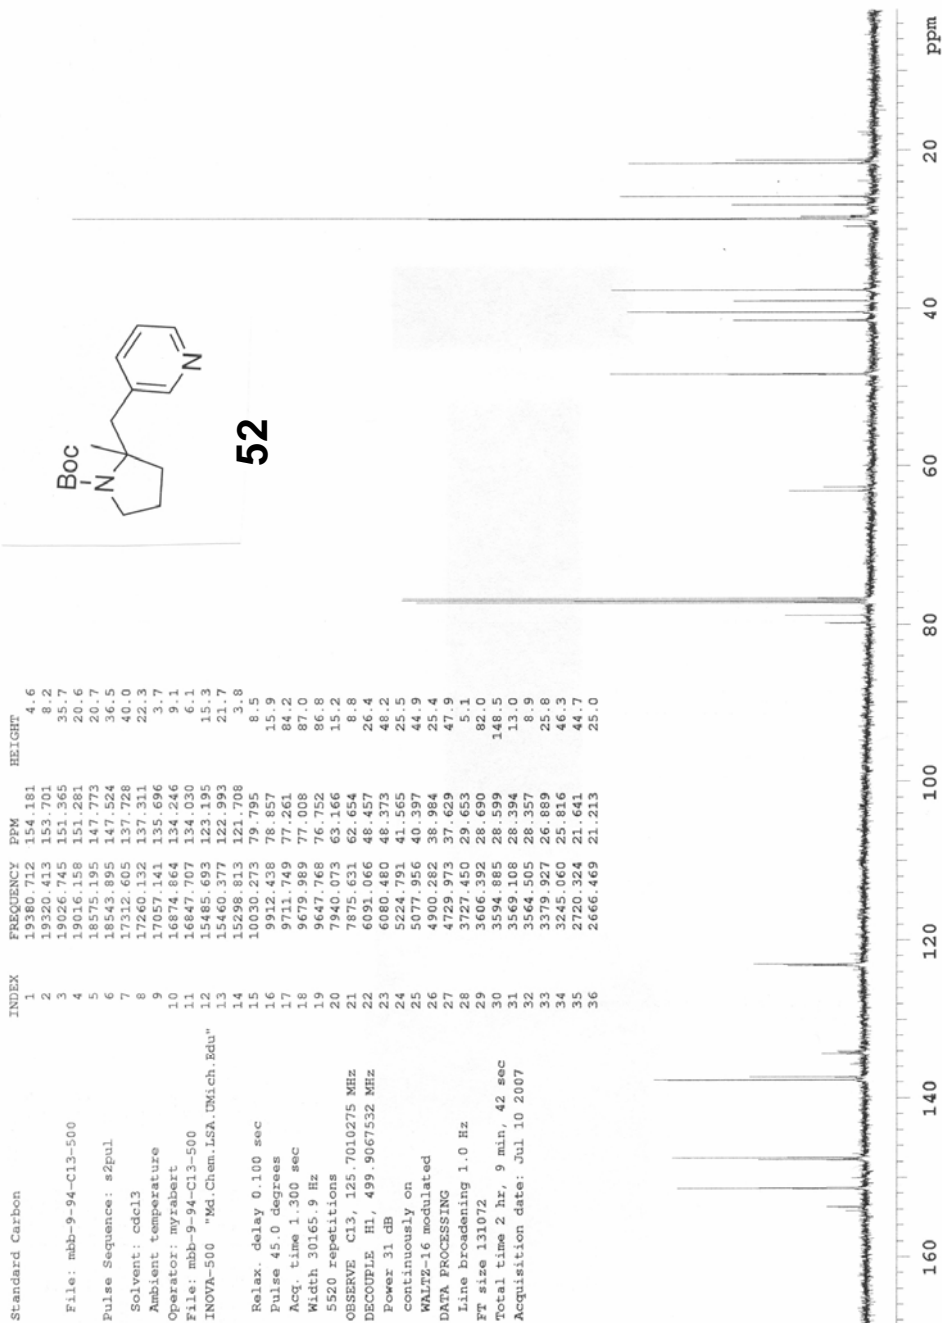

Standard Proton

File: mbb-9-153-HNMR-500

Pulse Sequence: s2pul

Solvent: cdcl3

Temp. 23.0 C / 296.1 K

Operator: myrabort

File: mbb-9-153-HNMR-500

INOVA-500 "Md.Chem.USA.Umich.Edu"

Relax. delay 0.100 sec

Pulse 45.0 degrees

Acq. time 3.000 sec

Width 8003.2 Hz

8 repetitions

OBSERVE H1, 499.9042604 MHz

DATA PROCESSING

Line broadening 0.2 Hz

FT size 65536

Total time 0 min, 31 sec

Acquisition date: Aug 10 2007

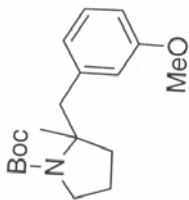

53

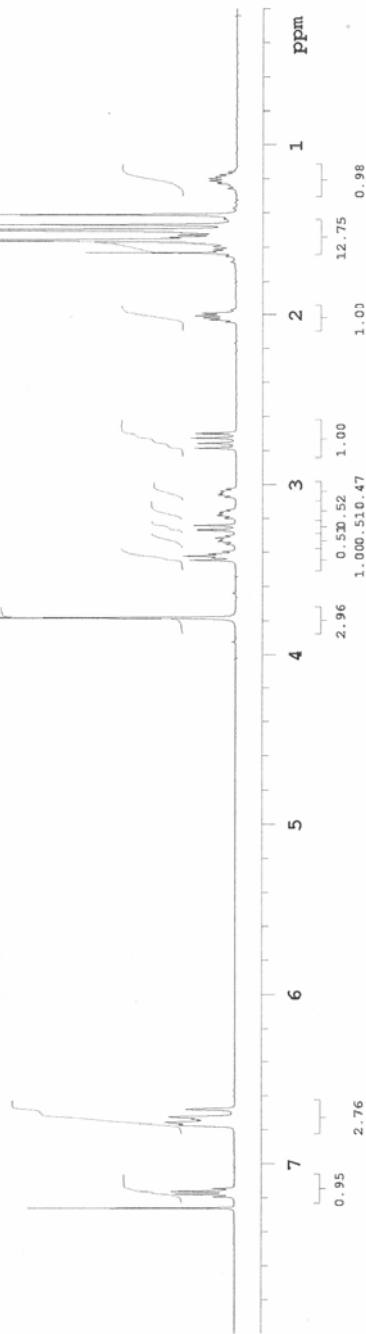



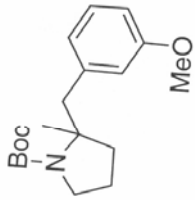

53

| INDEX | Standard Carbon | FREQUENCY PPM | HEIGHT  |
|-------|-----------------|---------------|---------|
| 1     |                 | 20033.691     | 159.376 |
| 2     |                 | 20021.724     | 159.281 |
| 3     |                 | 19399.404     | 154.330 |
| 4     |                 | 19316.091     | 153.667 |
| 5     |                 | 17668.694     | 140.561 |
| 6     |                 | 17632.791     | 140.276 |
| 7     |                 | 16214.161     | 128.990 |
| 8     |                 | 16179.178     | 128.712 |
| 9     |                 | 15465.260     | 123.032 |
| 10    |                 | 15428.897     | 122.743 |
| 11    |                 | 14595.302     | 116.111 |
| 12    |                 | 14547.432     | 115.730 |
| 13    |                 | 14051.233     | 111.783 |
| 14    |                 | 14018.552     | 111.523 |
| 15    |                 | 9991.429      | 79.486  |
| 16    |                 | 9876.815      | 78.574  |
| 17    |                 | 9711.569      | 77.259  |
| 18    |                 | 9679.809      | 77.007  |
| 19    |                 | 9648.049      | 76.754  |
| 20    |                 | 7979.938      | 63.483  |
| 21    |                 | 7913.656      | 62.956  |
| 22    |                 | 6934.147      | 55.164  |
| 23    |                 | 6103.775      | 48.558  |
| 24    |                 | 6093.188      | 48.474  |
| 25    |                 | 5572.134      | 44.328  |
| 26    |                 | 5425.299      | 43.160  |
| 27    |                 | 4911.150      | 39.070  |
| 28    |                 | 4756.951      | 37.843  |
| 29    |                 | 3610.815      | 28.725  |
| 30    |                 | 3606.673      | 28.692  |
| 31    |                 | 3422.094      | 27.224  |
| 32    |                 | 3272.038      | 26.030  |
| 33    |                 | 2727.048      | 21.695  |
| 34    |                 | 2671.353      | 21.252  |
| 35    |                 | 2340.400      | 18.619  |

Standard Carbon

File: mbb-9-153-C13-500

Pulse Sequence: s2pul

Solvent: cdcl3

Temp. 23.0 C / 296.1 K

Operator: myrabort

File: mbb-9-153-C13-500

INOVA-500 "Md.Chem.LSA.UNi.ch.Edu"

Relax. delay 0.100 sec

Pulse 45.0 degrees

Acq. time 1.300 sec

Width 30165.9 Hz

5712 repetitions

OBSERVE C13, 125.701263 MHz

DECOUPLE H1, 499.9067532 MHz

Power 31 dB

continuously on

WALTZ-16 modulated

DATA PROCESSING

Line broadening 1.0 Hz

FT size 131072

Total time 2 hr, 14 min, 13 sec

Acquisition date: Aug 10 2007

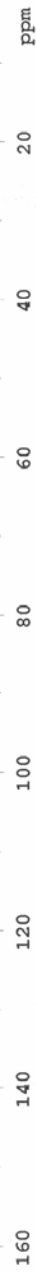

Standard Proton

File: mbb-9-95-INMR-500

Pulse Sequence: s2pul

Solvent: cdcl3

Ambient temperature

Operator: myrabert

File: mbb-9-95-INMR-500

INOVA-500 "Md.Chem.USA.UMich.Edu"

Relax. delay 0.100 sec

Pulse 45.0 degrees

Acq. time 3.000 sec

Width 8003.2 Hz

8 repetitions

OBSERVE H1, 499.9042671 MHz

DATA PROCESSING

Line broadening 0.2 Hz

FT size 65536

Total time 0 min, 31 sec

Acquisition date: Jul 10 2007

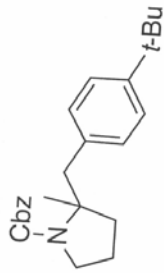

54

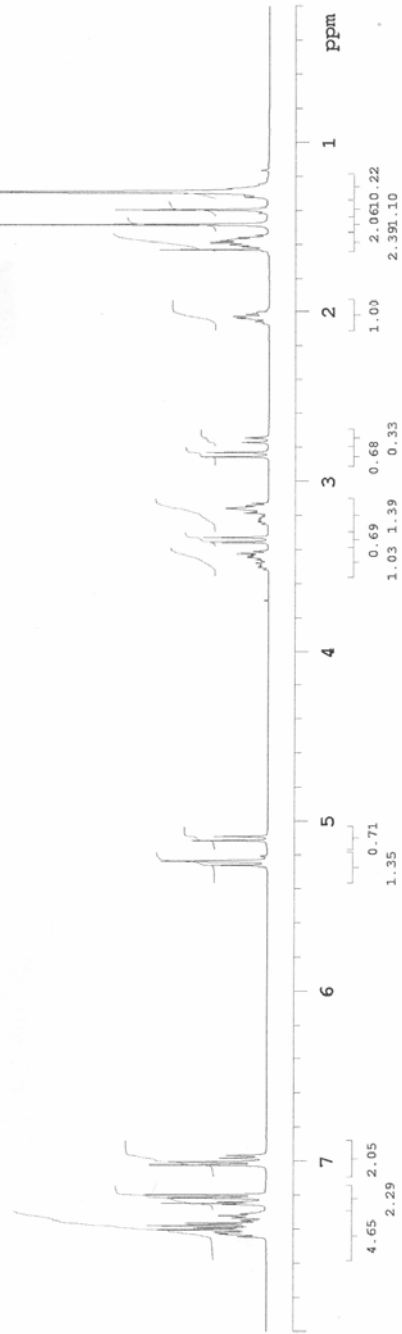

Standard Carbon

File: mbb-9-95-C13-500

Pulse Sequence: s2pul

Solvent: cdcl3

Ambient temperature

Operator: myrabort

File: mbb-9-95-C13-500

INOVA-500 "Md.Chem.LSA.UNi.ch.Edu"

Relax. delay 0.100 sec

Pulse 45.0 degrees

Acq. time 1.300 sec

Width 30165.9 Hz

2800 repetitions

OBSERVE C13, 125.7010280 MHz

DECOUPLE H1, 499.9067532 MHz

Power 31 dB

continuously on

WALTZ-16 modulated

DATA PROCESSING

Line broadening 1.0 Hz

FT size 131072

Total time 1 hr, 5 min, 49 sec

Acquisition date: Jul 10 2007

| INDEX | FREQUENCY PPM | HEIGHT  |
|-------|---------------|---------|
| 1     | 19481.470     | 154.983 |
| 2     | 19336.017     | 153.825 |
| 3     | 18742.696     | 149.105 |
| 4     | 18710.936     | 148.853 |
| 5     | 17284.021     | 137.501 |
| 6     | 17021.652     | 135.414 |
| 7     | 16990.813     | 135.168 |
| 8     | 16348.701     | 130.060 |
| 9     | 16330.749     | 129.917 |
| 10    | 16152.615     | 128.500 |
| 11    | 16140.647     | 128.405 |
| 12    | 16120.854     | 128.248 |
| 13    | 16084.031     | 127.955 |
| 14    | 16058.715     | 127.753 |
| 15    | 16055.493     | 127.728 |
| 16    | 15709.611     | 124.978 |
| 17    | 15687.256     | 124.798 |
| 18    | 9712.163      | 77.264  |
| 19    | 9679.942      | 77.008  |
| 20    | 9648.182      | 76.755  |
| 21    | 8421.495      | 66.996  |
| 22    | 8289.851      | 65.949  |
| 23    | 8064.306      | 64.155  |
| 24    | 7988.357      | 63.550  |
| 25    | 6175.714      | 49.130  |
| 26    | 6051.435      | 48.141  |
| 27    | 5513.349      | 43.861  |
| 28    | 5343.040      | 42.506  |
| 29    | 4888.729      | 38.892  |
| 30    | 4723.943      | 37.581  |
| 31    | 4312.899      | 34.311  |
| 32    | 3945.123      | 31.385  |
| 33    | 3941.901      | 31.359  |
| 34    | 3384.484      | 26.925  |
| 35    | 3227.523      | 25.676  |
| 36    | 2745.594      | 21.842  |
| 37    | 2692.199      | 21.417  |

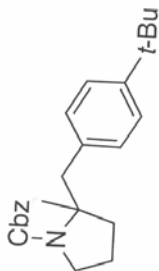

54

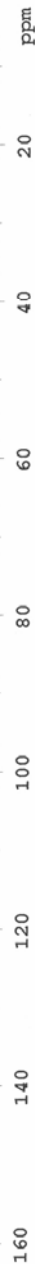

Standard Proton

File: mbb-9-99-iso-500

Pulse Sequence: s2pul

Solvent: cdcl3

Ambient temperature

Operator: myrabort

File: mbb-9-99-iso-500

INOVA-500 "Md.Chem.USA.UMich.Edu"

Relax. delay 0.100 sec

Pulse 45.0 degrees

Acq. time 3.000 sec

Width 8003.2 Hz

8 repetitions

OBSERVE H1, 499.9042608 MHz

DATA PROCESSING

Line broadening 0.2 Hz

FT size 65536

Total time 0 min, 31 sec

Acquisition date: Jul 12 2007

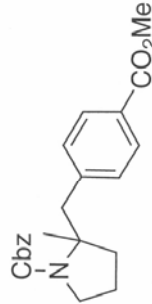

55

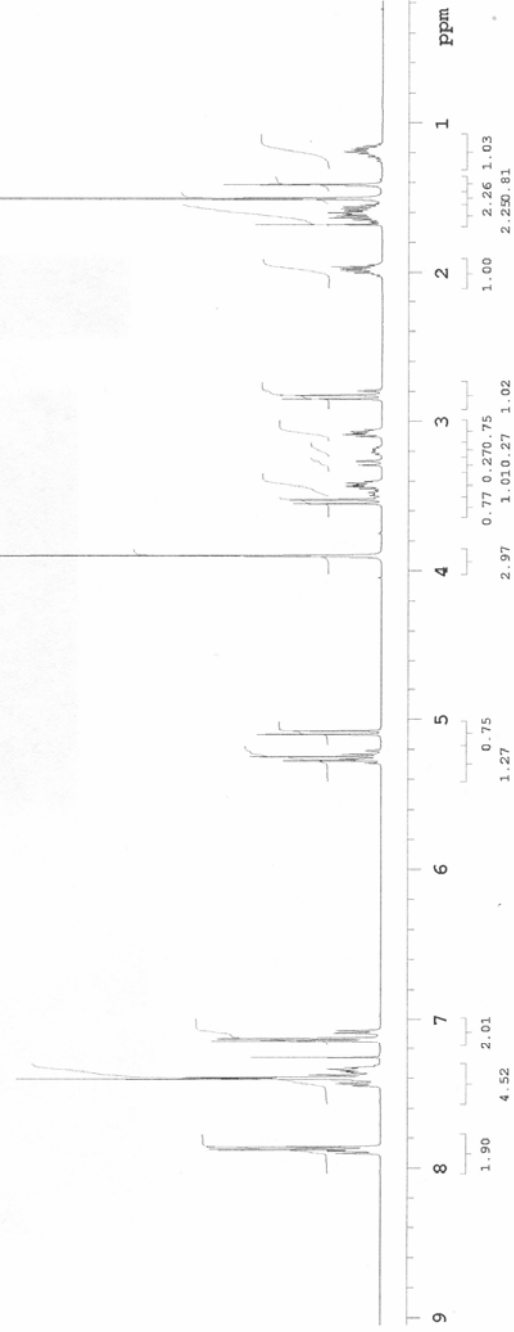

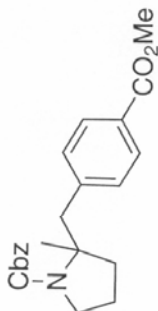

| INDEX | FREQUENCY PPM | HEIGHT  |
|-------|---------------|---------|
| 1     | 21010.769     | 167.149 |
| 2     | 19340.617     | 153.864 |
| 3     | 16115.971     | 144.150 |
| 4     | 16074.545     | 143.790 |
| 5     | 17256.441     | 137.296 |
| 6     | 16390.785     | 130.395 |
| 7     | 16370.532     | 130.234 |
| 8     | 16259.601     | 129.351 |
| 9     | 16245.331     | 129.238 |
| 10    | 16158.796     | 128.549 |
| 11    | 16146.368     | 128.451 |
| 12    | 16139.924     | 128.399 |
| 13    | 16124.274     | 128.275 |
| 14    | 16104.021     | 128.114 |
| 15    | 16099.418     | 128.077 |
| 16    | 16071.800     | 127.857 |
| 17    | 16062.134     | 127.780 |
| 18    | 9711.900      | 77.262  |
| 19    | 9679.679      | 77.006  |
| 20    | 9647.919      | 76.753  |
| 21    | 8434.581      | 67.100  |
| 22    | 8307.539      | 66.090  |
| 23    | 8047.012      | 64.017  |
| 24    | 7967.381      | 63.384  |
| 25    | 6533.561      | 51.977  |
| 26    | 6169.928      | 49.084  |
| 27    | 6046.569      | 48.103  |
| 28    | 5584.892      | 44.430  |
| 29    | 5408.599      | 43.027  |
| 30    | 4898.592      | 38.970  |
| 31    | 4722.299      | 37.568  |
| 32    | 3413.219      | 27.153  |
| 33    | 3267.306      | 25.993  |
| 34    | 2741.198      | 21.807  |
| 35    | 2686.714      | 21.390  |
| 36    | 2379.856      | 18.933  |

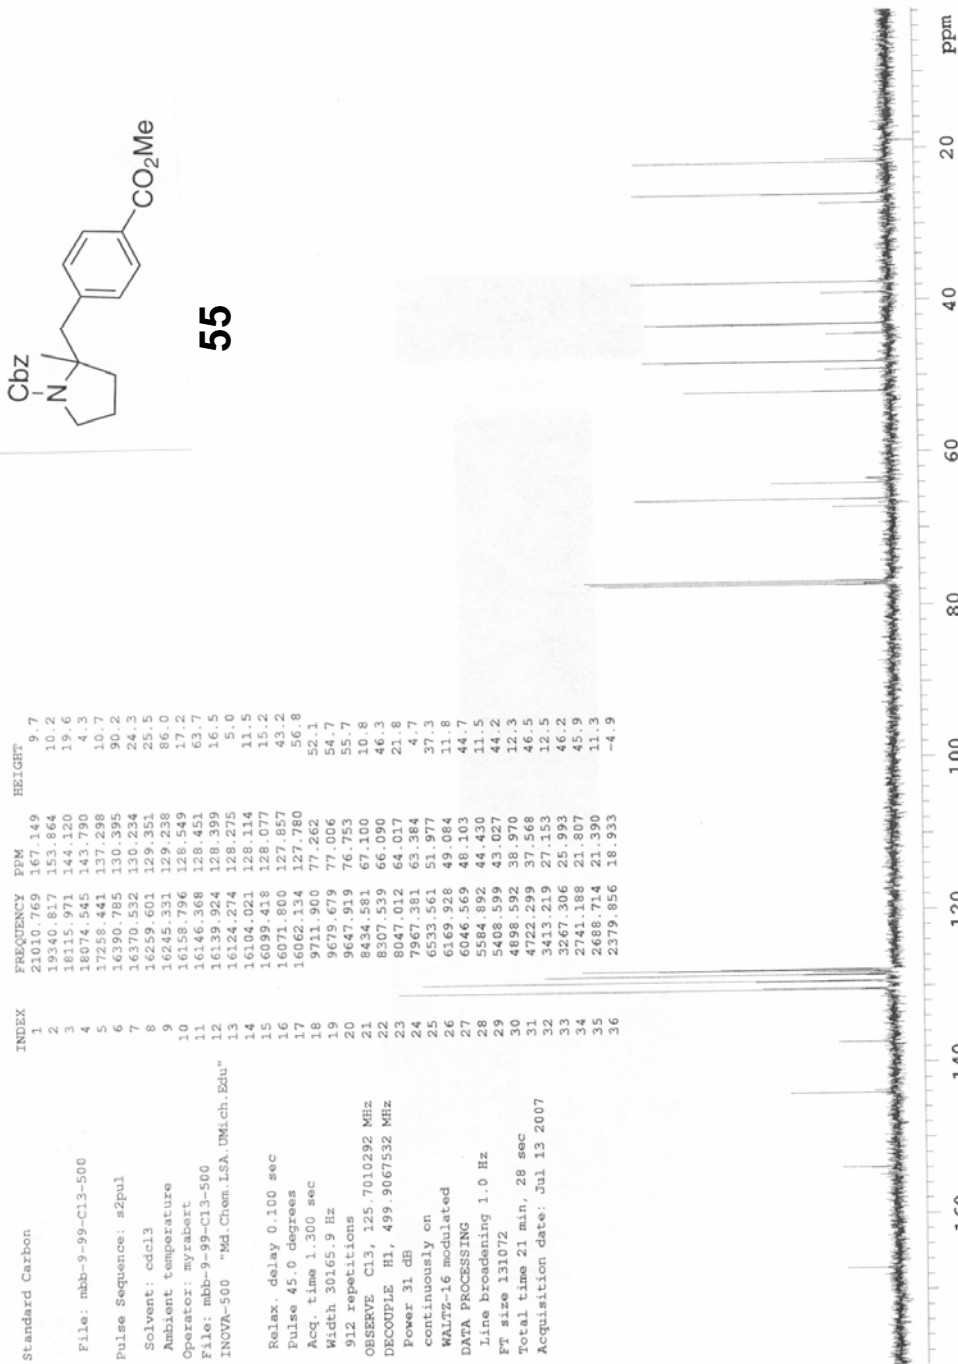

Std proton

File: mbb-10-114-HNMR-400

Pulse Sequence: s2pul

Solvent: cdc13

Ambient temperature

Operator: myrabert

File: mbb-10-114-HNMR-400

INOVA-400 "Kr.chem. | sa.umich.edu"

Relax. delay 0.500 sec

Pulse 45.0 degrees

Acq. time 3.000 sec

Width 6399.5 Hz

8 repetitions

OBSERVE H1, 399.9649530 MHz

DATA PROCESSING

Line broadening 0.2 Hz

FT size 65536

Total time 0 min, 35 sec

Acquisition date: Apr 11 2008

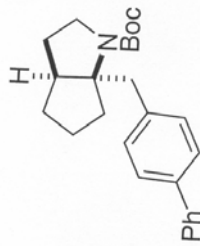

56

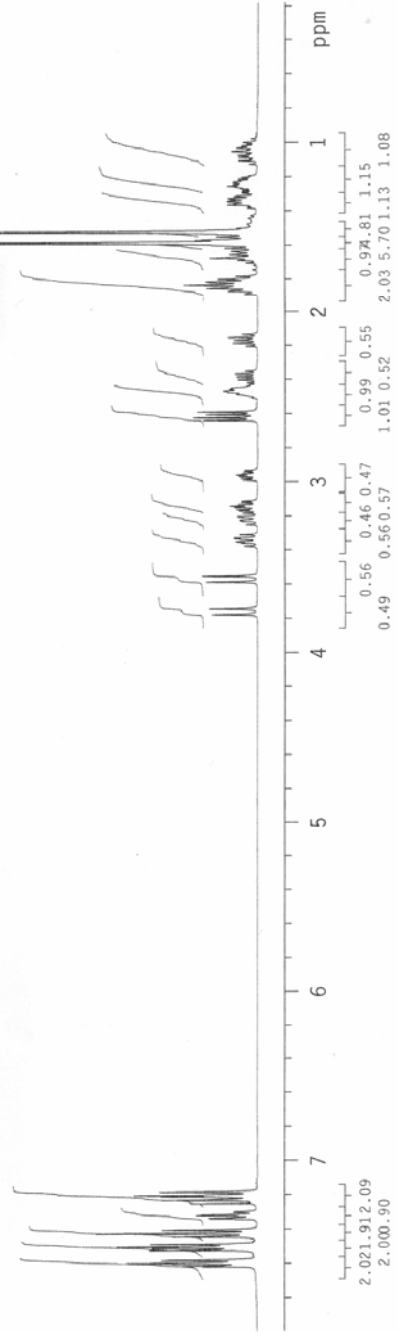

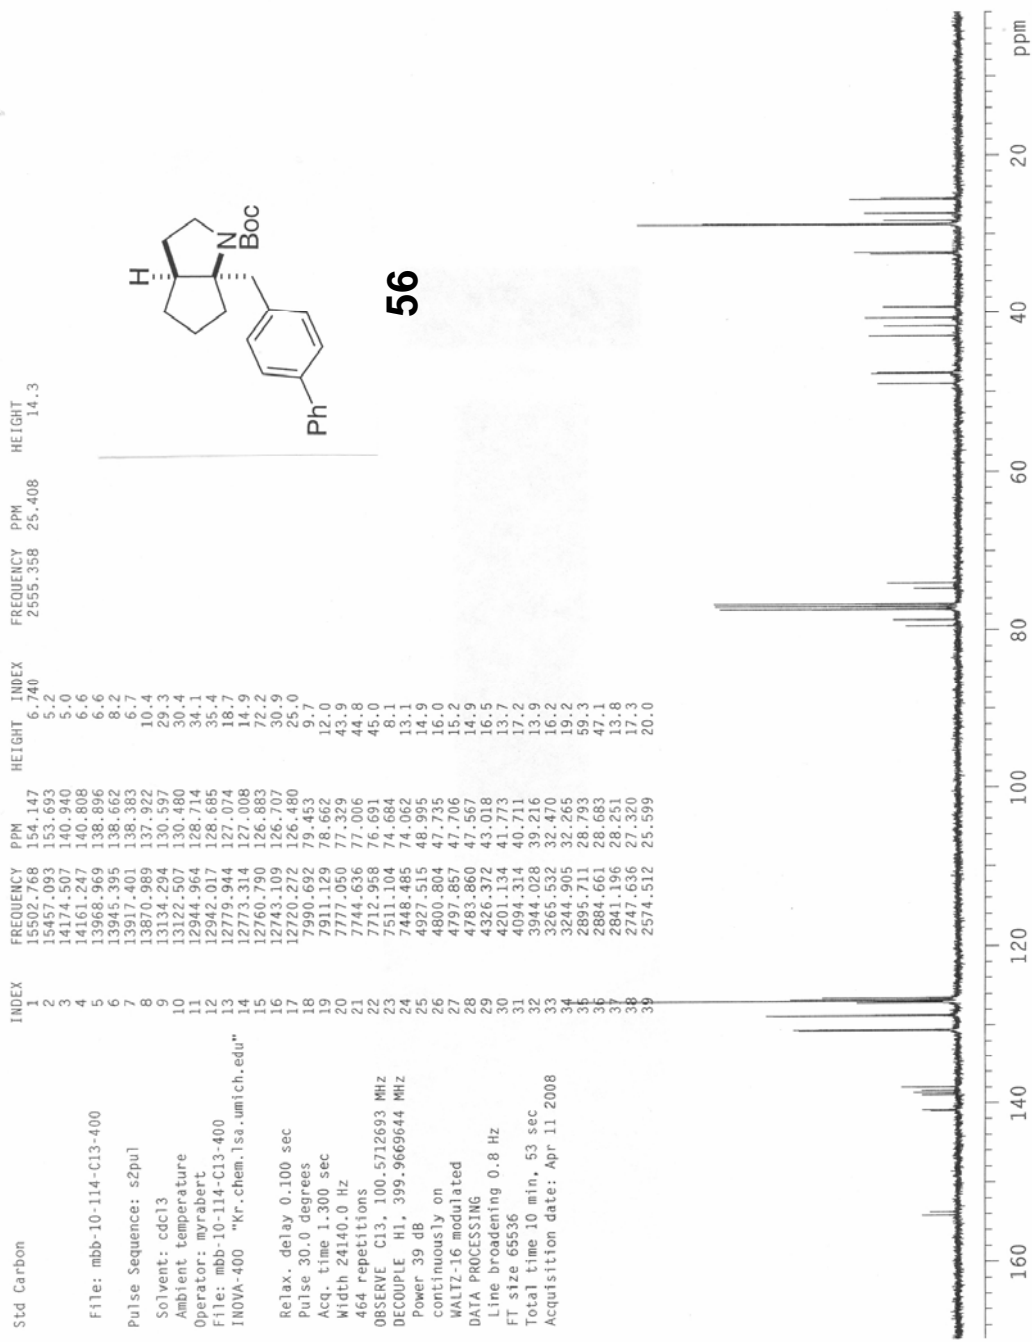

Std proton

File: mbb-10-121-HNMR-400

Pulse Sequence: s2pul

Solvent: cdcl3

Temp: 23.0 C / 296.1 K

Operator: myrabort

File: mbb-10-121-HNMR-400

INOVA-400 "Kr.chem.lsa.umich.edu"

Relax. delay 0.500 sec

Pulse 45.0 degrees

Acq. time 3.000 sec

Width 6399.5 Hz

8 repetitions

OBSERVE H1, 399.9649468 MHz

DATA PROCESSING

Line broadening 0.2 Hz

FT size 65536

Total time 0 min, 35 sec

Acquisition date: Apr 16 2008

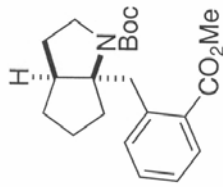

57

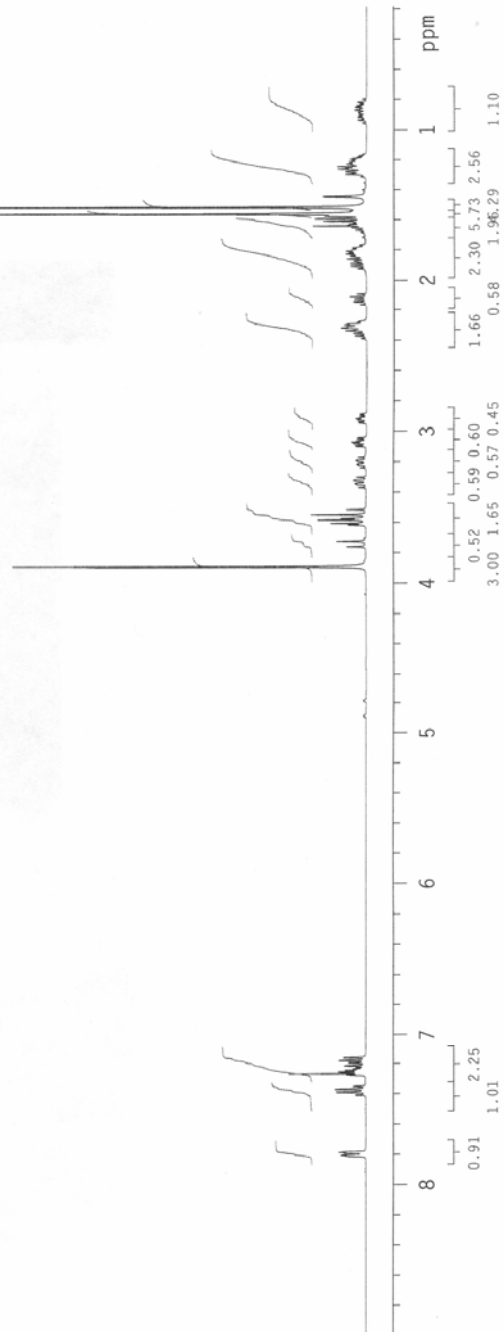



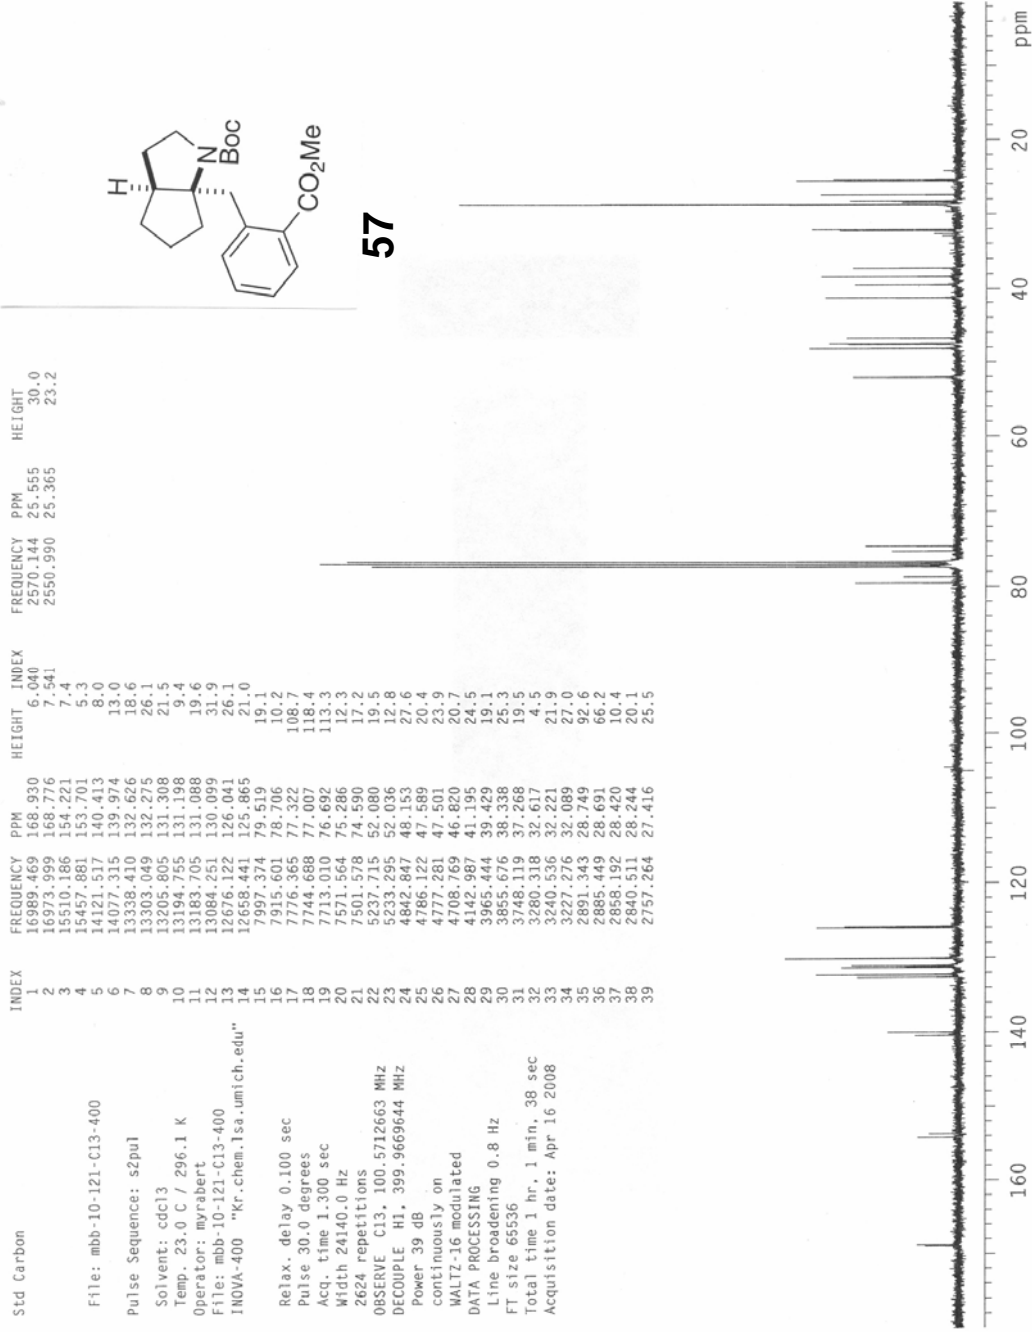

Std proton

File: JDN-II-207-1HMNR

Pulse Sequence: s2pul

Solvent: cdcl3

Ambient temperature

Operator: jdneukom

File: JDN-II-207-1HMNR

INOVA-400 "Kr.chem.1sa.amich.edu"

Relax. delay 0.500 sec

Pulse 45.0 degrees

Acq. time 3.000 sec

Width 6399.5 Hz

8 repetitions

OBSERVE H1, 399.9649885 MHz

DATA PROCESSING

Line broadening 0.2 Hz

FT size 65536

Total time 0 min, 35 sec

Acquisition date: May 26 2008

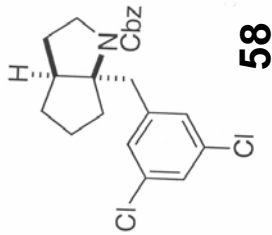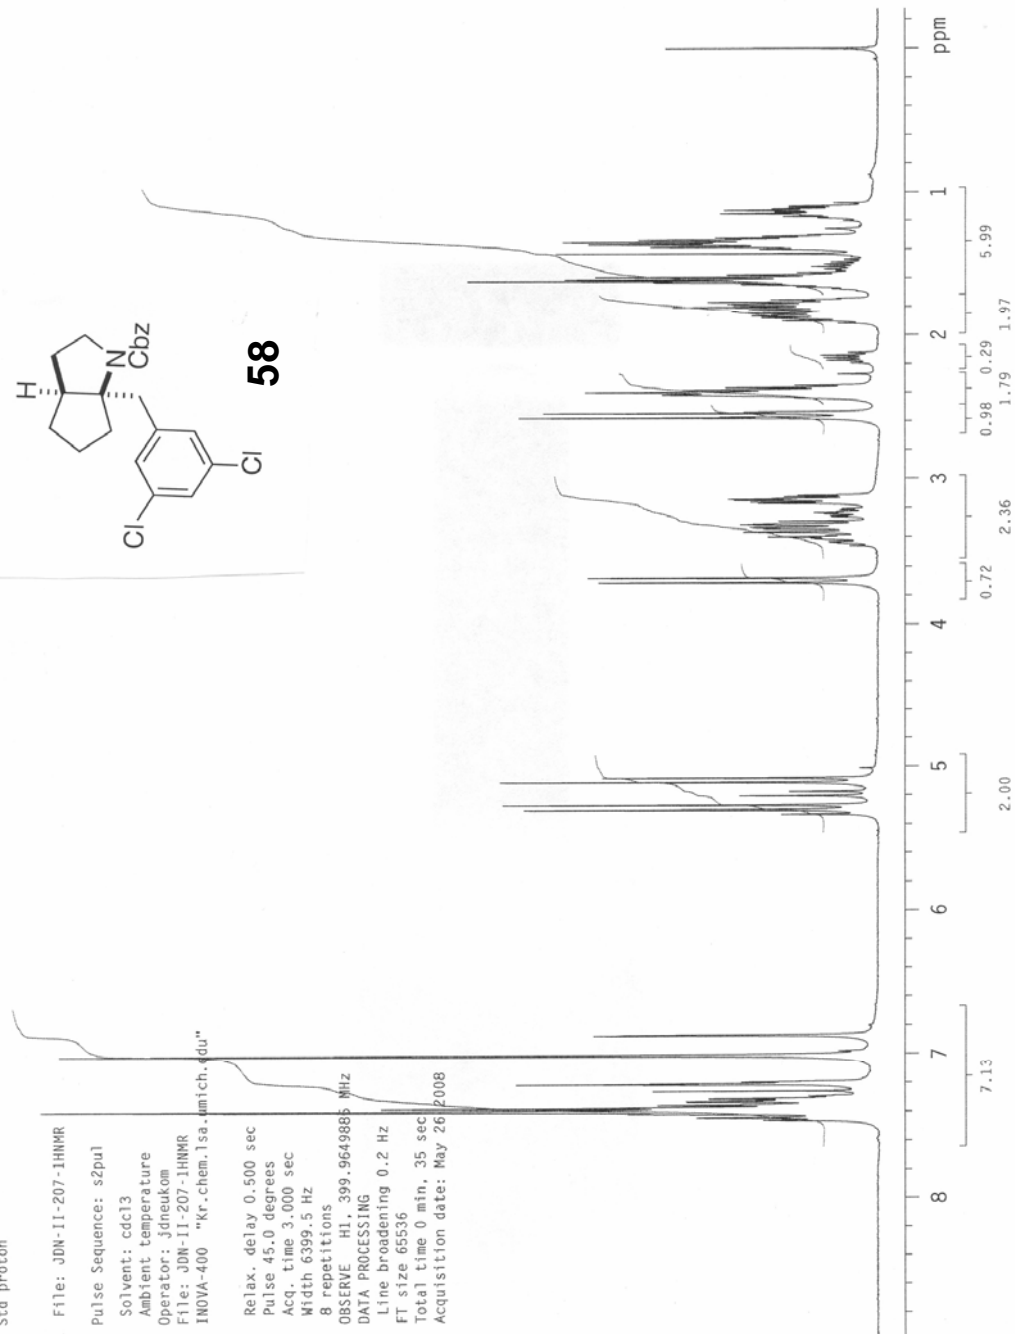

Std Carbon

File: JDN-II-207-13CNMR

Pulse Sequence: sZpul

Solvent: cdc13

Ambient temperature

Operator: jdneukom

File: JDN-II-207-13CNMR

INOVA-400 "Kr-chem.1sa.umich.edu"

Relax. delay 0.100 sec

Pulse 30.0 degrees

Acq. time 1.300 sec

Width 24140.0 Hz

256 repetitions

OBSERVE C13, 100.5712788 MHz

DECOUPLE H1, 399.9669644 MHz

Power 39 dB

continuously on

WALTZ-16 modulated

DATA PROCESSING

Line broadening 0.8 Hz

FT size 65536

Total time 6 min, 0 sec

Acquisition date: May 26 2008

| INDEX | FREQUENCY PPM | HEIGHT  |
|-------|---------------|---------|
| 1     | 15484.440     | 153.965 |
| 2     | 14310.885     | 142.296 |
| 3     | 14264.473     | 141.834 |
| 4     | 13789.305     | 137.110 |
| 5     | 13515.255     | 134.385 |
| 6     | 12936.949     | 128.635 |
| 7     | 12925.162     | 128.517 |
| 8     | 12920.742     | 128.473 |
| 9     | 12912.639     | 128.393 |
| 10    | 12914.112     | 128.408 |
| 11    | 12892.011     | 128.188 |
| 12    | 12856.650     | 127.836 |
| 13    | 12840.442     | 127.675 |
| 14    | 12729.202     | 126.569 |
| 15    | 12712.258     | 126.400 |
| 16    | 7775.666      | 77.315  |
| 17    | 7743.988      | 77.000  |
| 18    | 7711.574      | 76.678  |
| 19    | 7539.924      | 74.971  |
| 20    | 7450.047      | 74.077  |
| 21    | 6753.871      | 67.155  |
| 22    | 6676.518      | 66.386  |
| 23    | 4932.761      | 49.047  |
| 24    | 4845.095      | 48.176  |
| 25    | 4779.529      | 47.524  |
| 26    | 4774.372      | 47.473  |
| 27    | 4316.885      | 42.924  |
| 28    | 4164.389      | 41.407  |
| 29    | 4063.462      | 40.404  |
| 30    | 3938.224      | 39.159  |
| 31    | 3261.938      | 32.434  |
| 32    | 3231.733      | 32.134  |
| 33    | 2870.016      | 28.537  |
| 34    | 2780.876      | 27.651  |
| 35    | 2560.605      | 25.461  |
| 36    | 2541.450      | 25.270  |

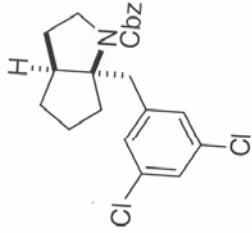

58

ppm

20

40

60

80

100

120

140

160

Standard Proton

File: JDN-II-195-1HNMR-2

Pulse Sequence: s2pul

Solvent: cdcl3

Ambient temperature

Operator: jduekum

File: JDN-II-195-1HNMR-2

INOVA-500 "Md.Chem.LSA.UMich.Edu"

Relax. delay 0.100 sec

Pulse 45.0 degrees

Acq. time 3.000 sec

Width 8003.2 Hz

8 repetitions

OBSERVE H1, 499.9042587 MHZ

DATA PROCESSING

Line broadening 0.2 Hz

FT size 65536

Total time 0 min, 31 sec

Acquisition date: Jun 11 2008

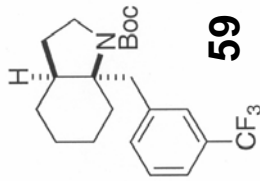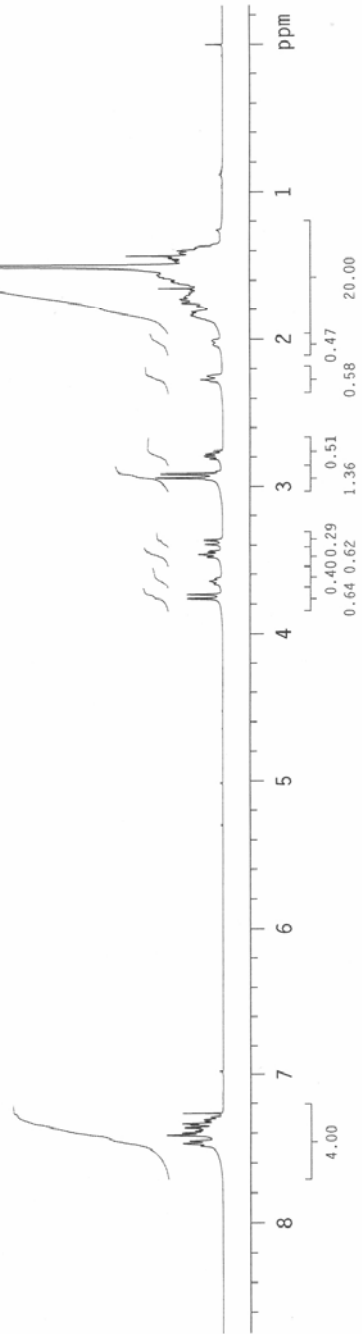

Std Carbon

File: mnt/1400/jdneukom/vmrsys/data/JDN-II-195-13CNMR.fid

Pulse Sequence: s2pul

Solvent: cdcl3

Ambient temperature

Operator: jdneukom

File: JDN-II-195-13CNMR

INOVA-400 "Dy.Chem.LSA,UMich.Edu"

Relax. delay 0.100 sec

Pulse 30.0 degrees

Acq. time 1.300 sec

Width 24140.0 Hz

512 repetitions

OBSERVE C13, 100.5712703 MHz

DECOUPLE H1, 399.9669644 MHz

Power 39 dB

continuously on

WALTZ-16 modulated

DATA PROCESSING

Line broadening 0.8 Hz

FT size 65536

Total time 12 min., 2 sec

Acquisition date: May 9 2008

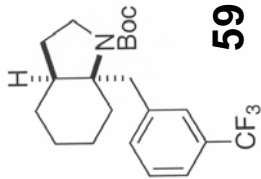

59

| INDEX | FREQUENCY PPM | HEIGHT |
|-------|---------------|--------|
| 1     | 15542.2       | 8.0    |
| 2     | 15487.7       | 13.5   |
| 3     | 14046.0       | 24.4   |
| 4     | 14009.9       | 11.5   |
| 5     | 13464.8       | 30.0   |
| 6     | 13422.0       | 16.0   |
| 7     | 13111.1       | 6.2    |
| 8     | 12923.3       | 22.9   |
| 9     | 12878.4       | 48.2   |
| 10    | 12773.7       | 18.5   |
| 11    | 12769.3       | 22.2   |
| 12    | 12373.7       | 10.7   |
| 13    | 12352.4       | 20.7   |
| 14    | 12348.7       | 18.1   |
| 15    | 8011.7        | 14.6   |
| 16    | 7912.3        | 30.8   |
| 17    | 7773.1        | 91.5   |
| 18    | 7741.4        | 94.6   |
| 19    | 7709.0        | 88.2   |
| 20    | 6433.7        | 34.9   |
| 21    | 4686.3        | 47.7   |
| 22    | 4675.3        | 21.7   |
| 23    | 4064.5        | 25.5   |
| 24    | 4007.1        | 21.1   |
| 25    | 3898.8        | 51.0   |
| 26    | 3822.2        | 39.3   |
| 27    | 3368.4        | 23.3   |
| 28    | 3302.1        | 43.9   |
| 29    | 2874.8        | 91.0   |
| 30    | 2868.9        | 162.0  |
| 31    | 2837.9        | 10.7   |
| 32    | 2808.8        | 49.2   |
| 33    | 2888.9        | 26.0   |
| 34    | 2874.9        | 28.1   |
| 35    | 2838.8        | 50.4   |
| 36    | 2868.5        | 100.2  |
| 37    | 2162.4        | 24.9   |
| 38    | 2130.0        | 47.7   |

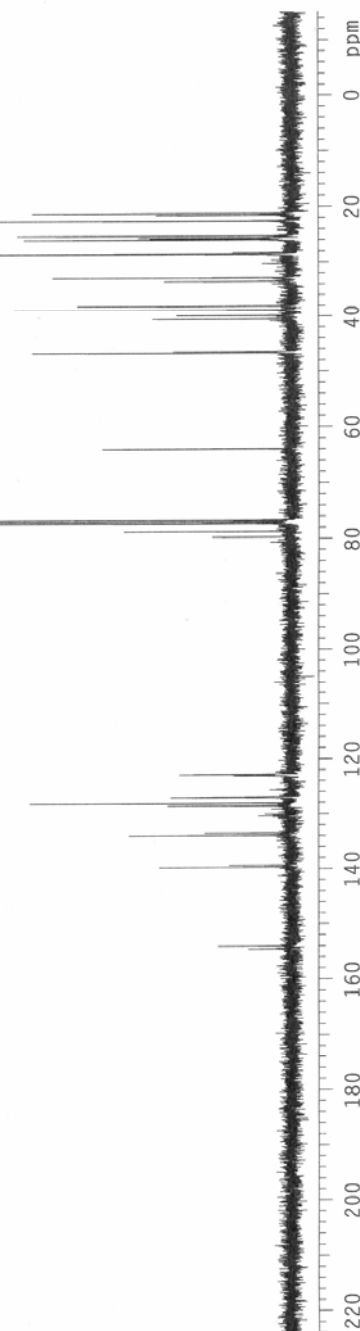

Standard Proton

File: JDN-II-194-1HNMR-2

Pulse Sequence: sZpu1

Solvent: cdcl3

Ambient temperature

Operator: Jdneukam

File: JDN-II-194-1HNMR-2

INOVA-500 "Md.Chem.LSA.UWich.Edu"

Relax. delay 0.100 sec

Pulse 45.0 degrees

Acq. time 3.000 sec

Width 8003.2 Hz

8 repetitions

OBSERVE H1, 499.9042658 MHz

DATA PROCESSING

Line broadening 0.2 Hz

FT size 65536

Total time 0 min, 31 sec

Acquisition date: Jun 11 2008

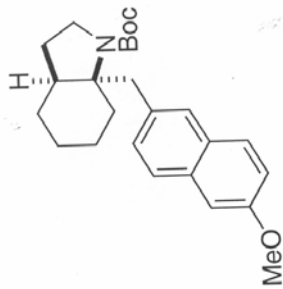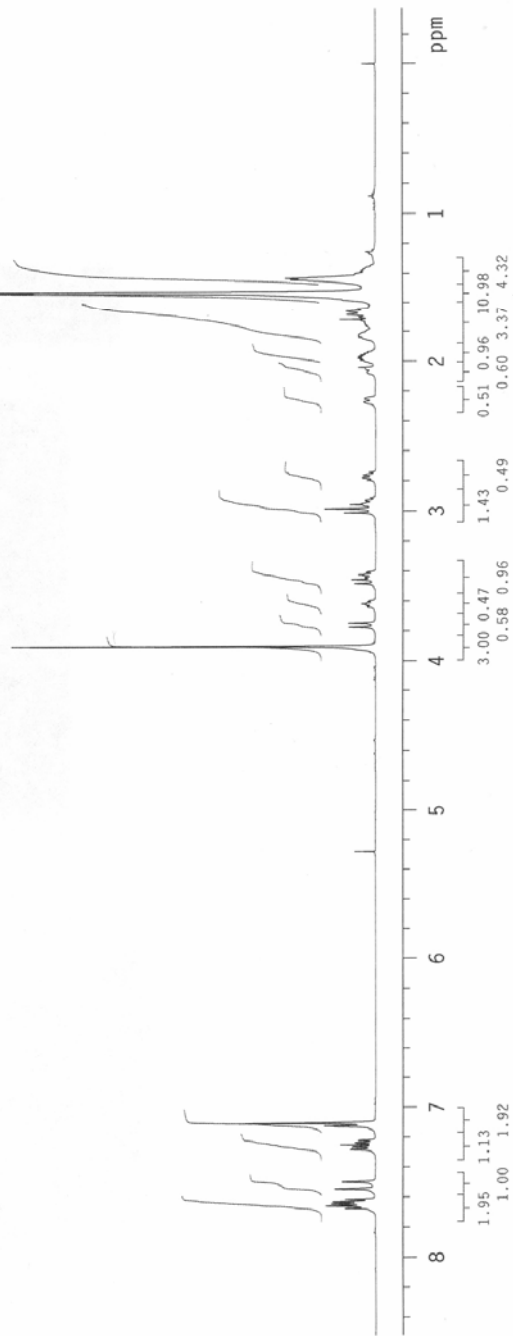

Std Carbon

File: mmt/1400/jdneukom/vmrsys/data/JDN-II-194-13CNMR.fid

Pulse Sequence: s2pul

Solvent: cdcl3

Ambient temperature

Operator: jdneukom

File: JDN-II-194-13CNMR

NOVA-400 "Dy.Chem.LSA.UHfch.Ecu"

Relax. delay 0.100 sec

Pulse 30.0 degrees

Acq. time 1.300 sec

Width 24140.0 Hz

512 repetitions

OBSERVE C13, 100.6712703 MHz

DECOUPLE H1, 599.9669644 MHz

Power 39 dB

continuously on

WALTZ-16 modulated

DATA PROCESSING

Line broadening 0.8 Hz

FT size 65536

Total time 12 min, 2 sec

Acquisition date: May 8 2008

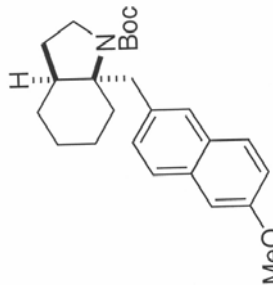

60

| INDEX | FREQUENCY PPM | HEIGHT  | INDEX | FREQUENCY PPM | HEIGHT |
|-------|---------------|---------|-------|---------------|--------|
| 1     | 15816.3       | 157.264 | 40    | 2605.1        | 25.903 |
| 2     | 15803.8       | 157.140 | 41    | 2594.1        | 25.794 |
| 3     | 15565.1       | 154.767 | 42    | 2569.8        | 25.552 |
| 4     | 15489.9       | 154.019 | 43    | 2281.0        | 22.680 |
| 5     | 13478.8       | 134.022 | 44    | 2276.6        | 22.636 |
| 6     | 13445.6       | 133.692 | 45    | 2179.3        | 21.670 |
| 7     | 13385.2       | 133.092 | 46    | 2161.7        | 21.494 |
| 8     | 13376.4       | 133.004 |       |               |        |
| 9     | 13050.7       | 129.766 |       |               |        |
| 10    | 12988.9       | 129.151 |       |               |        |
| 11    | 12977.1       | 129.034 |       |               |        |
| 12    | 12956.4       | 128.828 |       |               |        |
| 13    | 12952.8       | 128.792 |       |               |        |
| 14    | 12931.4       | 128.579 |       |               |        |
| 15    | 12715.5       | 126.433 |       |               |        |
| 16    | 12668.4       | 125.964 |       |               |        |
| 17    | 11929.5       | 118.617 |       |               |        |
| 18    | 11910.3       | 118.427 |       |               |        |
| 19    | 10602.7       | 105.425 |       |               |        |
| 20    | 7990.4        | 79.450  |       |               |        |
| 21    | 7881.4        | 78.366  |       |               |        |
| 22    | 7776.7        | 77.326  |       |               |        |
| 23    | 7745.1        | 77.011  |       |               |        |
| 24    | 7712.6        | 76.688  |       |               |        |
| 25    | 6475.0        | 64.382  |       |               |        |
| 26    | 6466.2        | 64.294  |       |               |        |
| 27    | 5556.3        | 55.248  |       |               |        |
| 28    | 4690.0        | 46.633  |       |               |        |
| 29    | 4681.1        | 46.546  |       |               |        |
| 30    | 4046.1        | 40.231  |       |               |        |
| 31    | 4012.2        | 39.694  |       |               |        |
| 32    | 3896.6        | 38.744  |       |               |        |
| 33    | 3854.6        | 38.327  |       |               |        |
| 34    | 3378.7        | 33.595  |       |               |        |
| 35    | 3301.2        | 32.884  |       |               |        |
| 36    | 2889.5        | 28.731  |       |               |        |
| 37    | 2887.3        | 28.709  |       |               |        |
| 38    | 2852.7        | 28.265  |       |               |        |
| 39    | 2828.7        | 28.138  |       |               |        |

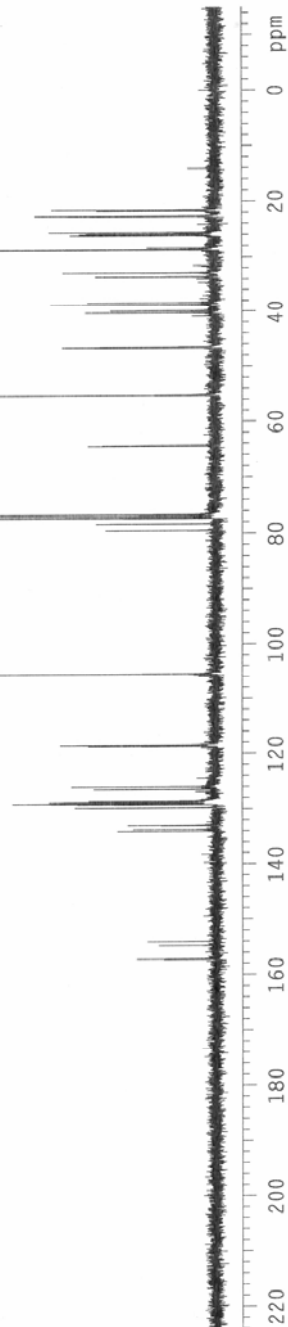

Standard Proton

File: JDN-III-5-1HNMR

Pulse Sequence: s2pul

Solvent: cdcl3

Ambient temperature

Operator: Jdneukom

File: JDN-III-5-1HNMR

INOVA-500 "Kr.chem.lsa.umich.edu"

Relax. delay 0.100 sec

Pulse 45.0 degrees

Acq. time 3.000 sec

Width 8003.2 Hz

8 repetitions

OBSERVE H1. 499.9042599 MHz

DATA PROCESSING

Line broadening 0.2 Hz

FT size 65536

Total time 0 min. 31 sec

Acquisition date: May 27 2008

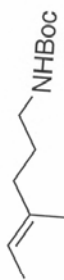

**61**

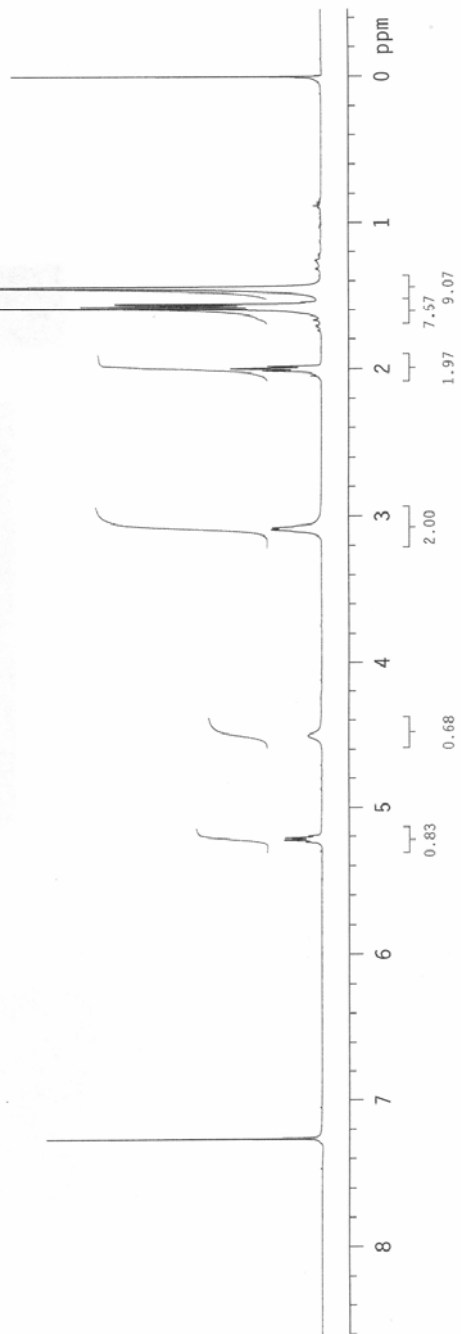



Std Carbon

File: JDM-III-5-13CNMR

Pulse Sequence: szpul

Solvent: cdc13

Ambient temperature

Operator: jdneukom

File: JDM-III-5-13CNMR

INOVA-400 "Zr-Chem.LSA.UMtch.Edu"

Relax. delay 0.100 sec

Pulse 30.0 degrees

Acq. time 1.300 sec

Width 24140.0 Hz

15264 repetitions

OBSERVE C13, 100.5712662 MHz

DECOUPLE H1, 399.9669644 MHz

Power 39 dB

continuously on

WALTZ-16 modulated

DATA PROCESSING

Line broadening 0.8 Hz

FT size 65536

Total time 5 hr, 58 min, 32 sec

Acquisition date: Jun 27 2008

| INDEX | FREQUENCY PPM | HEIGHT  |
|-------|---------------|---------|
| 1     | 15682.610     | 20.7    |
| 2     | 13567.559     | 155.935 |
| 3     | 11962.301     | 134.905 |
| 4     | 10564.055     | 118.944 |
| 5     | 7946.579      | 105.040 |
| 6     | 7775.665      | 79.014  |
| 7     | 7764.615      | 77.315  |
| 8     | 7743.988      | 77.205  |
| 9     | 7712.310      | 76.685  |
| 10    | 4056.094      | 40.331  |
| 11    | 3703.217      | 36.822  |
| 12    | 2858.228      | 28.420  |
| 13    | 2828.024      | 28.120  |
| 14    | 1556.489      | 15.476  |
| 15    | 1339.900      | 13.323  |

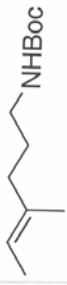

61

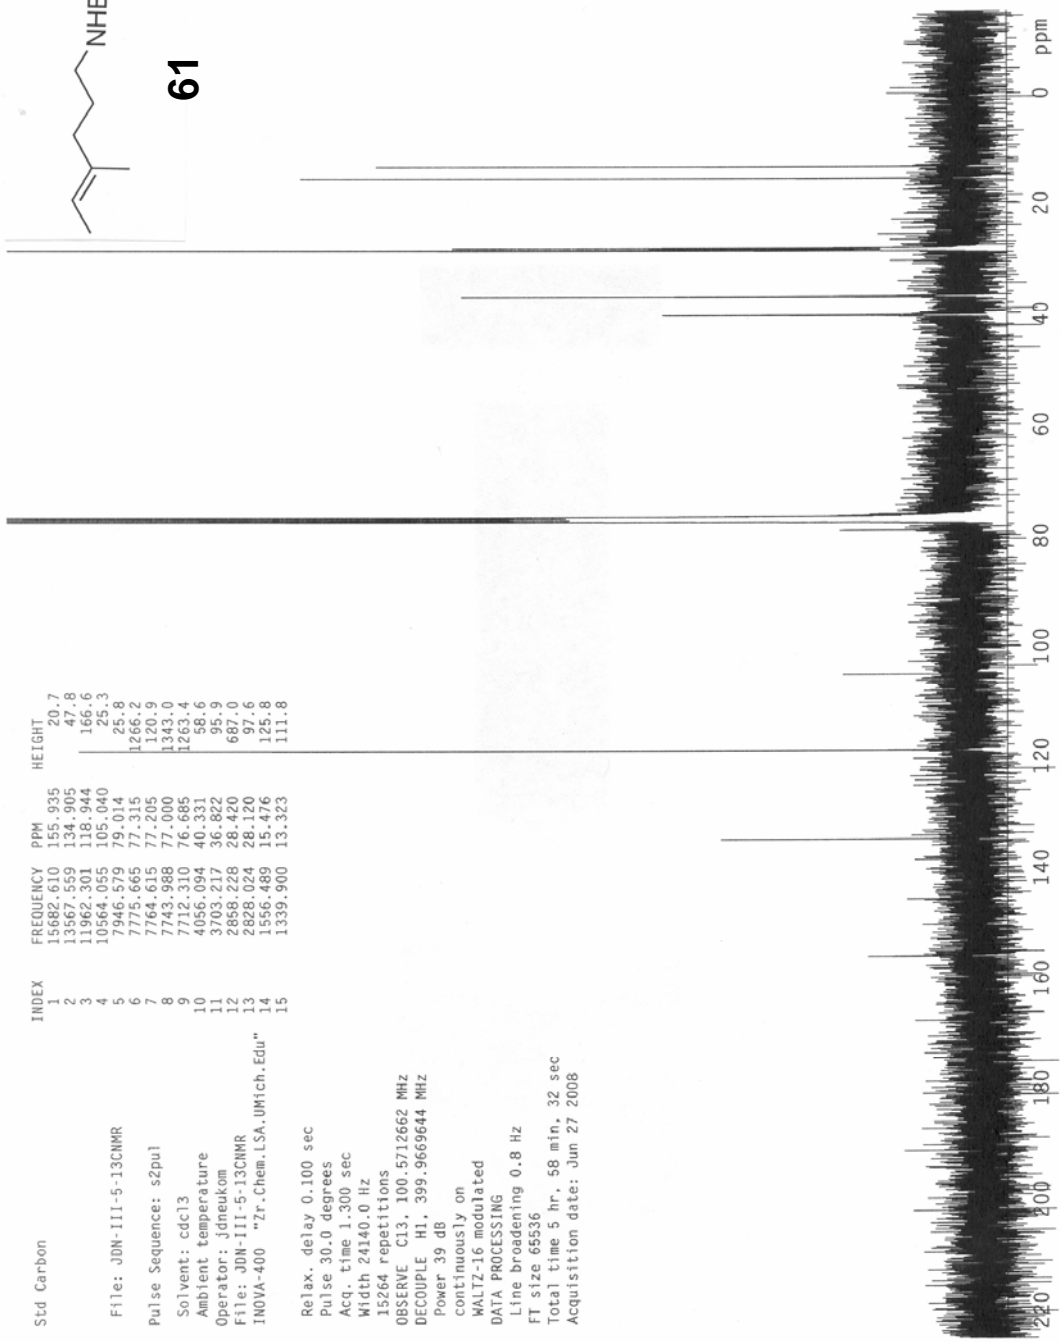

Std proton

File: JDN-III-29-1HMR-pub

Pulse Sequence: s2pul

Solvent: cdcl3

Ambient temperature

Operator: jdneukom

File: JDN-III-29-1HMR-pub

INOVA-400 "Md.Chem.LSA.UMich.Edu"

Relax. delay 0.500 sec

Pulse 45.0 degrees

Acq. time 3.000 sec

Width 6399.5 Hz

8 repetitions

OBSERVE H1, 399.9649495 MHz

DATA PROCESSING

Line broadening 0.2 Hz

FT size 65536

Total time 0 min, 35 sec

Acquisition date: Jun 27 2008

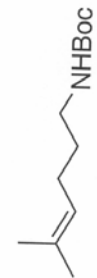

62

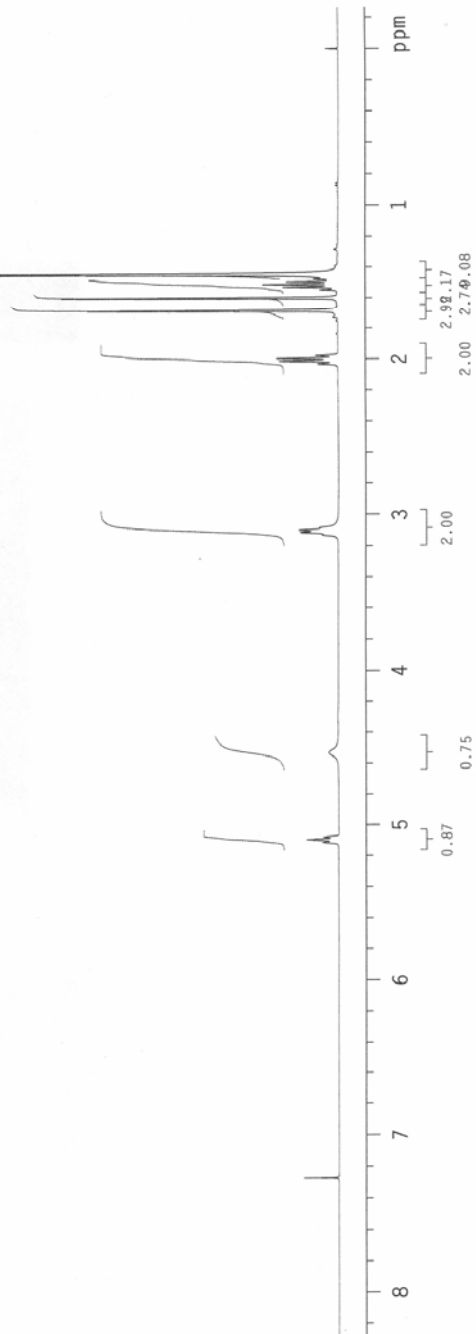

| INDEX | FREQUENCY PPM | HEIGHT  |
|-------|---------------|---------|
| 1     | 15681.873     | 155.928 |
| 2     | 13292.772     | 132.173 |
| 3     | 12425.683     | 123.551 |
| 4     | 7939.948      | 78.948  |
| 5     | 7776.402      | 77.322  |
| 6     | 7743.988      | 77.000  |
| 7     | 7712.310      | 76.685  |
| 8     | 4050.937      | 40.279  |
| 9     | 3022.511      | 30.053  |
| 10    | 2856.018      | 28.398  |
| 11    | 2581.968      | 25.673  |
| 12    | 2542.923      | 25.285  |
| 13    | 1773.077      | 17.630  |

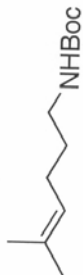

62

Std Carbon  
 File: JDN-III-29-13CNMR  
 Pulse Sequence: s2pul  
 Solvent: cdcl3  
 Ambient temperature  
 Operator: jdnukom  
 File: JDN-III-29-13CNMR  
 INOVA-400 "Md.Chem.LSA.UMich.Edu"  
 Relax. delay 0.100 sec  
 Pulse 30.0 degrees  
 Acq. time 1.300 sec  
 Width 24140.0 Hz  
 256 repetitions  
 OBSERVE C13, 100.5712685 MHz  
 DECOUPLE H1, 399.9669644 MHz  
 Power 39 dB  
 continuously on  
 WALTZ-16 modulated  
 DATA PROCESSING  
 Line broadening 0.8 Hz  
 FT size 65536  
 Total time 6 min, 0 sec  
 Acquisition date: Jun 27 2008

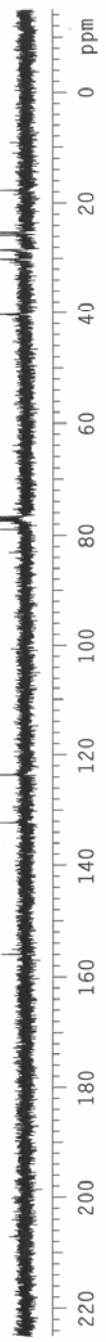

Standard Proton

File: mbb-9-192-HNMR-500

Pulse Sequence: s2pul

Solvent: cdcl3

Ambient temperature

Operator: myrabert

File: mbb-9-192-HNMR-500

INOVA-500 "Kr.chem.lsa.umich.edu"

Relax. delay 0.100 sec

Pulse 45.0 degrees

Acq. time 3.000 sec

Width 8003.2 Hz

8 repetitions

OBSERVE H1, 499.9042554 MHz

DATA PROCESSING

Line broadening 0.2 Hz

FT size 65536

Total time 0 min, 31 sec

Acquisition date: Sep 3 2007

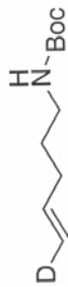

63

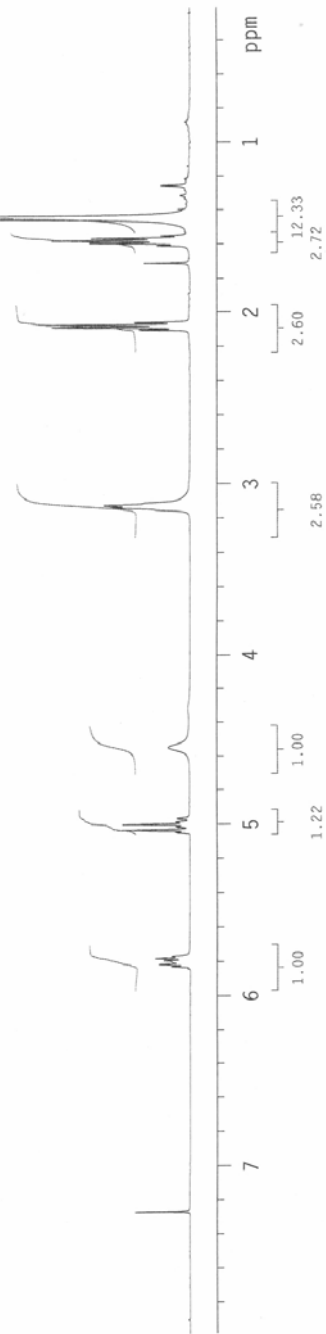



STANDARD PROTON PARAMETERS

File: mbb-10-130-HNMR-400

Pulse Sequence: s2pul

Solvent: CDCl3

Ambient temperature

Operator: myrabort

File: mbb-10-130-HNMR-400

VNMR-400 "Md.Chem.LSA,UMich.Edu"

Relax. delay 1.000 sec

Pulse 45.0 degrees

Acq. time 2.556 sec

Width 6410.3 Hz

8 repetitions

OBSERVE H1, 399.5389165 MHz

DATA PROCESSING

FT size 32768

Total time 0 min, 35 sec

Acquisition date: Apr 24 2008

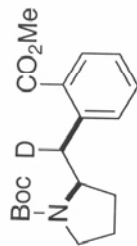

64

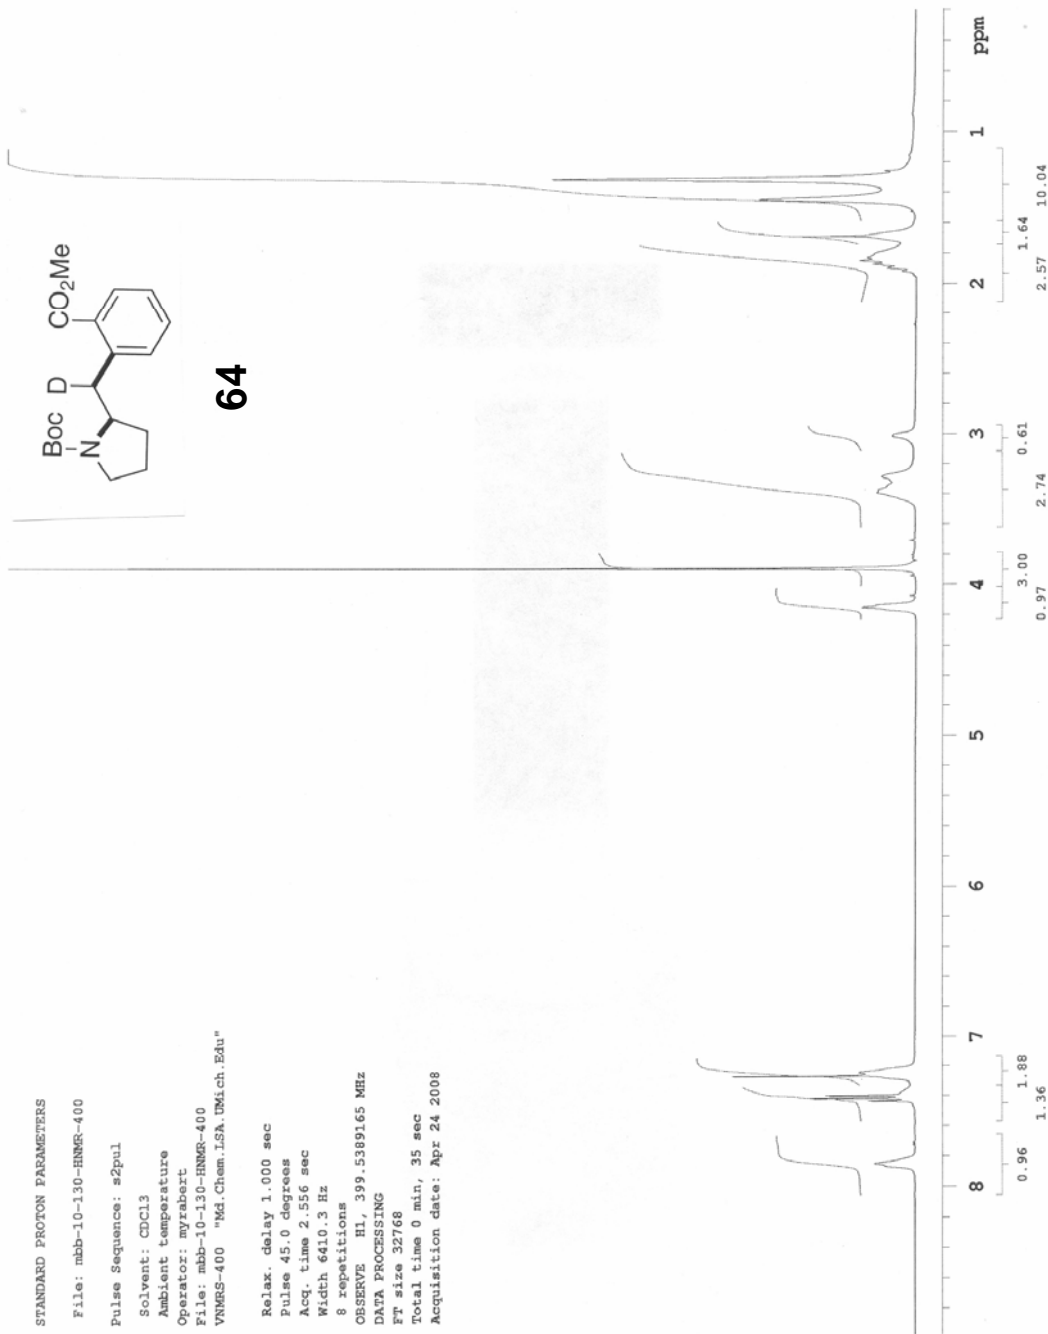

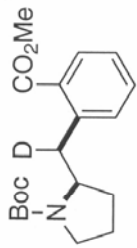

64

| INDEX | FREQUENCY PPM | HEIGHT  |
|-------|---------------|---------|
| 1     | 16928.126     | 168.082 |
| 2     | 15668.848     | 154.586 |
| 3     | 14200.228     | 140.997 |
| 4     | 13280.808     | 131.867 |
| 5     | 13268.352     | 131.744 |
| 6     | 13128.999     | 130.360 |
| 7     | 12692.255     | 126.024 |
| 8     | 7946.460      | 78.902  |
| 9     | 7787.644      | 77.325  |
| 10    | 7775.967      | 77.209  |
| 11    | 7755.725      | 77.008  |
| 12    | 7723.806      | 76.691  |
| 13    | 5905.986      | 58.642  |
| 14    | 5232.576      | 51.955  |
| 15    | 4689.176      | 46.560  |
| 16    | 4621.446      | 45.887  |
| 17    | 3751.072      | 37.245  |
| 18    | 3050.413      | 30.288  |
| 19    | 2907.167      | 28.866  |
| 20    | 2872.134      | 28.518  |
| 21    | 2850.336      | 28.301  |
| 22    | 2367.660      | 23.509  |
| 23    | 2284.360      | 22.682  |

STANDARD CARBON PARAMETERS

File: mbb-10-130-C13-400  
 Pulse Sequence: s2pul  
 Solvent: cdcl3  
 Temp: 20.0 C / 293.1 K  
 Operator: myrabert  
 File: mbb-10-130-C13-400  
 VNMR5-401 "Kr.chem.lsa.umich.edu"  
 Relax. delay 1.000 sec  
 Pulse 45.0 degrees  
 Acq. time 1.286 sec  
 Width 25510.2 Hz  
 3040 repetitions  
 OBSERVE C13, 100.7132880 MHz  
 DECOUPLE H1, 400.5317616 MHz  
 Power 39 dB  
 continuously on  
 WALTZ-16 modulated  
 DATA PROCESSING  
 Line broadening 0.5 Hz  
 FT size 65536  
 Total time 1 hr, 56 min, 12 sec  
 Acquisition date: Apr 25 2008

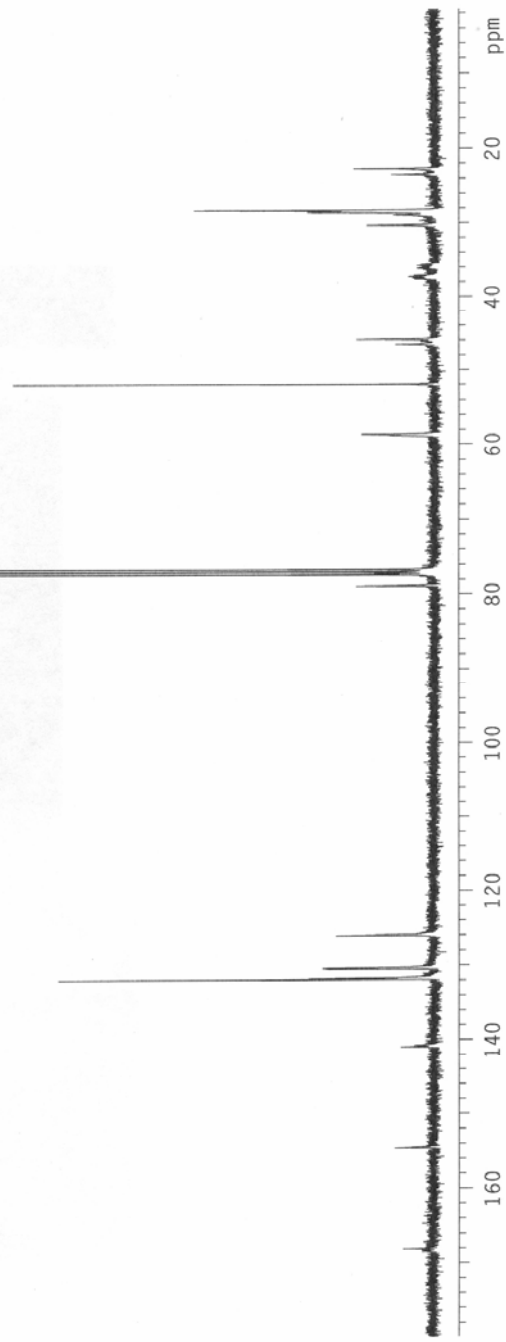

Standard Proton

File: mbb-10-133-1HMR-benzene

Pulse Sequence: sZpul

Solvent: c6d6

Ambient temperature

Operator: jdneukom

File: mbb-10-133-1HMR-benzene

INOVA-500 "Kr.chem.lsa.umich.edu"

Relax. delay 0.100 sec

Pulse 45.0 degrees

Acq. time 3.000 sec

Width 8003.2 Hz

8 repetitions

OBSERVE H1 499.9042899 MHz

DATA PROCESSING

Line broadening 0.2 Hz

FT size 65536

Total time 0 min, 31 sec

Acquisition date: Jul 18 2008

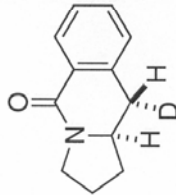

**64a**

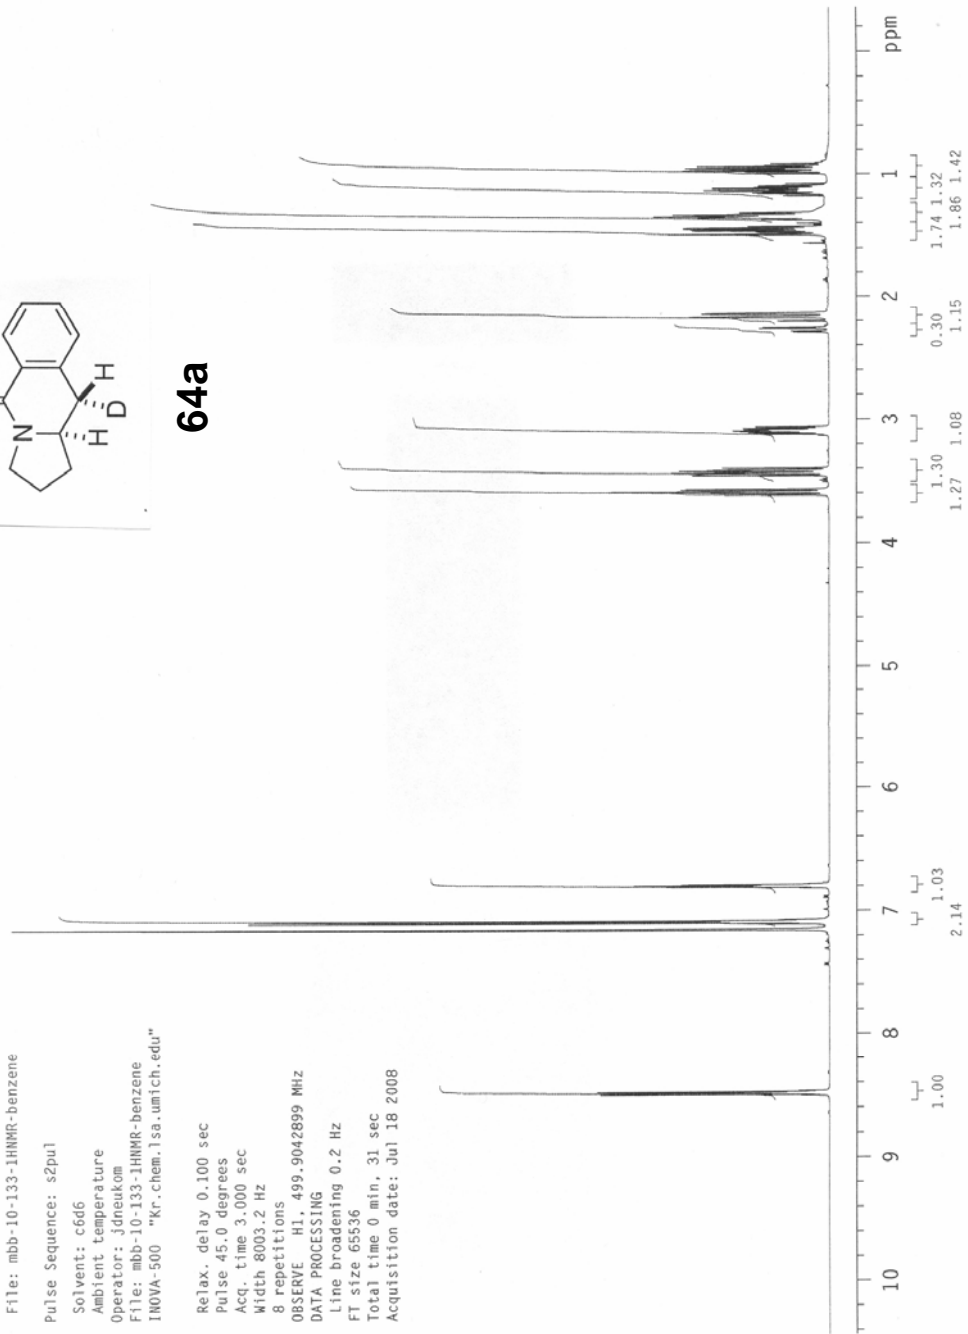



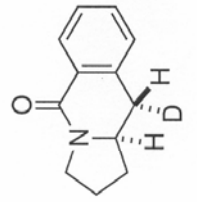

**64a**

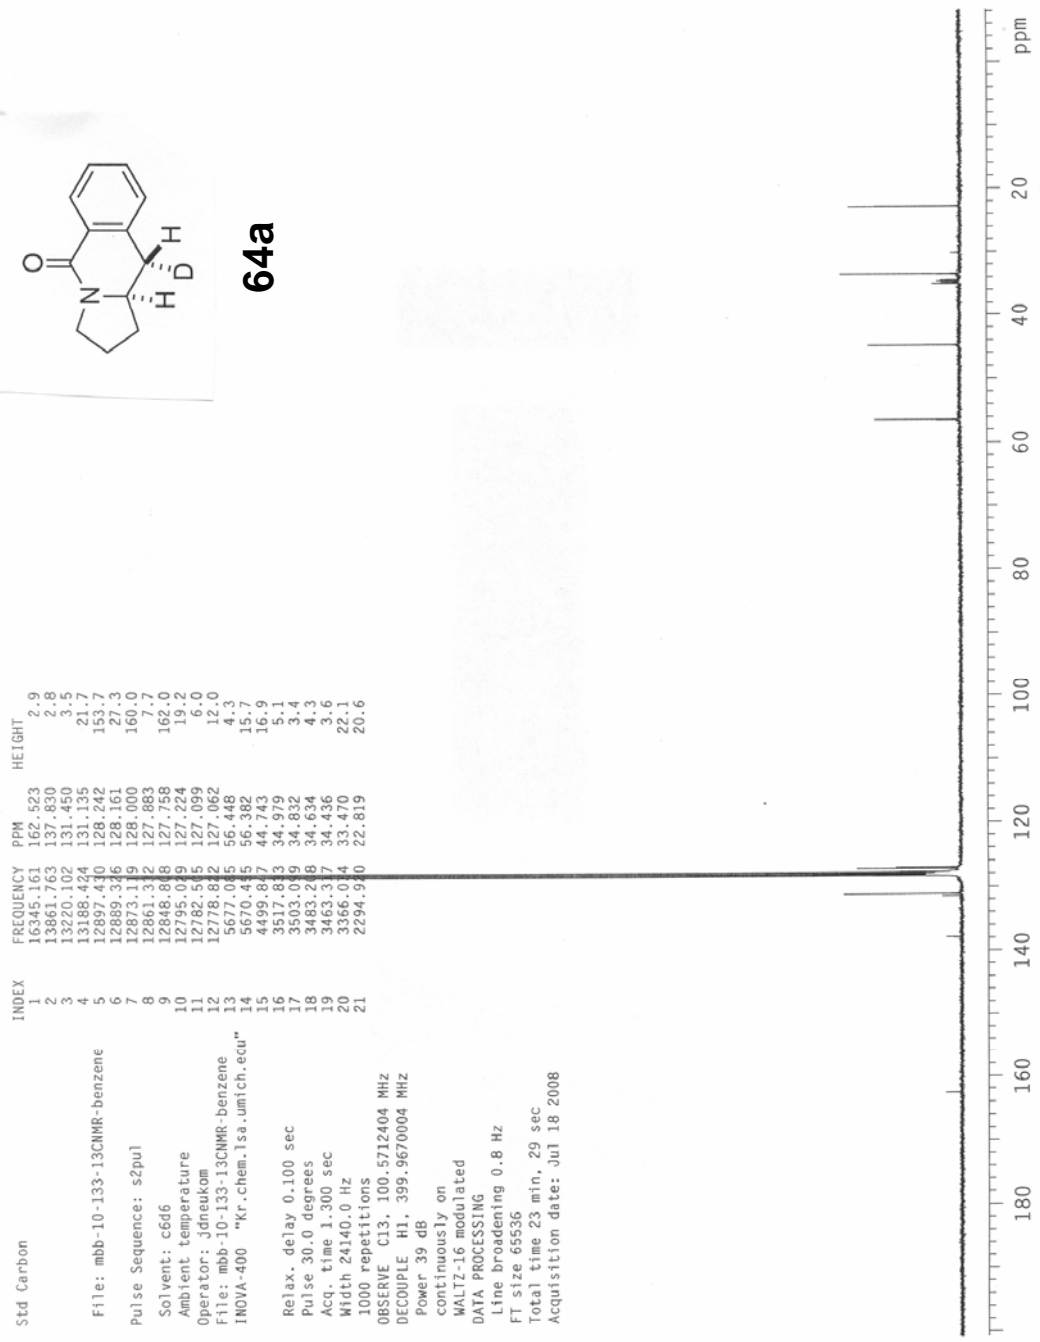

Std Carbon

File: mbb-10-133-13CNMR-benzene

Pulse Sequence: s2pul

Solvent: c6d6

Ambient temperature

Operator: jdneukom

File: mbb-10-133-13CNMR-benzene

INOVA-400 "Kr.chem.1sa.umich.edu"

Relax. delay 0.100 sec

Pulse 30.0 degrees

Acq. time 1.300 sec

Width 24140.0 Hz

1000 repetitions

OBSERVE C13, 100.5712404 MHz

DECOUPLE H1, 399.9670004 MHz

Power 39 dB

continuously on

MALTZ-16 modulated

DATA PROCESSING

Line broadening 0.8 Hz

FT size 65536

Total time 23 min, 29 sec

Acquisition date: Jul 18 2008

Standard Proton

File: mbb-10-131-co-f32-HNMR-1-500

Pulse Sequence: s2pul

Solvent: cdcl3

Ambient temperature

Operator: myrabort

File: mbb-10-131-co-f32-HNMR-1-500

INOVA-500 "kr.chem.lsa.umich.edu"

Relax. delay 0.100 sec

Pulse 45.0 degrees

Acq. time 3.000 sec

Width 8003.2 Hz

8 repetitions

OBSERVE H1. 499.9042599 MHz

DATA PROCESSING

Line broadening 0.2 Hz

FT size 65536

Total time 0 min, 31 sec

Acquisition date: May 13 2008

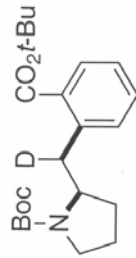

**65a**

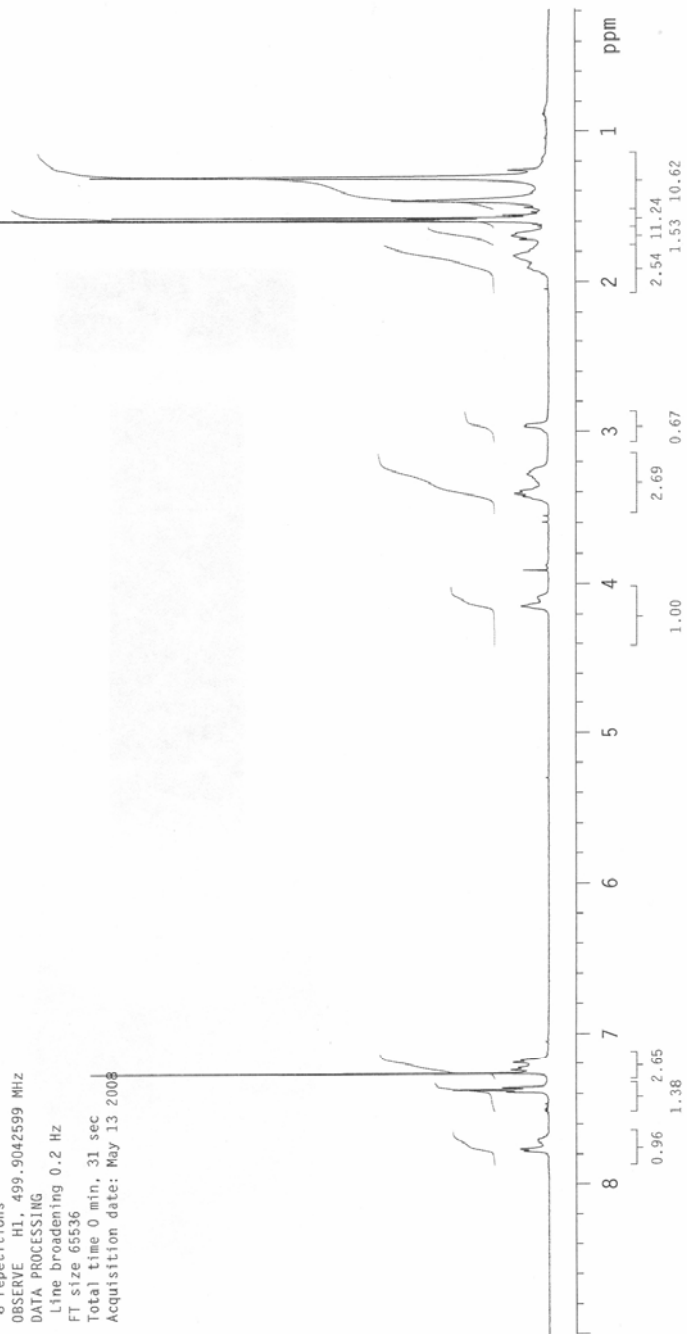

Standard Proton

File: mbb-10-131-co-f72

Pulse Sequence: s2pul

Solvent: cdcl3

Temp. 25.5 C / 298.6 K

Operator: myrabort

File: mbb-10-131-co-f72

INOVA-500 "Kr.chem.lsa.umich.edu"

Relax. delay 0.100 sec

Pulse 45.0 degrees

Acq. time 3.000 sec

Width 8003.2 Hz

16 repetitions

OBSERVE H1, 499.9042608 MHz

DATA PROCESSING

Line broadening 0.2 Hz

FT size 65536

Total time 0 min, 55 sec

Acquisition date: May 10 2008

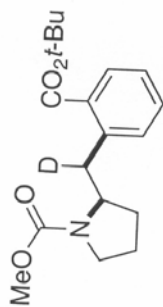

**65b**

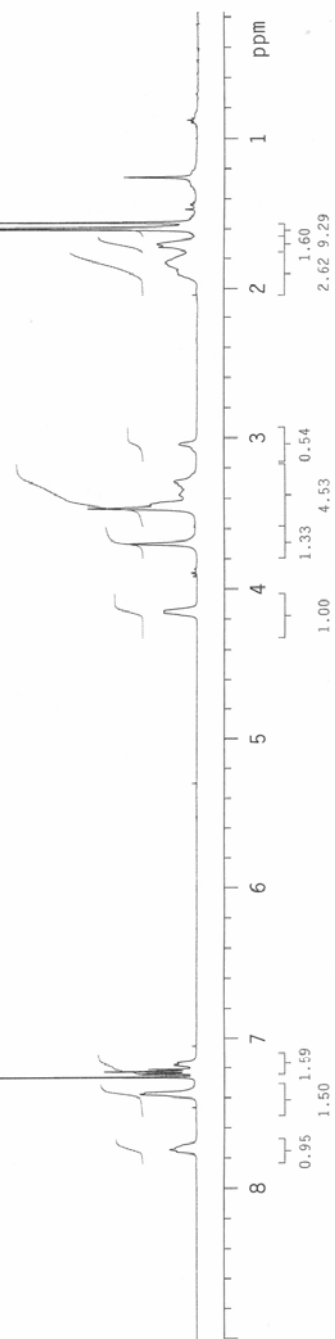

Standard Proton

File: mbb-10-131-co-f2-48

Pulse Sequence: s2pul

Solvent: cdcl3

Temp: 25.5 C / 298.6 K

Operator: myrabort

File: mbb-10-131-co-f2-48

INOVA-500 "Kr.chem.1sa.umich.edu"

Relax. delay 0.100 sec

Pulse 45.0 degrees

Acq. time 3.000 sec

Width 8003.2 Hz

16 repetitions

OBSERVE H1, 499.9042610 MHz

DATA PROCESSING

Line broadening 0.2 Hz

FT size 65536

Total time 0 min, 55 sec

Acquisition date: May 10 2008

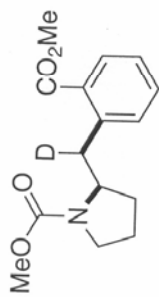

**65c**

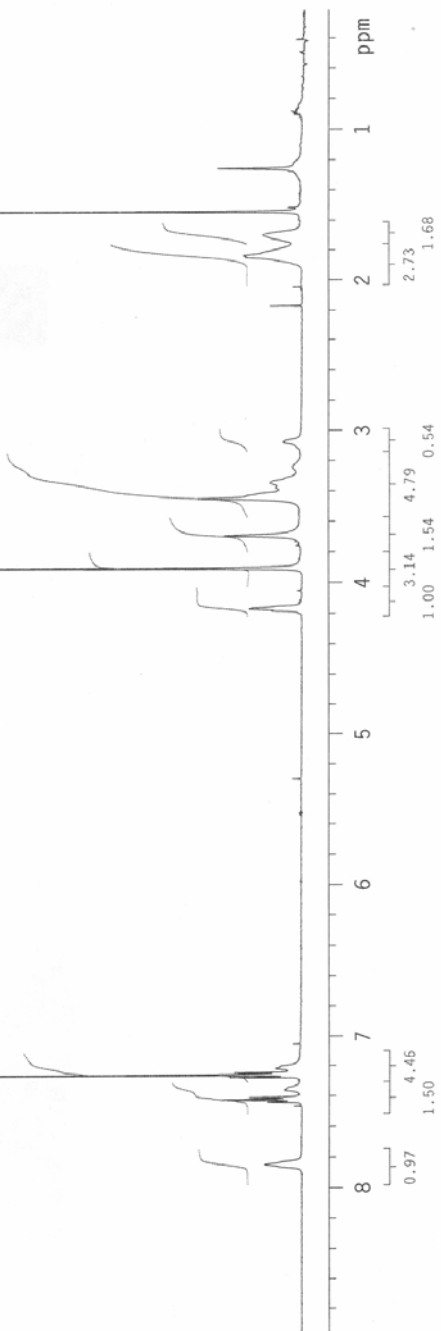

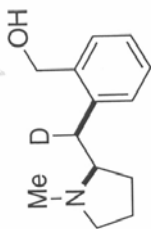

66

STANDARD PROTON PARAMETERS

File: mbb-10-146-HNMR-400  
 Pulse Sequence: s2pul  
 Solvent: cdcl3  
 Temp. 20.0 C / 293.1 K  
 Operator: myrabort  
 File: mbb-10-146-HNMR-400  
 VNMR-401 "Kr.chem.lsa.umich.edu"  
 Relax. delay 1.000 sec  
 Pulse 45.0 degrees  
 Acq. time 2.556 sec  
 Width 6410.3 Hz  
 8 repetitions  
 OBSERVE H1. 400.5297561 MHZ  
 DATA PROCESSING  
 FT size 32768  
 Total time 0 min, 35 sec  
 Acquisition date: May 15 2008

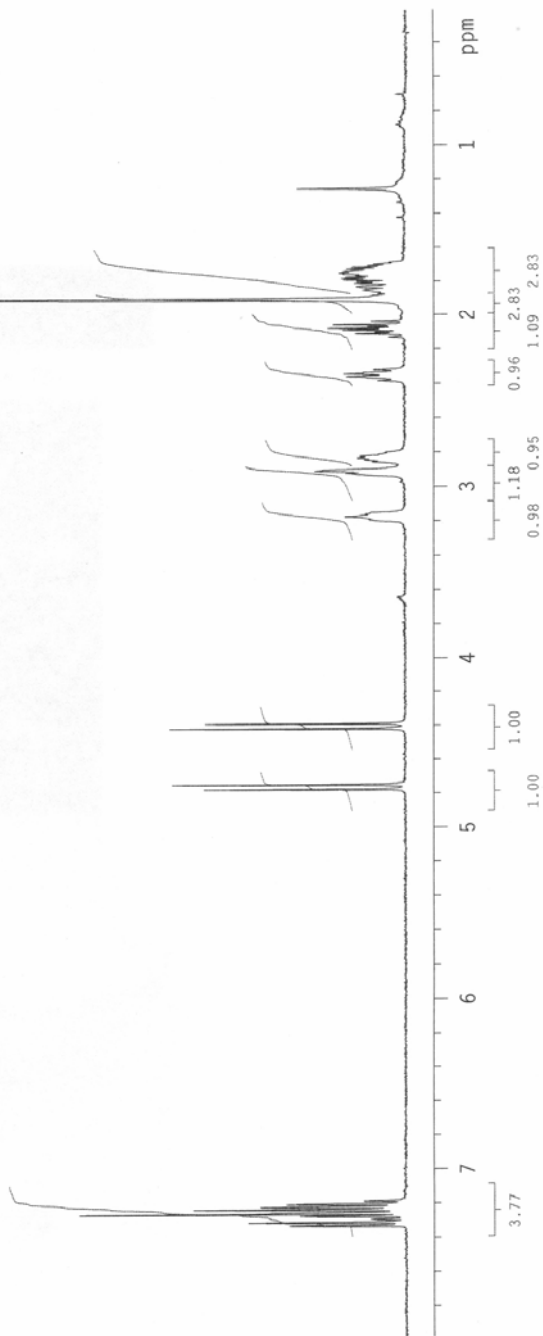

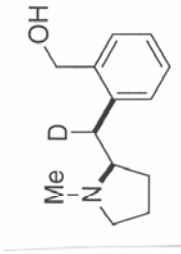

66

| INDEX | FREQUENCY PPM | HEIGHT |
|-------|---------------|--------|
| 1     | 14149.715     | 7.5    |
| 2     | 13909.934     | 3.7    |
| 3     | 13143.880     | 47.8   |
| 4     | 13125.974     | 13.3   |
| 5     | 13122.860     | 26.2   |
| 6     | 12907.213     | 44.6   |
| 7     | 12760.853     | 35.0   |
| 8     | 7787.734      | 105.0  |
| 9     | 7776.835      | 5.5    |
| 10    | 7755.815      | 110.7  |
| 11    | 7723.896      | 109.2  |
| 12    | 6776.450      | 10.3   |
| 13    | 6366.954      | 47.7   |
| 14    | 5781.514      | 33.7   |
| 15    | 4311.688      | 14.2   |
| 16    | 3895.964      | 3.1    |
| 17    | 3878.837      | 2.7    |
| 18    | 3182.849      | 18.6   |
| 19    | 2991.336      | 4.9    |
| 20    | 2411.346      | 29.1   |

STANDARD CARBON PARAMETERS  
 File: mbb-10-146-C13-400  
 Pulse Sequence: s2pul  
 Solvent: cdcl3  
 Temp: 20.0 C / 293.1 K  
 Operator: myrabert  
 File: mbb-10-146-C13-400  
 VNMR5-401 "Kr.chem.lsa.umich.edu"

Relax. delay 1.000 sec  
 Pulse 45.0 degrees  
 Acq. time 1.285 sec  
 Width 25510.2 Hz  
 3984 repetitions  
 OBSERVE C13, 100.7132863 MHZ  
 DECOUPLE H1, 400.5317616 MHZ  
 Power 45 dB  
 continuously on  
 WALTZ-16 modulated  
 DATA PROCESSING  
 Line broadening 0.5 Hz  
 FT size 65536  
 Total time 2 hr, 32 min, 17 sec  
 Acquisition date: May 15 2008

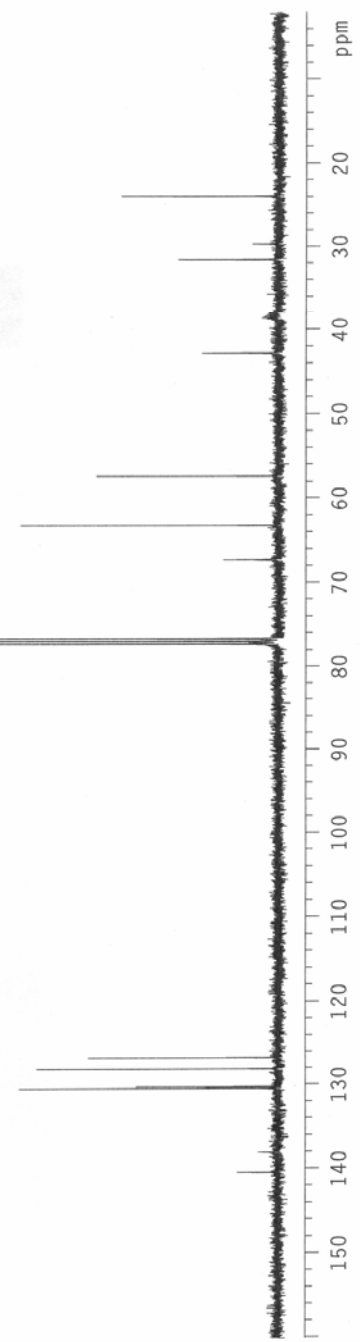

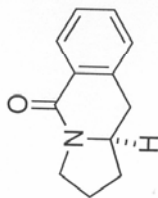

**67**

Standard Proton

File: mbb-9-168-benzene  
 Pulse Sequence: s2pul  
 Solvent: c6d6  
 Ambient temperature  
 Operator: myrabert  
 File: mbb-9-168-benzene  
 INOVA-500 "Kr.chem.lsa.umich.edu"  
 Relax. delay 0.100 sec  
 Pulse 45.0 degrees  
 Acq. time 3.000 sec  
 Width 8003.2 Hz  
 8 repetitions  
 OBSERVE H1, 499.9042891 MHz  
 DATA PROCESSING  
 Line broadening 0.2 Hz  
 FT size 65536  
 Total time 0 min, 31 sec  
 Acquisition date: Aug 18 2007

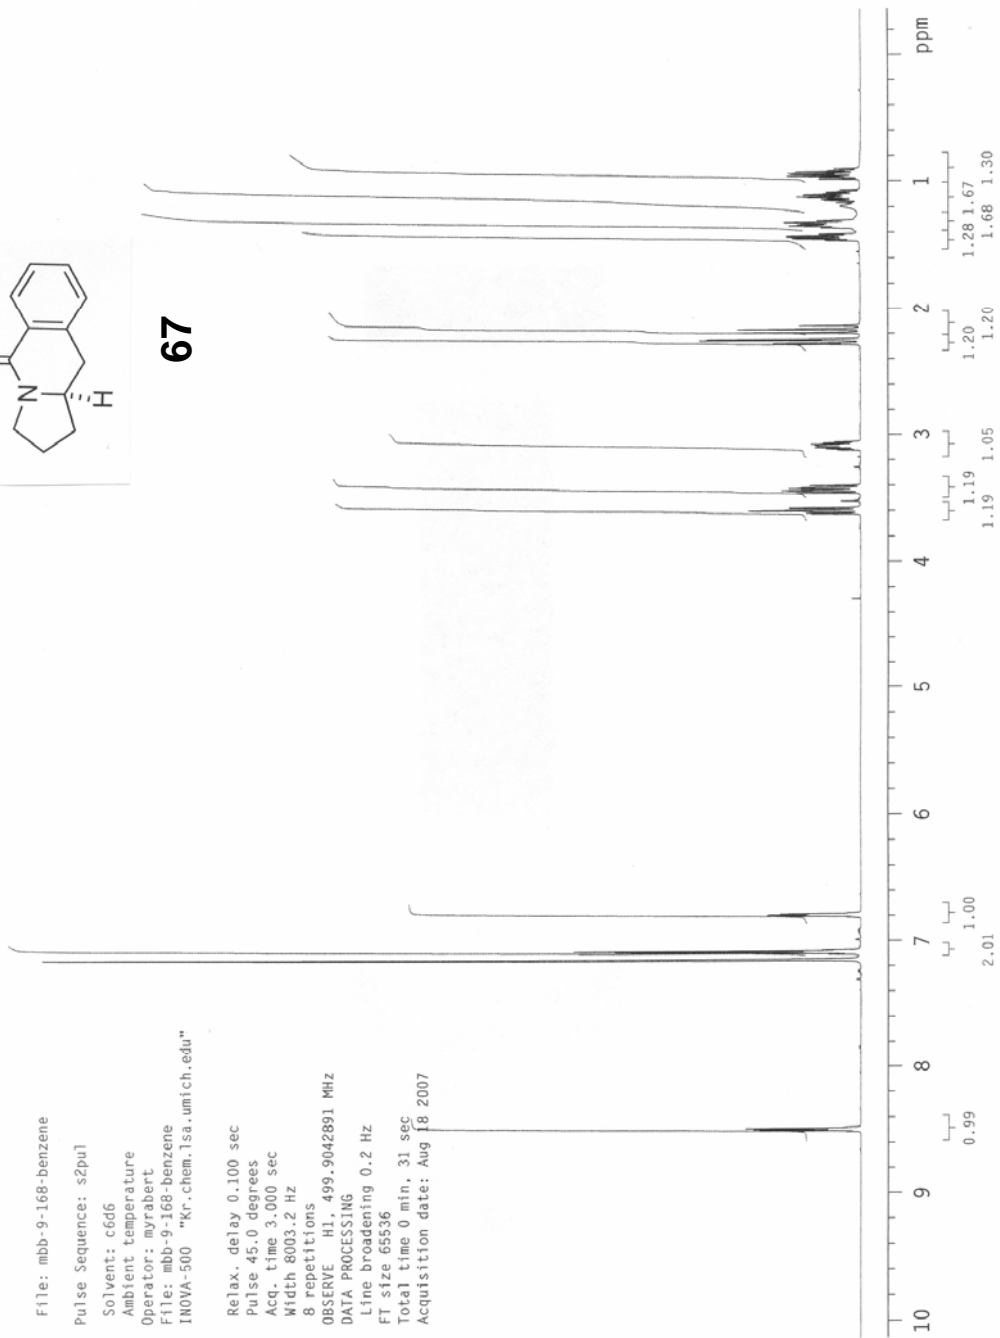

Standard Carbon

File: mbb-9-168-benzene-C13-500

Pulse Sequence: s2pul

Solvent: c6d6

Ambient temperature

Operator: myrabort

File: mbb-9-168-benzene-C13-500

INOVA-500 "Kr.chem.lsa.umich.edu"

Relax. delay 0.100 sec

Pulse 45.0 degrees

Acq. time 1.300 sec

Width 30165.9 Hz

1216 repetitions

OBSERVE C13, 125.7010359 MHz

DECUPLE H1, 499.9067982 MHz

Power 31 dB

continuously on

WALTZ-16 modulated

DATA PROCESSING

Line broadening 1.0 Hz

FT size 131072

Total time 28 min, 36 sec

Acquisition date: Aug 18 2007

| INDEX | FREQUENCY PPM | HEIGHT  |
|-------|---------------|---------|
| 1     | 20391.184     | 162.220 |
| 2     | 17290.634     | 137.554 |
| 3     | 16480.975     | 131.112 |
| 4     | 16444.612     | 130.823 |
| 5     | 16086.502     | 127.974 |
| 6     | 16073.614     | 127.872 |
| 7     | 16049.218     | 127.678 |
| 8     | 16025.283     | 127.487 |
| 9     | 15953.937     | 126.920 |
| 10    | 15935.985     | 126.777 |
| 11    | 7054.588      | 56.122  |
| 12    | 5585.785      | 44.437  |
| 13    | 4354.956      | 34.645  |
| 14    | 4166.235      | 33.144  |
| 15    | 2826.315      | 22.484  |
| 16    | 2402.843      | 19.116  |
| 17    | 2400.542      | 19.097  |

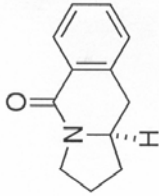

67

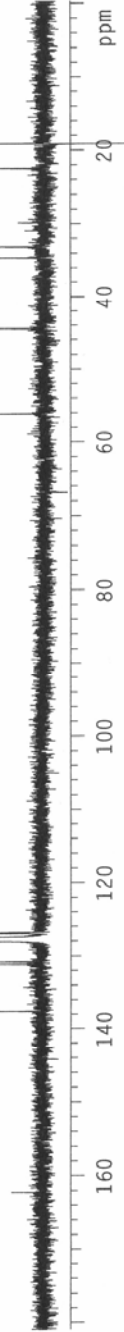





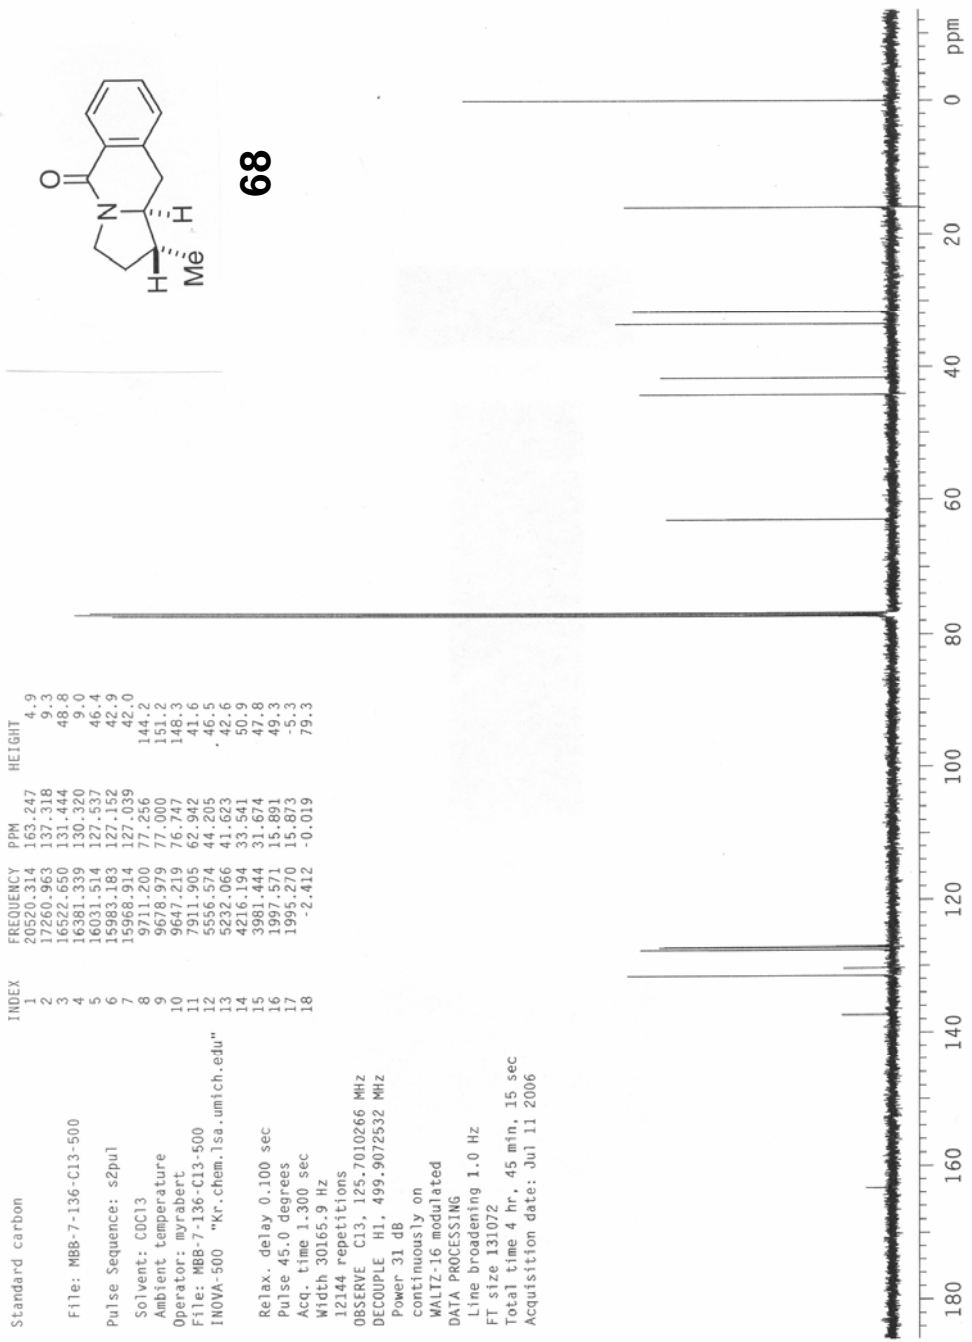

STANDARD PROTON PARAMETERS

File: mbb-10-124-HNMR-400  
Pulse Sequence: s2pul  
Solvent: cdcl3  
Temp: 10.0 C / 283.1 K  
Operator: myrabort  
File: mbb-10-124-HNMR-400  
VMRS-401 "Kr-chem.lsa.umich.edu"

Relax. delay 1.000 sec  
Pulse 45.0 degrees  
Acq. time 2.556 sec  
Width 6410.3 Hz  
8 repetitions  
OBSERVE H1, 400.5297559 MHz  
DATA PROCESSING  
FT size 32768  
Total time 0 min, 35 sec  
Acquisition date: Apr 18 2008

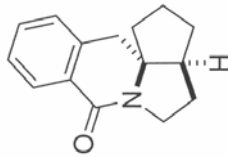

69

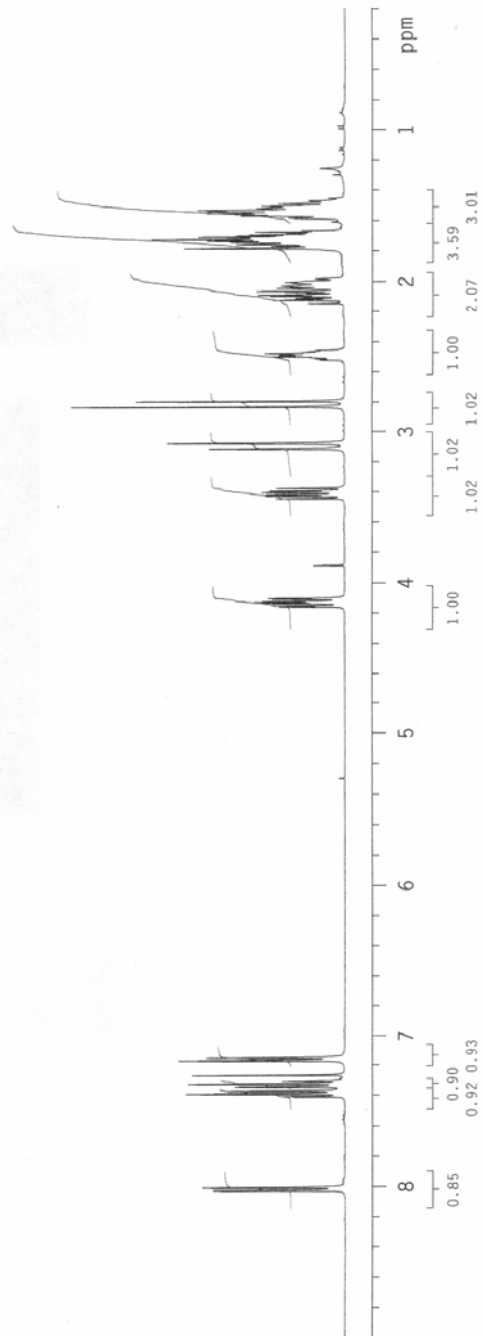

STANDARD CARBON PARAMETERS

File: mbb-10-124-C13-400  
 Pulse Sequence: s2pul  
 Solvent: cdcl3  
 Temp. 10.0 C / 283.1 K  
 Operator: myrabort  
 File: mbb-10-124-C13-400  
 VMWRS-401 "Kr.chem.lsa.umich.edu"

Relax. delay 1.000 sec  
 Pulse 45.0 degrees  
 Acq. time 1.285 sec  
 Width 25510.2 Hz  
 112 repetitions

OBSERVE C13, 100.7132888 MHz  
 DECOUPLE H1, 400.5317616 MHz  
 Power 39 dB  
 continuously on  
 WALTZ-16 modulated  
 DATA PROCESSING  
 Line broadening 0.5 Hz  
 FT size 65536  
 Total time 4 min, 16 sec  
 Acquisition date: Apr 18 2008

| INDEX | FREQUENCY | PPM     | HEIGHT |
|-------|-----------|---------|--------|
| 1     | 16332.498 | 162.168 | 9.2    |
| 2     | 13821.804 | 137.239 | 12.8   |
| 3     | 13230.137 | 131.364 | 31.9   |
| 4     | 13068.985 | 129.764 | 12.5   |
| 5     | 12872.801 | 127.816 | 37.2   |
| 6     | 12850.224 | 127.592 | 34.7   |
| 7     | 12790.279 | 126.997 | 33.2   |
| 8     | 7787.576  | 77.324  | 139.0  |
| 9     | 7755.657  | 77.007  | 143.0  |
| 10    | 7723.738  | 76.690  | 140.2  |
| 11    | 7261.303  | 72.099  | 21.2   |
| 12    | 5027.759  | 49.922  | 32.5   |
| 13    | 4447.769  | 44.163  | 27.8   |
| 14    | 4014.139  | 39.857  | 33.6   |
| 15    | 3826.519  | 37.994  | 38.6   |
| 16    | 3280.783  | 32.575  | 30.6   |
| 17    | 3065.915  | 30.442  | 32.0   |
| 18    | 2562.219  | 25.441  | 37.0   |

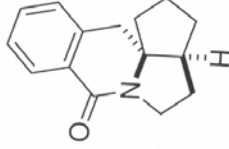

69

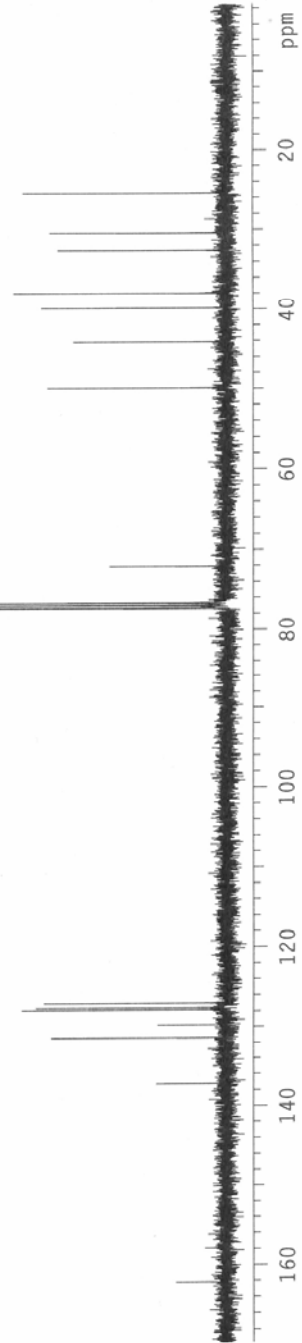

Supplement: NIHMS87958-supplement-Supporting_Inf.pdf [file NIHMS87958-supplement-Supporting_Inf.pdf]
